# Supplementary material
Source: publisher figshare collection journal article supplement (https://acs.figshare.com/ndownloader/files/4171873)
Supplement: Supplementary file 1 [file 4171873]

data_complex-2
 
_audit_creation_method            SHELXL-97
_chemical_name_systematic
;
 ?
;
_chemical_name_common             complex-2
_chemical_melting_point           ?
_chemical_formula_moiety          'C84 H136 Ba2 I2 K2 N4 O8'
_chemical_formula_sum
 'C84 H136 Ba2 I2 K2 N4 O8'
_chemical_formula_weight          1936.63
 
loop_
 _atom_type_symbol
 _atom_type_description
 _atom_type_scat_dispersion_real
 _atom_type_scat_dispersion_imag
 _atom_type_scat_source
 'Ba'  'Ba'  -0.3244   2.2819
 'International Tables Vol C Tables 4.2.6.8 and 6.1.1.4'
 'I'  'I'  -0.4742   1.8119
 'International Tables Vol C Tables 4.2.6.8 and 6.1.1.4'
 'K'  'K'   0.2009   0.2494
 'International Tables Vol C Tables 4.2.6.8 and 6.1.1.4'
 'O'  'O'   0.0106   0.0060
 'International Tables Vol C Tables 4.2.6.8 and 6.1.1.4'
 'N'  'N'   0.0061   0.0033
 'International Tables Vol C Tables 4.2.6.8 and 6.1.1.4'
 'C'  'C'   0.0033   0.0016
 'International Tables Vol C Tables 4.2.6.8 and 6.1.1.4'
 'H'  'H'   0.0000   0.0000
 'International Tables Vol C Tables 4.2.6.8 and 6.1.1.4'
 
_symmetry_cell_setting            Monoclinic
_symmetry_space_group_name_H-M    P21/n
 
loop_
 _symmetry_equiv_pos_as_xyz
 'x, y, z'
 '-x+1/2, y+1/2, -z+1/2'
 '-x, -y, -z'
 'x-1/2, -y-1/2, z-1/2'
 
_cell_length_a                    12.789(5)
_cell_length_b                    20.362(5)
_cell_length_c                    17.377(5)
_cell_angle_alpha                 90
_cell_angle_beta                  94.277(5)
_cell_angle_gamma                 90
_cell_volume                      4513(2)
_cell_formula_units_Z             2
_cell_measurement_temperature     100
_cell_measurement_reflns_used     ?
_cell_measurement_theta_min        3.09
_cell_measurement_theta_max       30.45
 
_exptl_crystal_description        Block
_exptl_crystal_colour             white
_exptl_crystal_size_max           0.20
_exptl_crystal_size_mid           0.10
_exptl_crystal_size_min           0.08
_exptl_crystal_density_meas       ?
_exptl_crystal_density_diffrn     1.425
_exptl_crystal_density_method     'not measured'
_exptl_crystal_F_000              1976
_exptl_absorpt_coefficient_mu     1.695
_exptl_absorpt_correction_type    Empirical
_exptl_absorpt_correction_T_min   0.7394
_exptl_absorpt_correction_T_max   0.8822
_exptl_absorpt_process_details    ?
 
_exptl_special_details
;
 ?
;
 
_diffrn_ambient_temperature      100(2)
_diffrn_radiation_probe          x-ray
_diffrn_radiation_type           MoK\a
_diffrn_radiation_wavelength     0.71073
_diffrn_source                   'fine-focus sealed tube'
_diffrn_radiation_monochromator  graphite
_diffrn_measurement_device_type  ?
_diffrn_measurement_method       /w-scans
_diffrn_detector_area_resol_mean  ?
_diffrn_standards_number          ?
_diffrn_standards_interval_count  ?
_diffrn_standards_interval_time   ?
_diffrn_standards_decay_%         ?
_diffrn_reflns_number             91068
_diffrn_reflns_av_R_equivalents   0.0904
_diffrn_reflns_av_sigmaI/netI     0.0894
_diffrn_reflns_limit_h_min        -18
_diffrn_reflns_limit_h_max        18
_diffrn_reflns_limit_k_min        -29
_diffrn_reflns_limit_k_max        29
_diffrn_reflns_limit_l_min        -24
_diffrn_reflns_limit_l_max        24
_diffrn_reflns_theta_min          3.09
_diffrn_reflns_theta_max          30.45
_reflns_number_total              13659
_reflns_number_gt                 8613
_reflns_threshold_expression      >2sigma(I)
 
_computing_data_collection       'RAPID-AUTO (Rigaku, 1998)'
_computing_cell_refinement       'RAPID-AUTO (Rigaku, 1998'
_computing_data_reduction        'teXan (Rigaku/MSC, 2004))'
_computing_structure_solution    'SIR-97'
_computing_structure_refinement  'SHELXL-97 (Sheldrick, 1997)'
_computing_molecular_graphics    'ORTEP32'
_computing_publication_material  ?
 
_refine_special_details
;
 Refinement of F^2^ against ALL reflections.  The weighted R-factor wR and
 goodness of fit S are based on F^2^, conventional R-factors R are based
 on F, with F set to zero for negative F^2^. The threshold expression of
 F^2^ > 2sigma(F^2^) is used only for calculating R-factors(gt) etc. and is
 not relevant to the choice of reflections for refinement.  R-factors based
 on F^2^ are statistically about twice as large as those based on F, and R-
 factors based on ALL data will be even larger.
;
 
_refine_ls_structure_factor_coef  Fsqd
_refine_ls_matrix_type            full
_refine_ls_weighting_scheme       calc
_refine_ls_weighting_details
 'calc w=1/[\s^2^(Fo^2^)+(0.1156P)^2^+2.5955P] where P=(Fo^2^+2Fc^2^)/3'
_atom_sites_solution_primary      direct
_atom_sites_solution_secondary    difmap
_atom_sites_solution_hydrogens    geom
_refine_ls_hydrogen_treatment     constr
_refine_ls_extinction_method      none
_refine_ls_extinction_coef        ?
_refine_ls_number_reflns          13659
_refine_ls_number_parameters      468
_refine_ls_number_restraints      0
_refine_ls_R_factor_all           0.1248
_refine_ls_R_factor_gt            0.0741
_refine_ls_wR_factor_ref          0.2287
_refine_ls_wR_factor_gt           0.1672
_refine_ls_goodness_of_fit_ref    1.119
_refine_ls_restrained_S_all       1.119
_refine_ls_shift/su_max           0.001
_refine_ls_shift/su_mean          0.000
 
loop_
 _atom_site_label
 _atom_site_type_symbol
 _atom_site_fract_x
 _atom_site_fract_y
 _atom_site_fract_z
 _atom_site_U_iso_or_equiv
 _atom_site_adp_type
 _atom_site_occupancy
 _atom_site_symmetry_multiplicity
 _atom_site_calc_flag
 _atom_site_refinement_flags
 _atom_site_disorder_assembly
 _atom_site_disorder_group
Ba1 Ba 0.38180(3) 0.921647(18) 0.89592(2) 0.02445(12) Uani 1 1 d . . .
I1 I 0.56692(4) 1.05284(2) 0.90101(2) 0.03461(14) Uani 1 1 d . . .
K1 K 0.49491(12) 0.99604(8) 0.71169(8) 0.0358(3) Uani 1 1 d . . .
O1 O 0.1770(3) 0.8829(2) 0.9202(3) 0.0358(11) Uani 1 1 d . . .
O2 O 0.3762(4) 0.7969(2) 0.9583(3) 0.0382(11) Uani 1 1 d . . .
O3 O 0.7020(4) 0.9848(3) 0.6954(4) 0.0573(15) Uani 1 1 d . . .
O4 O 0.4865(5) 1.1231(3) 0.6705(3) 0.0584(16) Uani 1 1 d . . .
N1 N 0.2856(4) 0.9742(2) 0.7656(3) 0.0253(10) Uani 1 1 d . . .
N2 N 0.4503(4) 0.8683(2) 0.7698(3) 0.0262(11) Uani 1 1 d . . .
C1 C 0.2691(5) 0.9081(3) 0.7439(3) 0.0263(13) Uani 1 1 d . . .
H1 H 0.2009 0.8961 0.7276 0.032 Uiso 1 1 calc R . .
C2 C 0.3432(5) 0.8601(3) 0.7447(3) 0.0254(12) Uani 1 1 d . . .
H2 H 0.3218 0.8187 0.7273 0.030 Uiso 1 1 calc R . .
C3 C 0.2092(5) 1.0183(3) 0.7381(4) 0.0264(12) Uani 1 1 d . . .
C4 C 0.1864(5) 1.0738(3) 0.7838(4) 0.0298(13) Uani 1 1 d . . .
C5 C 0.1043(6) 1.1163(3) 0.7624(4) 0.0365(15) Uani 1 1 d . . .
H5 H 0.0897 1.1515 0.7940 0.044 Uiso 1 1 calc R . .
C6 C 0.0436(6) 1.1059(4) 0.6928(4) 0.0387(16) Uani 1 1 d . . .
H6 H -0.0138 1.1327 0.6794 0.046 Uiso 1 1 calc R . .
C7 C 0.0689(6) 1.0565(4) 0.6450(4) 0.0382(16) Uani 1 1 d . . .
H7 H 0.0289 1.0508 0.5985 0.046 Uiso 1 1 calc R . .
C8 C 0.1532(5) 1.0138(3) 0.6632(4) 0.0335(14) Uani 1 1 d . . .
C9 C 0.1858(5) 0.9682(3) 0.5995(4) 0.0326(14) Uani 1 1 d . . .
H9 H 0.2465 0.9430 0.6208 0.039 Uiso 1 1 calc R . .
C10 C 0.1008(6) 0.9188(4) 0.5724(5) 0.0438(18) Uani 1 1 d . . .
H10A H 0.0911 0.8879 0.6130 0.066 Uiso 1 1 calc R . .
H10B H 0.1218 0.8959 0.5278 0.066 Uiso 1 1 calc R . .
H10C H 0.0362 0.9417 0.5595 0.066 Uiso 1 1 calc R . .
C11 C 0.2212(7) 1.0077(4) 0.5306(4) 0.0470(19) Uani 1 1 d . . .
H11A H 0.1637 1.0335 0.5087 0.071 Uiso 1 1 calc R . .
H11B H 0.2440 0.9780 0.4923 0.071 Uiso 1 1 calc R . .
H11C H 0.2782 1.0361 0.5478 0.071 Uiso 1 1 calc R . .
C12 C 0.2516(6) 1.0849(3) 0.8600(4) 0.0330(14) Uani 1 1 d . . .
H12 H 0.3224 1.0687 0.8531 0.040 Uiso 1 1 calc R . .
C13 C 0.2619(7) 1.1578(4) 0.8829(5) 0.054(2) Uani 1 1 d . . .
H13A H 0.1992 1.1719 0.9052 0.081 Uiso 1 1 calc R . .
H13B H 0.2722 1.1837 0.8379 0.081 Uiso 1 1 calc R . .
H13C H 0.3208 1.1633 0.9199 0.081 Uiso 1 1 calc R . .
C14 C 0.2114(6) 1.0471(4) 0.9258(5) 0.0446(18) Uani 1 1 d . . .
H14A H 0.1445 1.0644 0.9374 0.067 Uiso 1 1 calc R . .
H14B H 0.2600 1.0510 0.9703 0.067 Uiso 1 1 calc R . .
H14C H 0.2039 1.0017 0.9116 0.067 Uiso 1 1 calc R . .
C15 C 0.5176(5) 0.8254(3) 0.7336(4) 0.0292(13) Uani 1 1 d . . .
C16 C 0.5950(5) 0.7902(3) 0.7798(4) 0.0295(13) Uani 1 1 d . . .
C17 C 0.6588(5) 0.7450(4) 0.7457(4) 0.0387(16) Uani 1 1 d . . .
H17 H 0.7084 0.7216 0.7765 0.046 Uiso 1 1 calc R . .
C18 C 0.6499(6) 0.7342(4) 0.6672(4) 0.050(2) Uani 1 1 d . . .
H18 H 0.6917 0.7029 0.6454 0.060 Uiso 1 1 calc R . .
C19 C 0.5776(6) 0.7707(4) 0.6205(4) 0.0421(18) Uani 1 1 d . . .
H19 H 0.5721 0.7640 0.5674 0.051 Uiso 1 1 calc R . .
C20 C 0.5135(5) 0.8169(3) 0.6529(4) 0.0321(14) Uani 1 1 d . . .
C21 C 0.6083(5) 0.8023(3) 0.8664(4) 0.0301(13) Uani 1 1 d . . .
H21 H 0.5381 0.8080 0.8843 0.036 Uiso 1 1 calc R . .
C22 C 0.6673(8) 0.8659(4) 0.8822(5) 0.058(2) Uani 1 1 d . . .
H22A H 0.7395 0.8600 0.8723 0.087 Uiso 1 1 calc R . .
H22B H 0.6626 0.8783 0.9351 0.087 Uiso 1 1 calc R . .
H22C H 0.6370 0.8998 0.8491 0.087 Uiso 1 1 calc R . .
C23 C 0.6615(6) 0.7465(4) 0.9142(4) 0.0413(17) Uani 1 1 d . . .
H23A H 0.6229 0.7065 0.9047 0.062 Uiso 1 1 calc R . .
H23B H 0.6628 0.7573 0.9681 0.062 Uiso 1 1 calc R . .
H23C H 0.7320 0.7408 0.8998 0.062 Uiso 1 1 calc R . .
C24 C 0.4456(5) 0.8595(3) 0.5963(3) 0.0296(14) Uani 1 1 d . . .
H24 H 0.4095 0.8915 0.6270 0.036 Uiso 1 1 calc R . .
C25 C 0.3609(6) 0.8201(3) 0.5491(4) 0.0380(16) Uani 1 1 d . . .
H25A H 0.3936 0.7869 0.5199 0.057 Uiso 1 1 calc R . .
H25B H 0.3211 0.8491 0.5146 0.057 Uiso 1 1 calc R . .
H25C H 0.3152 0.7997 0.5834 0.057 Uiso 1 1 calc R . .
C26 C 0.5130(6) 0.8983(4) 0.5427(4) 0.0412(16) Uani 1 1 d . . .
H26A H 0.5666 0.9217 0.5730 0.062 Uiso 1 1 calc R . .
H26B H 0.4696 0.9290 0.5131 0.062 Uiso 1 1 calc R . .
H26C H 0.5448 0.8686 0.5085 0.062 Uiso 1 1 calc R . .
C27 C 0.0766(5) 0.8908(5) 0.8783(5) 0.049(2) Uani 1 1 d . . .
H27A H 0.0652 0.8563 0.8401 0.058 Uiso 1 1 calc R . .
H27B H 0.0728 0.9329 0.8522 0.058 Uiso 1 1 calc R . .
C28 C -0.0047(7) 0.8870(8) 0.9374(6) 0.095(5) Uani 1 1 d . . .
H28A H -0.0555 0.9222 0.9295 0.114 Uiso 1 1 calc R . .
H28B H -0.0414 0.8453 0.9336 0.114 Uiso 1 1 calc R . .
C29 C 0.0548(7) 0.8936(5) 1.0138(5) 0.058(2) Uani 1 1 d . . .
H29A H 0.0226 0.8681 1.0529 0.070 Uiso 1 1 calc R . .
H29B H 0.0593 0.9392 1.0300 0.070 Uiso 1 1 calc R . .
C30 C 0.1602(6) 0.8670(4) 0.9989(4) 0.0457(18) Uani 1 1 d . . .
H30A H 0.2140 0.8868 1.0337 0.055 Uiso 1 1 calc R . .
H30B H 0.1620 0.8198 1.0064 0.055 Uiso 1 1 calc R . .
C31 C 0.4119(7) 0.7642(4) 1.0290(5) 0.0491(19) Uani 1 1 d . . .
H31A H 0.3776 0.7824 1.0721 0.059 Uiso 1 1 calc R . .
H31B H 0.4871 0.7694 1.0390 0.059 Uiso 1 1 calc R . .
C32 C 0.3848(10) 0.6942(5) 1.0186(7) 0.083(3) Uani 1 1 d . . .
H32A H 0.3618 0.6758 1.0660 0.100 Uiso 1 1 calc R . .
H32B H 0.4448 0.6693 1.0037 0.100 Uiso 1 1 calc R . .
C33 C 0.2987(7) 0.6924(4) 0.9566(6) 0.058(2) Uani 1 1 d . . .
H33A H 0.2312 0.7008 0.9767 0.070 Uiso 1 1 calc R . .
H33B H 0.2963 0.6506 0.9297 0.070 Uiso 1 1 calc R . .
C34 C 0.3299(7) 0.7472(4) 0.9054(5) 0.052(2) Uani 1 1 d . . .
H34A H 0.3806 0.7321 0.8705 0.062 Uiso 1 1 calc R . .
H34B H 0.2693 0.7647 0.8753 0.062 Uiso 1 1 calc R . .
C35 C 0.7747(7) 1.0331(5) 0.7297(6) 0.066(3) Uani 1 1 d . . .
H35A H 0.7392 1.0636 0.7620 0.079 Uiso 1 1 calc R . .
H35B H 0.8075 1.0578 0.6903 0.079 Uiso 1 1 calc R . .
C36 C 0.8556(8) 0.9924(5) 0.7780(6) 0.070(3) Uani 1 1 d . . .
H36A H 0.9221 1.0153 0.7851 0.084 Uiso 1 1 calc R . .
H36B H 0.8312 0.9821 0.8281 0.084 Uiso 1 1 calc R . .
C37 C 0.8656(8) 0.9312(6) 0.7306(7) 0.080(3) Uani 1 1 d . . .
H37A H 0.8757 0.8928 0.7635 0.095 Uiso 1 1 calc R . .
H37B H 0.9240 0.9346 0.6983 0.095 Uiso 1 1 calc R . .
C38 C 0.7602(7) 0.9271(5) 0.6810(5) 0.052(2) Uani 1 1 d . . .
H38A H 0.7728 0.9244 0.6267 0.063 Uiso 1 1 calc R . .
H38B H 0.7216 0.8884 0.6947 0.063 Uiso 1 1 calc R . .
C39 C 0.4068(9) 1.1579(6) 0.7046(9) 0.092(4) Uani 1 1 d . . .
H39A H 0.3790 1.1310 0.7444 0.110 Uiso 1 1 calc R . .
H39B H 0.3502 1.1672 0.6659 0.110 Uiso 1 1 calc R . .
C40 C 0.4465(9) 1.2186(7) 0.7380(13) 0.145(8) Uani 1 1 d . . .
H40A H 0.4079 1.2558 0.7156 0.174 Uiso 1 1 calc R . .
H40B H 0.4410 1.2189 0.7934 0.174 Uiso 1 1 calc R . .
C41 C 0.5547(11) 1.2210(7) 0.7202(11) 0.130(7) Uani 1 1 d . . .
H41A H 0.5692 1.2624 0.6956 0.156 Uiso 1 1 calc R . .
H41B H 0.6003 1.2173 0.7672 0.156 Uiso 1 1 calc R . .
C42 C 0.5733(10) 1.1673(6) 0.6692(7) 0.091(4) Uani 1 1 d . . .
H42A H 0.5793 1.1835 0.6172 0.110 Uiso 1 1 calc R . .
H42B H 0.6379 1.1450 0.6861 0.110 Uiso 1 1 calc R . .
 
loop_
 _atom_site_aniso_label
 _atom_site_aniso_U_11
 _atom_site_aniso_U_22
 _atom_site_aniso_U_33
 _atom_site_aniso_U_23
 _atom_site_aniso_U_13
 _atom_site_aniso_U_12
Ba1 0.02552(19) 0.0264(2) 0.02134(19) -0.00056(13) 0.00091(14) -0.00018(13)
I1 0.0402(3) 0.0380(3) 0.0252(2) -0.00138(17) -0.00071(18) -0.00968(19)
K1 0.0389(8) 0.0394(8) 0.0296(7) -0.0002(6) 0.0059(6) -0.0101(6)
O1 0.030(2) 0.045(3) 0.033(2) 0.004(2) 0.0041(19) 0.002(2)
O2 0.046(3) 0.030(2) 0.040(3) 0.007(2) 0.005(2) -0.005(2)
O3 0.039(3) 0.073(4) 0.060(4) -0.005(3) 0.006(3) -0.006(3)
O4 0.085(5) 0.043(3) 0.048(3) 0.003(3) 0.013(3) -0.019(3)
N1 0.029(3) 0.023(2) 0.024(2) -0.001(2) 0.000(2) 0.000(2)
N2 0.022(2) 0.025(2) 0.031(3) -0.003(2) -0.003(2) 0.003(2)
C1 0.026(3) 0.025(3) 0.026(3) -0.004(2) -0.008(2) 0.001(2)
C2 0.030(3) 0.022(3) 0.024(3) -0.003(2) -0.001(2) -0.001(2)
C3 0.024(3) 0.026(3) 0.029(3) 0.003(2) -0.002(2) 0.002(2)
C4 0.032(3) 0.030(3) 0.029(3) 0.001(3) 0.007(3) 0.004(3)
C5 0.044(4) 0.033(4) 0.034(4) 0.003(3) 0.011(3) 0.007(3)
C6 0.039(4) 0.033(4) 0.044(4) 0.010(3) 0.005(3) 0.006(3)
C7 0.036(4) 0.040(4) 0.038(4) 0.007(3) -0.008(3) 0.010(3)
C8 0.031(3) 0.039(4) 0.031(3) 0.007(3) 0.003(3) -0.001(3)
C9 0.035(3) 0.032(3) 0.030(3) -0.003(3) 0.000(3) 0.005(3)
C10 0.046(4) 0.047(4) 0.037(4) -0.009(3) -0.002(3) -0.002(3)
C11 0.061(5) 0.048(4) 0.032(4) 0.003(3) 0.005(3) 0.012(4)
C12 0.037(4) 0.025(3) 0.036(4) -0.007(3) 0.003(3) 0.001(3)
C13 0.074(6) 0.034(4) 0.052(5) -0.015(4) -0.003(4) 0.003(4)
C14 0.046(4) 0.043(4) 0.047(4) -0.005(3) 0.011(3) 0.010(3)
C15 0.025(3) 0.034(3) 0.028(3) -0.006(3) 0.003(2) -0.005(3)
C16 0.025(3) 0.034(3) 0.029(3) -0.003(3) 0.002(2) 0.001(3)
C17 0.033(4) 0.047(4) 0.035(4) -0.003(3) -0.006(3) 0.011(3)
C18 0.048(4) 0.064(5) 0.040(4) -0.017(4) 0.010(3) 0.020(4)
C19 0.045(4) 0.054(5) 0.026(3) -0.009(3) -0.003(3) 0.014(4)
C20 0.034(3) 0.035(3) 0.027(3) -0.002(3) 0.001(3) 0.006(3)
C21 0.028(3) 0.035(3) 0.027(3) 0.004(3) 0.002(2) 0.008(3)
C22 0.082(6) 0.047(5) 0.041(4) 0.001(4) -0.025(4) -0.004(4)
C23 0.043(4) 0.046(4) 0.034(4) 0.003(3) -0.005(3) -0.001(3)
C24 0.038(3) 0.034(3) 0.016(3) -0.004(2) -0.002(2) 0.003(3)
C25 0.046(4) 0.033(4) 0.034(3) -0.006(3) -0.006(3) 0.003(3)
C26 0.046(4) 0.046(4) 0.033(4) 0.001(3) 0.008(3) -0.007(3)
C27 0.026(3) 0.075(6) 0.044(4) -0.001(4) -0.001(3) -0.007(4)
C28 0.035(5) 0.201(15) 0.051(6) 0.010(7) 0.007(4) 0.011(7)
C29 0.050(5) 0.078(6) 0.048(5) 0.010(5) 0.014(4) 0.018(5)
C30 0.035(4) 0.055(5) 0.048(4) 0.017(4) 0.008(3) 0.002(3)
C31 0.057(5) 0.047(5) 0.042(4) 0.012(4) -0.001(4) 0.004(4)
C32 0.108(9) 0.053(6) 0.086(8) 0.025(6) -0.010(7) 0.003(6)
C33 0.058(5) 0.031(4) 0.087(7) 0.005(4) 0.017(5) -0.006(4)
C34 0.059(5) 0.037(4) 0.059(5) -0.008(4) -0.004(4) -0.001(4)
C35 0.050(5) 0.073(6) 0.077(6) 0.012(5) 0.013(5) -0.021(5)
C36 0.058(6) 0.080(7) 0.068(6) 0.021(6) -0.013(5) -0.022(5)
C37 0.042(5) 0.105(9) 0.091(8) 0.014(7) -0.003(5) -0.002(5)
C38 0.043(4) 0.071(6) 0.043(4) 0.008(4) 0.004(4) -0.002(4)
C39 0.055(6) 0.086(8) 0.137(11) -0.001(8) 0.023(7) -0.009(6)
C40 0.063(7) 0.080(9) 0.30(2) -0.048(12) 0.082(11) -0.017(7)
C41 0.091(9) 0.085(9) 0.221(19) -0.074(11) 0.068(11) -0.035(7)
C42 0.100(9) 0.079(8) 0.101(9) -0.025(7) 0.053(7) -0.049(7)
 
_geom_special_details
;
 All esds (except the esd in the dihedral angle between two l.s. planes)
 are estimated using the full covariance matrix.  The cell esds are taken
 into account individually in the estimation of esds in distances, angles
 and torsion angles; correlations between esds in cell parameters are only
 used when they are defined by crystal symmetry.  An approximate (isotropic)
 treatment of cell esds is used for estimating esds involving l.s. planes.
;
 
loop_
 _geom_bond_atom_site_label_1
 _geom_bond_atom_site_label_2
 _geom_bond_distance
 _geom_bond_site_symmetry_2
 _geom_bond_publ_flag
Ba1 N2 2.652(5) . ?
Ba1 N1 2.716(5) . ?
Ba1 O2 2.765(5) . ?
Ba1 O1 2.797(5) . ?
Ba1 C2 2.920(6) . ?
Ba1 C1 2.926(6) . ?
Ba1 I1 3.5662(10) . ?
Ba1 I1 3.5786(11) 3_677 ?
Ba1 K1 3.9149(17) . ?
I1 K1 3.5436(17) . ?
I1 Ba1 3.5786(11) 3_677 ?
K1 O4 2.684(6) . ?
K1 O3 2.694(6) . ?
K1 N2 2.863(5) . ?
K1 N1 2.935(6) . ?
K1 C2 3.452(6) . ?
K1 C1 3.479(7) . ?
O1 C27 1.437(8) . ?
O1 C30 1.437(9) . ?
O2 C31 1.441(9) . ?
O2 C34 1.463(9) . ?
O3 C38 1.423(11) . ?
O3 C35 1.452(11) . ?
O4 C39 1.408(13) . ?
O4 C42 1.431(11) . ?
N1 C3 1.385(7) . ?
N1 C1 1.409(8) . ?
N2 C15 1.407(8) . ?
N2 C2 1.416(7) . ?
C1 C2 1.360(8) . ?
C1 H1 0.9300 . ?
C2 H2 0.9300 . ?
C3 C4 1.425(9) . ?
C3 C8 1.441(8) . ?
C4 C5 1.390(9) . ?
C4 C12 1.528(9) . ?
C5 C6 1.404(10) . ?
C5 H5 0.9300 . ?
C6 C7 1.358(10) . ?
C6 H6 0.9300 . ?
C7 C8 1.403(9) . ?
C7 H7 0.9300 . ?
C8 C9 1.526(9) . ?
C9 C10 1.529(10) . ?
C9 C11 1.538(10) . ?
C9 H9 0.9800 . ?
C10 H10A 0.9600 . ?
C10 H10B 0.9600 . ?
C10 H10C 0.9600 . ?
C11 H11A 0.9600 . ?
C11 H11B 0.9600 . ?
C11 H11C 0.9600 . ?
C12 C14 1.500(11) . ?
C12 C13 1.541(10) . ?
C12 H12 0.9800 . ?
C13 H13A 0.9600 . ?
C13 H13B 0.9600 . ?
C13 H13C 0.9600 . ?
C14 H14A 0.9600 . ?
C14 H14B 0.9600 . ?
C14 H14C 0.9600 . ?
C15 C20 1.411(9) . ?
C15 C16 1.421(9) . ?
C16 C17 1.392(9) . ?
C16 C21 1.522(9) . ?
C17 C18 1.378(10) . ?
C17 H17 0.9300 . ?
C18 C19 1.398(11) . ?
C18 H18 0.9300 . ?
C19 C20 1.394(10) . ?
C19 H19 0.9300 . ?
C20 C24 1.531(9) . ?
C21 C22 1.514(11) . ?
C21 C23 1.536(9) . ?
C21 H21 0.9800 . ?
C22 H22A 0.9600 . ?
C22 H22B 0.9600 . ?
C22 H22C 0.9600 . ?
C23 H23A 0.9600 . ?
C23 H23B 0.9600 . ?
C23 H23C 0.9600 . ?
C24 C26 1.534(10) . ?
C24 C25 1.534(9) . ?
C24 H24 0.9800 . ?
C25 H25A 0.9600 . ?
C25 H25B 0.9600 . ?
C25 H25C 0.9600 . ?
C26 H26A 0.9600 . ?
C26 H26B 0.9600 . ?
C26 H26C 0.9600 . ?
C27 C28 1.517(12) . ?
C27 H27A 0.9700 . ?
C27 H27B 0.9700 . ?
C28 C29 1.487(13) . ?
C28 H28A 0.9700 . ?
C28 H28B 0.9700 . ?
C29 C30 1.494(11) . ?
C29 H29A 0.9700 . ?
C29 H29B 0.9700 . ?
C30 H30A 0.9700 . ?
C30 H30B 0.9700 . ?
C31 C32 1.476(13) . ?
C31 H31A 0.9700 . ?
C31 H31B 0.9700 . ?
C32 C33 1.483(13) . ?
C32 H32A 0.9700 . ?
C32 H32B 0.9700 . ?
C33 C34 1.499(12) . ?
C33 H33A 0.9700 . ?
C33 H33B 0.9700 . ?
C34 H34A 0.9700 . ?
C34 H34B 0.9700 . ?
C35 C36 1.528(13) . ?
C35 H35A 0.9700 . ?
C35 H35B 0.9700 . ?
C36 C37 1.504(16) . ?
C36 H36A 0.9700 . ?
C36 H36B 0.9700 . ?
C37 C38 1.547(12) . ?
C37 H37A 0.9700 . ?
C37 H37B 0.9700 . ?
C38 H38A 0.9700 . ?
C38 H38B 0.9700 . ?
C39 C40 1.443(17) . ?
C39 H39A 0.9700 . ?
C39 H39B 0.9700 . ?
C40 C41 1.442(16) . ?
C40 H40A 0.9700 . ?
C40 H40B 0.9700 . ?
C41 C42 1.439(16) . ?
C41 H41A 0.9700 . ?
C41 H41B 0.9700 . ?
C42 H42A 0.9700 . ?
C42 H42B 0.9700 . ?
 
loop_
 _geom_angle_atom_site_label_1
 _geom_angle_atom_site_label_2
 _geom_angle_atom_site_label_3
 _geom_angle
 _geom_angle_site_symmetry_1
 _geom_angle_site_symmetry_3
 _geom_angle_publ_flag
N2 Ba1 N1 68.23(15) . . ?
N2 Ba1 O2 88.15(16) . . ?
N1 Ba1 O2 131.74(15) . . ?
N2 Ba1 O1 112.33(15) . . ?
N1 Ba1 O1 82.30(15) . . ?
O2 Ba1 O1 68.27(14) . . ?
N2 Ba1 C2 28.93(15) . . ?
N1 Ba1 C2 51.87(16) . . ?
O2 Ba1 C2 87.21(16) . . ?
O1 Ba1 C2 85.27(16) . . ?
N2 Ba1 C1 52.15(16) . . ?
N1 Ba1 C1 28.62(15) . . ?
O2 Ba1 C1 104.00(16) . . ?
O1 Ba1 C1 72.90(16) . . ?
C2 Ba1 C1 26.91(16) . . ?
N2 Ba1 I1 93.88(11) . . ?
N1 Ba1 I1 89.09(11) . . ?
O2 Ba1 I1 135.65(10) . . ?
O1 Ba1 I1 146.60(10) . . ?
C2 Ba1 I1 114.27(12) . . ?
C1 Ba1 I1 111.99(13) . . ?
N2 Ba1 I1 145.75(10) . 3_677 ?
N1 Ba1 I1 143.48(11) . 3_677 ?
O2 Ba1 I1 75.81(10) . 3_677 ?
O1 Ba1 I1 89.83(10) . 3_677 ?
C2 Ba1 I1 162.94(12) . 3_677 ?
C1 Ba1 I1 160.99(13) . 3_677 ?
I1 Ba1 I1 78.128(15) . 3_677 ?
N2 Ba1 K1 46.99(12) . . ?
N1 Ba1 K1 48.50(11) . . ?
O2 Ba1 K1 134.28(11) . . ?
O1 Ba1 K1 129.77(10) . . ?
C2 Ba1 K1 58.53(12) . . ?
C1 Ba1 K1 59.04(13) . . ?
I1 Ba1 K1 56.31(3) . . ?
I1 Ba1 K1 134.30(3) 3_677 . ?
K1 I1 Ba1 66.82(3) . . ?
K1 I1 Ba1 168.14(3) . 3_677 ?
Ba1 I1 Ba1 101.872(15) . 3_677 ?
O4 K1 O3 94.2(2) . . ?
O4 K1 N2 164.71(19) . . ?
O3 K1 N2 100.56(18) . . ?
O4 K1 N1 102.23(19) . . ?
O3 K1 N1 161.41(18) . . ?
N2 K1 N1 62.57(15) . . ?
O4 K1 C2 143.62(19) . . ?
O3 K1 C2 121.22(18) . . ?
N2 K1 C2 23.64(13) . . ?
N1 K1 C2 44.63(14) . . ?
O4 K1 C1 121.46(18) . . ?
O3 K1 C1 143.85(18) . . ?
N2 K1 C1 44.42(14) . . ?
N1 K1 C1 23.48(14) . . ?
C2 K1 C1 22.63(14) . . ?
O4 K1 I1 86.30(13) . . ?
O3 K1 I1 86.33(13) . . ?
N2 K1 I1 90.79(11) . . ?
N1 K1 I1 86.18(10) . . ?
C2 K1 I1 102.59(10) . . ?
C1 K1 I1 100.36(11) . . ?
O4 K1 Ba1 125.53(15) . . ?
O3 K1 Ba1 118.64(14) . . ?
N2 K1 Ba1 42.65(11) . . ?
N1 K1 Ba1 43.87(10) . . ?
C2 K1 Ba1 46.18(10) . . ?
C1 K1 Ba1 46.16(10) . . ?
I1 K1 Ba1 56.87(3) . . ?
C27 O1 C30 108.4(5) . . ?
C27 O1 Ba1 134.7(4) . . ?
C30 O1 Ba1 114.6(4) . . ?
C31 O2 C34 107.7(6) . . ?
C31 O2 Ba1 138.0(4) . . ?
C34 O2 Ba1 114.2(4) . . ?
C38 O3 C35 107.7(7) . . ?
C38 O3 K1 128.4(5) . . ?
C35 O3 K1 120.2(6) . . ?
C39 O4 C42 106.0(8) . . ?
C39 O4 K1 112.9(6) . . ?
C42 O4 K1 126.6(7) . . ?
C3 N1 C1 116.1(5) . . ?
C3 N1 Ba1 143.8(4) . . ?
C1 N1 Ba1 84.0(3) . . ?
C3 N1 K1 115.4(4) . . ?
C1 N1 K1 100.5(4) . . ?
Ba1 N1 K1 87.63(14) . . ?
C15 N2 C2 113.5(5) . . ?
C15 N2 Ba1 150.9(4) . . ?
C2 N2 Ba1 86.1(3) . . ?
C15 N2 K1 105.2(4) . . ?
C2 N2 K1 102.2(3) . . ?
Ba1 N2 K1 90.36(15) . . ?
C2 C1 N1 126.4(5) . . ?
C2 C1 Ba1 76.3(3) . . ?
N1 C1 Ba1 67.4(3) . . ?
C2 C1 K1 77.6(4) . . ?
N1 C1 K1 56.1(3) . . ?
Ba1 C1 K1 74.81(13) . . ?
C2 C1 H1 116.8 . . ?
N1 C1 H1 116.8 . . ?
Ba1 C1 H1 133.5 . . ?
K1 C1 H1 149.0 . . ?
C1 C2 N2 125.1(5) . . ?
C1 C2 Ba1 76.8(3) . . ?
N2 C2 Ba1 65.0(3) . . ?
C1 C2 K1 79.8(4) . . ?
N2 C2 K1 54.1(3) . . ?
Ba1 C2 K1 75.29(13) . . ?
C1 C2 H2 117.4 . . ?
N2 C2 H2 117.4 . . ?
Ba1 C2 H2 135.0 . . ?
K1 C2 H2 145.9 . . ?
N1 C3 C4 119.4(5) . . ?
N1 C3 C8 124.1(6) . . ?
C4 C3 C8 116.4(5) . . ?
C5 C4 C3 121.8(6) . . ?
C5 C4 C12 119.5(6) . . ?
C3 C4 C12 118.7(5) . . ?
C4 C5 C6 119.7(7) . . ?
C4 C5 H5 120.2 . . ?
C6 C5 H5 120.2 . . ?
C7 C6 C5 119.8(6) . . ?
C7 C6 H6 120.1 . . ?
C5 C6 H6 120.1 . . ?
C6 C7 C8 122.4(6) . . ?
C6 C7 H7 118.8 . . ?
C8 C7 H7 118.8 . . ?
C7 C8 C3 119.1(6) . . ?
C7 C8 C9 117.5(6) . . ?
C3 C8 C9 123.3(6) . . ?
C8 C9 C10 113.4(6) . . ?
C8 C9 C11 111.0(6) . . ?
C10 C9 C11 110.4(6) . . ?
C8 C9 H9 107.3 . . ?
C10 C9 H9 107.3 . . ?
C11 C9 H9 107.3 . . ?
C9 C10 H10A 109.5 . . ?
C9 C10 H10B 109.5 . . ?
H10A C10 H10B 109.5 . . ?
C9 C10 H10C 109.5 . . ?
H10A C10 H10C 109.5 . . ?
H10B C10 H10C 109.5 . . ?
C9 C11 H11A 109.5 . . ?
C9 C11 H11B 109.5 . . ?
H11A C11 H11B 109.5 . . ?
C9 C11 H11C 109.5 . . ?
H11A C11 H11C 109.5 . . ?
H11B C11 H11C 109.5 . . ?
C14 C12 C4 112.9(6) . . ?
C14 C12 C13 109.0(6) . . ?
C4 C12 C13 113.4(6) . . ?
C14 C12 H12 107.1 . . ?
C4 C12 H12 107.1 . . ?
C13 C12 H12 107.1 . . ?
C12 C13 H13A 109.5 . . ?
C12 C13 H13B 109.5 . . ?
H13A C13 H13B 109.5 . . ?
C12 C13 H13C 109.5 . . ?
H13A C13 H13C 109.5 . . ?
H13B C13 H13C 109.5 . . ?
C12 C14 H14A 109.5 . . ?
C12 C14 H14B 109.5 . . ?
H14A C14 H14B 109.5 . . ?
C12 C14 H14C 109.5 . . ?
H14A C14 H14C 109.5 . . ?
H14B C14 H14C 109.5 . . ?
N2 C15 C20 122.8(6) . . ?
N2 C15 C16 119.0(5) . . ?
C20 C15 C16 118.2(6) . . ?
C17 C16 C15 120.0(6) . . ?
C17 C16 C21 120.1(6) . . ?
C15 C16 C21 119.9(6) . . ?
C18 C17 C16 121.3(6) . . ?
C18 C17 H17 119.4 . . ?
C16 C17 H17 119.4 . . ?
C17 C18 C19 119.4(7) . . ?
C17 C18 H18 120.3 . . ?
C19 C18 H18 120.3 . . ?
C20 C19 C18 120.6(6) . . ?
C20 C19 H19 119.7 . . ?
C18 C19 H19 119.7 . . ?
C19 C20 C15 120.3(6) . . ?
C19 C20 C24 116.5(6) . . ?
C15 C20 C24 123.2(6) . . ?
C22 C21 C16 109.6(6) . . ?
C22 C21 C23 109.9(6) . . ?
C16 C21 C23 115.4(6) . . ?
C22 C21 H21 107.2 . . ?
C16 C21 H21 107.2 . . ?
C23 C21 H21 107.2 . . ?
C21 C22 H22A 109.5 . . ?
C21 C22 H22B 109.5 . . ?
H22A C22 H22B 109.5 . . ?
C21 C22 H22C 109.5 . . ?
H22A C22 H22C 109.5 . . ?
H22B C22 H22C 109.5 . . ?
C21 C23 H23A 109.5 . . ?
C21 C23 H23B 109.5 . . ?
H23A C23 H23B 109.5 . . ?
C21 C23 H23C 109.5 . . ?
H23A C23 H23C 109.5 . . ?
H23B C23 H23C 109.5 . . ?
C20 C24 C26 111.4(6) . . ?
C20 C24 C25 113.0(6) . . ?
C26 C24 C25 110.6(5) . . ?
C20 C24 H24 107.2 . . ?
C26 C24 H24 107.2 . . ?
C25 C24 H24 107.2 . . ?
C24 C25 H25A 109.5 . . ?
C24 C25 H25B 109.5 . . ?
H25A C25 H25B 109.5 . . ?
C24 C25 H25C 109.5 . . ?
H25A C25 H25C 109.5 . . ?
H25B C25 H25C 109.5 . . ?
C24 C26 H26A 109.5 . . ?
C24 C26 H26B 109.5 . . ?
H26A C26 H26B 109.5 . . ?
C24 C26 H26C 109.5 . . ?
H26A C26 H26C 109.5 . . ?
H26B C26 H26C 109.5 . . ?
O1 C27 C28 106.5(6) . . ?
O1 C27 H27A 110.4 . . ?
C28 C27 H27A 110.4 . . ?
O1 C27 H27B 110.4 . . ?
C28 C27 H27B 110.4 . . ?
H27A C27 H27B 108.6 . . ?
C29 C28 C27 105.5(7) . . ?
C29 C28 H28A 110.6 . . ?
C27 C28 H28A 110.6 . . ?
C29 C28 H28B 110.6 . . ?
C27 C28 H28B 110.6 . . ?
H28A C28 H28B 108.8 . . ?
C28 C29 C30 102.8(8) . . ?
C28 C29 H29A 111.2 . . ?
C30 C29 H29A 111.2 . . ?
C28 C29 H29B 111.2 . . ?
C30 C29 H29B 111.2 . . ?
H29A C29 H29B 109.1 . . ?
O1 C30 C29 106.5(6) . . ?
O1 C30 H30A 110.4 . . ?
C29 C30 H30A 110.4 . . ?
O1 C30 H30B 110.4 . . ?
C29 C30 H30B 110.4 . . ?
H30A C30 H30B 108.6 . . ?
O2 C31 C32 106.6(7) . . ?
O2 C31 H31A 110.4 . . ?
C32 C31 H31A 110.4 . . ?
O2 C31 H31B 110.4 . . ?
C32 C31 H31B 110.4 . . ?
H31A C31 H31B 108.6 . . ?
C31 C32 C33 105.5(7) . . ?
C31 C32 H32A 110.6 . . ?
C33 C32 H32A 110.6 . . ?
C31 C32 H32B 110.6 . . ?
C33 C32 H32B 110.6 . . ?
H32A C32 H32B 108.8 . . ?
C32 C33 C34 101.4(7) . . ?
C32 C33 H33A 111.5 . . ?
C34 C33 H33A 111.5 . . ?
C32 C33 H33B 111.5 . . ?
C34 C33 H33B 111.5 . . ?
H33A C33 H33B 109.3 . . ?
O2 C34 C33 104.8(7) . . ?
O2 C34 H34A 110.8 . . ?
C33 C34 H34A 110.8 . . ?
O2 C34 H34B 110.8 . . ?
C33 C34 H34B 110.8 . . ?
H34A C34 H34B 108.9 . . ?
O3 C35 C36 104.1(8) . . ?
O3 C35 H35A 110.9 . . ?
C36 C35 H35A 110.9 . . ?
O3 C35 H35B 110.9 . . ?
C36 C35 H35B 110.9 . . ?
H35A C35 H35B 109.0 . . ?
C37 C36 C35 103.4(8) . . ?
C37 C36 H36A 111.1 . . ?
C35 C36 H36A 111.1 . . ?
C37 C36 H36B 111.1 . . ?
C35 C36 H36B 111.1 . . ?
H36A C36 H36B 109.1 . . ?
C36 C37 C38 104.1(8) . . ?
C36 C37 H37A 110.9 . . ?
C38 C37 H37A 110.9 . . ?
C36 C37 H37B 110.9 . . ?
C38 C37 H37B 110.9 . . ?
H37A C37 H37B 109.0 . . ?
O3 C38 C37 107.7(8) . . ?
O3 C38 H38A 110.2 . . ?
C37 C38 H38A 110.2 . . ?
O3 C38 H38B 110.2 . . ?
C37 C38 H38B 110.2 . . ?
H38A C38 H38B 108.5 . . ?
O4 C39 C40 111.0(9) . . ?
O4 C39 H39A 109.4 . . ?
C40 C39 H39A 109.4 . . ?
O4 C39 H39B 109.4 . . ?
C40 C39 H39B 109.4 . . ?
H39A C39 H39B 108.0 . . ?
C41 C40 C39 104.9(11) . . ?
C41 C40 H40A 110.8 . . ?
C39 C40 H40A 110.8 . . ?
C41 C40 H40B 110.8 . . ?
C39 C40 H40B 110.8 . . ?
H40A C40 H40B 108.9 . . ?
C42 C41 C40 108.2(11) . . ?
C42 C41 H41A 110.1 . . ?
C40 C41 H41A 110.1 . . ?
C42 C41 H41B 110.1 . . ?
C40 C41 H41B 110.1 . . ?
H41A C41 H41B 108.4 . . ?
O4 C42 C41 107.8(9) . . ?
O4 C42 H42A 110.2 . . ?
C41 C42 H42A 110.2 . . ?
O4 C42 H42B 110.2 . . ?
C41 C42 H42B 110.2 . . ?
H42A C42 H42B 108.5 . . ?
 
_diffrn_measured_fraction_theta_max    0.997
_diffrn_reflns_theta_full              30.45
_diffrn_measured_fraction_theta_full   0.997
_refine_diff_density_max    0.984
_refine_diff_density_min   -0.763
_refine_diff_density_rms    0.242

 
data_complex-3 
 
_audit_creation_method            SHELXL-97 
_chemical_name_systematic 
; 
 ? 
; 
_chemical_name_common           complex-3 
_chemical_melting_point           ? 
_chemical_formula_moiety          ? 
_chemical_formula_sum 
 'C74 H110 Ba2 I2 N4 O4' 
_chemical_formula_weight          1648.14 
 
loop_ 
 _atom_type_symbol 
 _atom_type_description 
 _atom_type_scat_dispersion_real 
 _atom_type_scat_dispersion_imag 
 _atom_type_scat_source 
 'C'  'C'   0.0033   0.0016 
 'International Tables Vol C Tables 4.2.6.8 and 6.1.1.4' 
 'H'  'H'   0.0000   0.0000 
 'International Tables Vol C Tables 4.2.6.8 and 6.1.1.4' 
 'N'  'N'   0.0061   0.0033 
 'International Tables Vol C Tables 4.2.6.8 and 6.1.1.4' 
 'O'  'O'   0.0106   0.0060 
 'International Tables Vol C Tables 4.2.6.8 and 6.1.1.4' 
 'Ba'  'Ba'  -0.3244   2.2819 
 'International Tables Vol C Tables 4.2.6.8 and 6.1.1.4' 
 'I'  'I'  -0.4742   1.8119 
 'International Tables Vol C Tables 4.2.6.8 and 6.1.1.4' 
 
_symmetry_cell_setting            triclinic
_symmetry_space_group_name_H-M    P-1
 
loop_ 
 _symmetry_equiv_pos_as_xyz 
 'x, y, z' 
 '-x, -y, -z' 
 
_cell_length_a                    11.4776(11) 
_cell_length_b                    12.6463(12) 
_cell_length_c                    15.0886(14) 
_cell_angle_alpha                 91.955(8) 
_cell_angle_beta                  100.815(7) 
_cell_angle_gamma                 115.211(7) 
_cell_volume                      1930.2(3) 
_cell_formula_units_Z             1 
_cell_measurement_temperature     173(2) 
_cell_measurement_reflns_used     21607
_cell_measurement_theta_min       4.77
_cell_measurement_theta_max       59.20
 
_exptl_crystal_description        block
_exptl_crystal_colour             orange
_exptl_crystal_size_max           0.30 
_exptl_crystal_size_mid           0.10 
_exptl_crystal_size_min           0.10 
_exptl_crystal_density_meas       ? 
_exptl_crystal_density_diffrn     1.418 
_exptl_crystal_density_method     'not measured' 
_exptl_crystal_F_000              832 
_exptl_absorpt_coefficient_mu     1.859 
_exptl_absorpt_correction_type    numerical
_exptl_absorpt_correction_T_min   0.62454
_exptl_absorpt_correction_T_max   1.04576
_exptl_absorpt_process_details    mulabs
 
_exptl_special_details 
; 
 ? 
; 
 
_diffrn_ambient_temperature       173(2) 
_diffrn_radiation_wavelength      0.71073 
_diffrn_radiation_type            MoK\a 
_diffrn_radiation_source          'fine-focus sealed tube' 
_diffrn_radiation_monochromator   graphite 
_diffrn_measurement_device_type   'Stoe-I PDS II'
_diffrn_measurement_method        'omega-scans'
_diffrn_detector_area_resol_mean  ? 
_diffrn_standards_number          ? 
_diffrn_standards_interval_count  ? 
_diffrn_standards_interval_time   ? 
_diffrn_standards_decay_%         ? 
_diffrn_reflns_number             26610 
_diffrn_reflns_av_R_equivalents   0.1453 
_diffrn_reflns_av_sigmaI/netI     0.0873 
_diffrn_reflns_limit_h_min        -13 
_diffrn_reflns_limit_h_max        13 
_diffrn_reflns_limit_k_min        -15 
_diffrn_reflns_limit_k_max        15 
_diffrn_reflns_limit_l_min        -18 
_diffrn_reflns_limit_l_max        18 
_diffrn_reflns_theta_min          2.40 
_diffrn_reflns_theta_max          25.68 
_reflns_number_total              7337 
_reflns_number_gt                 5962 
_reflns_threshold_expression      >2sigma(I) 
 
_computing_data_collection        'X-AREA'
_computing_cell_refinement        'X-AREA'
_computing_data_reduction         'X-AREA'
_computing_structure_solution     'SHELXS-97 (Sheldrick, 1990)' 
_computing_structure_refinement   'SHELXL-97 (Sheldrick, 1997)' 
_computing_molecular_graphics     ? 
_computing_publication_material   ? 
 
_refine_special_details 
; 
 Refinement of F^2^ against ALL reflections.  The weighted R-factor wR and 
 goodness of fit S are based on F^2^, conventional R-factors R are based 
 on F, with F set to zero for negative F^2^. The threshold expression of 
 F^2^ > 2sigma(F^2^) is used only for calculating R-factors(gt) etc. and is 
 not relevant to the choice of reflections for refinement.  R-factors based 
 on F^2^ are statistically about twice as large as those based on F, and R- 
 factors based on ALL data will be even larger. 
; 
 
_refine_ls_structure_factor_coef  Fsqd  
_refine_ls_matrix_type            full 
_refine_ls_weighting_scheme       calc  
_refine_ls_weighting_details 
 'calc w=1/[\s^2^(Fo^2^)+(0.0262P)^2^+2.7723P] where P=(Fo^2^+2Fc^2^)/3' 
_atom_sites_solution_primary      direct 
_atom_sites_solution_secondary    difmap 
_atom_sites_solution_hydrogens    geom 
_refine_ls_hydrogen_treatment     constr
_refine_ls_extinction_method      none 
_refine_ls_extinction_coef        ? 
_refine_ls_number_reflns          7337 
_refine_ls_number_parameters      372 
_refine_ls_number_restraints      0 
_refine_ls_R_factor_all           0.0658 
_refine_ls_R_factor_gt            0.0473 
_refine_ls_wR_factor_ref          0.0992 
_refine_ls_wR_factor_gt           0.0938 
_refine_ls_goodness_of_fit_ref    1.202 
_refine_ls_restrained_S_all       1.202 
_refine_ls_shift/su_max           0.001 
_refine_ls_shift/su_mean          0.000 
 
loop_ 
 _atom_site_label 
 _atom_site_type_symbol 
 _atom_site_fract_x 
 _atom_site_fract_y 
 _atom_site_fract_z 
 _atom_site_U_iso_or_equiv 
 _atom_site_adp_type 
 _atom_site_occupancy 
 _atom_site_symmetry_multiplicity 
 _atom_site_calc_flag 
 _atom_site_refinement_flags 
 _atom_site_disorder_assembly 
 _atom_site_disorder_group 
C1 C 0.7863(5) 0.3718(5) 0.1443(4) 0.0298(12) Uani 1 1 d . . . 
H1 H 0.7479 0.3050 0.0991 0.036 Uiso 1 1 calc R . . 
C2 C 0.8274(6) 0.4845(5) 0.1170(4) 0.0311(12) Uani 1 1 d . . . 
H2 H 0.8112 0.4918 0.0539 0.037 Uiso 1 1 calc R . . 
C11 C 0.7787(5) 0.2397(4) 0.2505(4) 0.0254(11) Uani 1 1 d . . . 
C12 C 0.6699(5) 0.1700(5) 0.2861(4) 0.0292(12) Uani 1 1 d . . . 
C13 C 0.6502(6) 0.0562(5) 0.3019(4) 0.0368(14) Uani 1 1 d . . . 
H13 H 0.5769 0.0083 0.3260 0.044 Uiso 1 1 calc R . . 
C14 C 0.7354(6) 0.0118(5) 0.2831(4) 0.0384(14) Uani 1 1 d . . . 
H14 H 0.7181 -0.0672 0.2916 0.046 Uiso 1 1 calc R . . 
C15 C 0.8454(6) 0.0820(5) 0.2520(4) 0.0340(13) Uani 1 1 d . . . 
H15 H 0.9054 0.0519 0.2417 0.041 Uiso 1 1 calc R . . 
C16 C 0.8701(5) 0.1967(5) 0.2353(4) 0.0287(11) Uani 1 1 d . . . 
C21 C 0.9389(5) 0.6935(4) 0.1457(4) 0.0275(11) Uani 1 1 d . . . 
C22 C 0.8520(6) 0.7404(5) 0.1041(4) 0.0331(13) Uani 1 1 d . . . 
C23 C 0.9064(7) 0.8565(5) 0.0859(4) 0.0416(15) Uani 1 1 d . . . 
H23 H 0.8500 0.8897 0.0594 0.050 Uiso 1 1 calc R . . 
C24 C 1.0412(7) 0.9238(5) 0.1058(5) 0.0481(17) Uani 1 1 d . . . 
H24 H 1.0769 1.0031 0.0931 0.058 Uiso 1 1 calc R . . 
C25 C 1.1247(7) 0.8772(5) 0.1440(5) 0.0417(14) Uani 1 1 d . . . 
H25 H 1.2175 0.9243 0.1561 0.050 Uiso 1 1 calc R . . 
C26 C 1.0758(6) 0.7629(5) 0.1653(4) 0.0317(12) Uani 1 1 d . . . 
C101 C 0.5587(7) 0.5205(7) 0.3094(7) 0.0654(9) Uani 1 1 d . . . 
H10A H 0.5324 0.4474 0.3387 0.078 Uiso 1 1 calc R . . 
H10B H 0.5519 0.4998 0.2441 0.078 Uiso 1 1 calc R . . 
C102 C 0.4716(7) 0.5770(7) 0.3197(7) 0.0654(9) Uani 1 1 d . . . 
H10C H 0.3908 0.5216 0.3377 0.078 Uiso 1 1 calc R . . 
H10D H 0.4459 0.6055 0.2623 0.078 Uiso 1 1 calc R . . 
C103 C 0.5580(7) 0.6811(7) 0.3957(6) 0.0654(9) Uani 1 1 d . . . 
H10E H 0.5743 0.7572 0.3724 0.078 Uiso 1 1 calc R . . 
H10F H 0.5142 0.6752 0.4472 0.078 Uiso 1 1 calc R . . 
C104 C 0.6805(7) 0.6722(8) 0.4243(7) 0.0654(9) Uani 1 1 d . . . 
H10G H 0.7559 0.7517 0.4373 0.078 Uiso 1 1 calc R . . 
H10H H 0.6800 0.6337 0.4804 0.078 Uiso 1 1 calc R . . 
C121 C 0.5719(5) 0.2165(5) 0.3031(5) 0.0364(14) Uani 1 1 d . . . 
H121 H 0.6240 0.3030 0.3235 0.044 Uiso 1 1 calc R . . 
C122 C 0.5009(7) 0.1633(6) 0.3770(6) 0.0564(19) Uani 1 1 d . . . 
H12A H 0.4344 0.0823 0.3544 0.085 Uiso 1 1 calc R . . 
H12B H 0.4575 0.2102 0.3946 0.085 Uiso 1 1 calc R . . 
H12C H 0.5648 0.1629 0.4300 0.085 Uiso 1 1 calc R . . 
C123 C 0.4747(6) 0.2023(7) 0.2127(6) 0.056(2) Uani 1 1 d . . . 
H12D H 0.5229 0.2526 0.1712 0.085 Uiso 1 1 calc R . . 
H12E H 0.4071 0.2255 0.2244 0.085 Uiso 1 1 calc R . . 
H12F H 0.4323 0.1199 0.1849 0.085 Uiso 1 1 calc R . . 
C161 C 0.9939(6) 0.2722(5) 0.2032(4) 0.0370(13) Uani 1 1 d . . . 
H161 H 1.0048 0.3551 0.2083 0.044 Uiso 1 1 calc R . . 
C162 C 1.1186(6) 0.2721(6) 0.2617(6) 0.058(2) Uani 1 1 d . . . 
H16A H 1.1237 0.2928 0.3260 0.087 Uiso 1 1 calc R . . 
H16B H 1.1968 0.3298 0.2437 0.087 Uiso 1 1 calc R . . 
H16C H 1.1149 0.1934 0.2529 0.087 Uiso 1 1 calc R . . 
C163 C 0.9818(8) 0.2338(8) 0.1041(5) 0.060(2) Uani 1 1 d . . . 
H16D H 0.9646 0.1508 0.0963 0.089 Uiso 1 1 calc R . . 
H16E H 1.0643 0.2823 0.0860 0.089 Uiso 1 1 calc R . . 
H16F H 0.9087 0.2435 0.0661 0.089 Uiso 1 1 calc R . . 
C201 C 0.9958(6) 0.8827(5) 0.3591(5) 0.0422(15) Uani 1 1 d . . . 
H20A H 0.9259 0.8985 0.3778 0.051 Uiso 1 1 calc R . . 
H20B H 0.9705 0.8591 0.2925 0.051 Uiso 1 1 calc R . . 
C202 C 1.1277(7) 0.9908(6) 0.3854(5) 0.0500(17) Uani 1 1 d . . . 
H20C H 1.1781 1.0003 0.3374 0.060 Uiso 1 1 calc R . . 
H20D H 1.1153 1.0628 0.3957 0.060 Uiso 1 1 calc R . . 
C203 C 1.1979(7) 0.9681(7) 0.4722(6) 0.062(2) Uani 1 1 d . . . 
H20E H 1.2833 0.9709 0.4653 0.074 Uiso 1 1 calc R . . 
H20F H 1.2151 1.0278 0.5233 0.074 Uiso 1 1 calc R . . 
C204 C 1.1092(8) 0.8504(6) 0.4887(5) 0.059(2) Uani 1 1 d . . . 
H20G H 1.1599 0.8051 0.5078 0.070 Uiso 1 1 calc R . . 
H20H H 1.0649 0.8565 0.5376 0.070 Uiso 1 1 calc R . . 
C221 C 0.7033(6) 0.6699(6) 0.0826(5) 0.0417(15) Uani 1 1 d . . . 
H221 H 0.6830 0.5913 0.1039 0.050 Uiso 1 1 calc R . . 
C222 C 0.6378(9) 0.7280(8) 0.1330(7) 0.074(3) Uani 1 1 d . . . 
H22A H 0.6751 0.7393 0.1986 0.110 Uiso 1 1 calc R . . 
H22B H 0.5425 0.6773 0.1207 0.110 Uiso 1 1 calc R . . 
H22C H 0.6539 0.8045 0.1123 0.110 Uiso 1 1 calc R . . 
C223 C 0.6470(8) 0.6488(9) -0.0202(6) 0.075(3) Uani 1 1 d . . . 
H22D H 0.5505 0.6063 -0.0325 0.113 Uiso 1 1 calc R . . 
H22E H 0.6818 0.6019 -0.0497 0.113 Uiso 1 1 calc R . . 
H22F H 0.6727 0.7247 -0.0441 0.113 Uiso 1 1 calc R . . 
C261 C 1.1670(6) 0.7077(5) 0.2044(4) 0.0360(13) Uani 1 1 d . . . 
H261 H 1.1224 0.6520 0.2462 0.043 Uiso 1 1 calc R . . 
C262 C 1.3008(6) 0.7970(6) 0.2601(5) 0.0532(18) Uani 1 1 d . . . 
H26A H 1.3525 0.8463 0.2197 0.080 Uiso 1 1 calc R . . 
H26B H 1.3480 0.7554 0.2917 0.080 Uiso 1 1 calc R . . 
H26C H 1.2880 0.8468 0.3049 0.080 Uiso 1 1 calc R . . 
C263 C 1.1819(7) 0.6347(6) 0.1280(5) 0.0509(17) Uani 1 1 d . . . 
H26D H 1.0946 0.5736 0.0969 0.076 Uiso 1 1 calc R . . 
H26E H 1.2379 0.5977 0.1539 0.076 Uiso 1 1 calc R . . 
H26F H 1.2226 0.6862 0.0845 0.076 Uiso 1 1 calc R . . 
N1 N 0.7996(4) 0.3554(4) 0.2324(3) 0.0256(9) Uani 1 1 d . . . 
N2 N 0.8879(4) 0.5804(4) 0.1762(3) 0.0259(9) Uani 1 1 d . . . 
O1 O 0.6932(5) 0.6041(5) 0.3527(4) 0.0654(9) Uani 1 1 d . . . 
O2 O 1.0135(4) 0.7924(3) 0.4059(3) 0.0418(10) Uani 1 1 d . . . 
Ba Ba 0.90206(3) 0.55327(3) 0.35441(2) 0.02150(9) Uani 1 1 d . . . 
I I 1.19818(3) 0.56066(4) 0.45345(3) 0.03941(12) Uani 1 1 d . . . 
C200 C 0.6052(10) 0.0013(9) 0.0231(7) 0.090(3) Uani 1 1 d . . . 
H200 H 0.6834 -0.0006 0.0558 0.108 Uiso 1 1 calc R . . 
C100 C 0.4876(8) -0.0814(12) 0.0432(8) 0.099(4) Uani 1 1 d . . . 
H100 H 0.4938 -0.1479 0.0669 0.119 Uiso 1 1 calc R . . 
C300 C 0.6251(11) 0.0832(11) -0.0354(10) 0.114(5) Uani 1 1 d . . . 
H300 H 0.6980 0.1266 -0.0614 0.137 Uiso 1 1 calc R . . 
 
loop_ 
 _atom_site_aniso_label 
 _atom_site_aniso_U_11 
 _atom_site_aniso_U_22 
 _atom_site_aniso_U_33 
 _atom_site_aniso_U_23 
 _atom_site_aniso_U_13 
 _atom_site_aniso_U_12 
C1 0.041(3) 0.020(3) 0.023(3) -0.001(2) 0.001(2) 0.012(2) 
C2 0.046(3) 0.032(3) 0.017(3) 0.003(2) 0.001(2) 0.021(3) 
C11 0.031(3) 0.018(2) 0.018(3) -0.001(2) -0.001(2) 0.006(2) 
C12 0.034(3) 0.019(3) 0.024(3) -0.001(2) -0.001(2) 0.006(2) 
C13 0.044(3) 0.022(3) 0.026(3) 0.006(2) -0.001(3) 0.001(2) 
C14 0.055(4) 0.019(3) 0.033(3) 0.003(2) -0.001(3) 0.013(3) 
C15 0.047(3) 0.027(3) 0.028(3) 0.000(2) -0.003(3) 0.021(3) 
C16 0.038(3) 0.024(3) 0.024(3) 0.002(2) 0.005(2) 0.014(2) 
C21 0.045(3) 0.021(3) 0.016(3) 0.003(2) 0.011(2) 0.012(2) 
C22 0.055(3) 0.031(3) 0.020(3) 0.007(2) 0.010(3) 0.024(3) 
C23 0.069(4) 0.032(3) 0.032(3) 0.012(3) 0.013(3) 0.029(3) 
C24 0.087(5) 0.024(3) 0.036(4) 0.013(3) 0.022(4) 0.024(3) 
C25 0.058(4) 0.025(3) 0.035(4) 0.005(3) 0.020(3) 0.008(3) 
C26 0.045(3) 0.029(3) 0.020(3) 0.005(2) 0.013(2) 0.013(3) 
C101 0.0484(16) 0.070(2) 0.081(3) -0.0042(18) 0.0130(16) 0.0306(16) 
C102 0.0484(16) 0.070(2) 0.081(3) -0.0042(18) 0.0130(16) 0.0306(16) 
C103 0.0484(16) 0.070(2) 0.081(3) -0.0042(18) 0.0130(16) 0.0306(16) 
C104 0.0484(16) 0.070(2) 0.081(3) -0.0042(18) 0.0130(16) 0.0306(16) 
C121 0.032(3) 0.026(3) 0.045(4) -0.002(3) 0.006(3) 0.008(2) 
C122 0.048(4) 0.042(4) 0.067(5) -0.002(4) 0.025(4) 0.004(3) 
C123 0.037(3) 0.058(4) 0.068(6) -0.005(4) -0.003(3) 0.022(3) 
C161 0.043(3) 0.031(3) 0.039(4) 0.002(3) 0.012(3) 0.017(3) 
C162 0.044(4) 0.051(4) 0.078(6) 0.002(4) 0.009(4) 0.023(3) 
C163 0.067(5) 0.077(5) 0.043(5) 0.012(4) 0.026(4) 0.034(4) 
C201 0.050(4) 0.040(3) 0.041(4) 0.007(3) 0.004(3) 0.025(3) 
C202 0.060(4) 0.033(3) 0.049(5) 0.008(3) 0.008(3) 0.015(3) 
C203 0.057(4) 0.049(4) 0.048(5) 0.013(4) -0.001(4) 0.000(4) 
C204 0.074(5) 0.038(4) 0.046(5) 0.000(3) -0.015(4) 0.020(4) 
C221 0.055(4) 0.049(4) 0.034(4) 0.015(3) 0.010(3) 0.033(3) 
C222 0.080(6) 0.064(5) 0.098(8) 0.017(5) 0.034(5) 0.045(5) 
C223 0.062(5) 0.093(7) 0.057(6) 0.018(5) -0.003(4) 0.025(5) 
C261 0.038(3) 0.032(3) 0.033(3) 0.008(3) 0.012(3) 0.008(3) 
C262 0.045(4) 0.050(4) 0.048(5) 0.003(3) 0.005(3) 0.007(3) 
C263 0.053(4) 0.050(4) 0.052(5) -0.005(3) 0.008(3) 0.026(3) 
N1 0.028(2) 0.018(2) 0.028(3) 0.0032(18) 0.0065(19) 0.0079(18) 
N2 0.034(2) 0.023(2) 0.021(2) 0.0081(18) 0.0058(19) 0.0130(19) 
O1 0.0484(16) 0.070(2) 0.081(3) -0.0042(18) 0.0130(16) 0.0306(16) 
O2 0.050(2) 0.023(2) 0.042(3) -0.0005(18) -0.005(2) 0.0124(19) 
Ba 0.02354(15) 0.02274(15) 0.01879(16) 0.00201(11) 0.00427(12) 0.01096(12) 
I 0.02767(19) 0.0648(3) 0.0333(2) 0.0207(2) 0.01279(16) 0.0239(2) 
C200 0.087(6) 0.080(7) 0.070(7) 0.034(6) -0.014(5) 0.018(5) 
C100 0.043(5) 0.149(11) 0.095(9) 0.024(8) 0.014(5) 0.032(6) 
C300 0.091(8) 0.120(10) 0.157(14) 0.070(10) 0.054(8) 0.056(7) 
 
_geom_special_details 
; 
 All esds (except the esd in the dihedral angle between two l.s. planes) 
 are estimated using the full covariance matrix.  The cell esds are taken 
 into account individually in the estimation of esds in distances, angles 
 and torsion angles; correlations between esds in cell parameters are only 
 used when they are defined by crystal symmetry.  An approximate (isotropic) 
 treatment of cell esds is used for estimating esds involving l.s. planes. 
; 
 
loop_ 
 _geom_bond_atom_site_label_1 
 _geom_bond_atom_site_label_2 
 _geom_bond_distance 
 _geom_bond_site_symmetry_2 
 _geom_bond_publ_flag 
C1 N1 1.343(7) . ? 
C1 C2 1.401(7) . ? 
C1 H1 0.9500 . ? 
C2 N2 1.314(7) . ? 
C2 H2 0.9500 . ? 
C11 C12 1.403(8) . ? 
C11 C16 1.420(7) . ? 
C11 N1 1.423(6) . ? 
C12 C13 1.395(7) . ? 
C12 C121 1.529(8) . ? 
C13 C14 1.384(9) . ? 
C13 H13 0.9500 . ? 
C14 C15 1.378(9) . ? 
C14 H14 0.9500 . ? 
C15 C16 1.396(7) . ? 
C15 H15 0.9500 . ? 
C16 C161 1.516(8) . ? 
C21 C26 1.400(8) . ? 
C21 N2 1.425(6) . ? 
C21 C22 1.426(7) . ? 
C22 C23 1.390(8) . ? 
C22 C221 1.513(9) . ? 
C23 C24 1.377(10) . ? 
C23 H23 0.9500 . ? 
C24 C25 1.376(9) . ? 
C24 H24 0.9500 . ? 
C25 C26 1.384(8) . ? 
C25 H25 0.9500 . ? 
C26 C261 1.532(8) . ? 
C101 O1 1.453(9) . ? 
C101 C102 1.481(9) . ? 
C101 H10A 0.9900 . ? 
C101 H10B 0.9900 . ? 
C102 C103 1.547(12) . ? 
C102 H10C 0.9900 . ? 
C102 H10D 0.9900 . ? 
C103 C104 1.444(9) . ? 
C103 H10E 0.9900 . ? 
C103 H10F 0.9900 . ? 
C104 O1 1.426(10) . ? 
C104 H10G 0.9900 . ? 
C104 H10H 0.9900 . ? 
C121 C122 1.512(10) . ? 
C121 C123 1.543(9) . ? 
C121 H121 1.0000 . ? 
C122 H12A 0.9800 . ? 
C122 H12B 0.9800 . ? 
C122 H12C 0.9800 . ? 
C123 H12D 0.9800 . ? 
C123 H12E 0.9800 . ? 
C123 H12F 0.9800 . ? 
C161 C163 1.518(10) . ? 
C161 C162 1.535(8) . ? 
C161 H161 1.0000 . ? 
C162 H16A 0.9800 . ? 
C162 H16B 0.9800 . ? 
C162 H16C 0.9800 . ? 
C163 H16D 0.9800 . ? 
C163 H16E 0.9800 . ? 
C163 H16F 0.9800 . ? 
C201 O2 1.430(7) . ? 
C201 C202 1.514(9) . ? 
C201 H20A 0.9900 . ? 
C201 H20B 0.9900 . ? 
C202 C203 1.508(10) . ? 
C202 H20C 0.9900 . ? 
C202 H20D 0.9900 . ? 
C203 C204 1.465(10) . ? 
C203 H20E 0.9900 . ? 
C203 H20F 0.9900 . ? 
C204 O2 1.429(8) . ? 
C204 H20G 0.9900 . ? 
C204 H20H 0.9900 . ? 
C221 C222 1.526(10) . ? 
C221 C223 1.530(11) . ? 
C221 H221 1.0000 . ? 
C222 H22A 0.9800 . ? 
C222 H22B 0.9800 . ? 
C222 H22C 0.9800 . ? 
C223 H22D 0.9800 . ? 
C223 H22E 0.9800 . ? 
C223 H22F 0.9800 . ? 
C261 C262 1.521(9) . ? 
C261 C263 1.531(9) . ? 
C261 H261 1.0000 . ? 
C262 H26A 0.9800 . ? 
C262 H26B 0.9800 . ? 
C262 H26C 0.9800 . ? 
C263 H26D 0.9800 . ? 
C263 H26E 0.9800 . ? 
C263 H26F 0.9800 . ? 
N1 Ba 2.720(4) . ? 
N2 Ba 2.706(4) . ? 
O1 Ba 2.730(4) . ? 
O2 Ba 2.748(4) . ? 
Ba I 3.4069(5) . ? 
Ba I 3.4537(6) 2_766 ? 
I Ba 3.4538(6) 2_766 ? 
C200 C300 1.356(13) . ? 
C200 C100 1.407(13) . ? 
C200 C100 1.937(13) 2_655 ? 
C200 H200 0.9500 . ? 
C100 C300 1.268(12) 2_655 ? 
C100 C200 1.937(13) 2_655 ? 
C100 H100 0.9500 . ? 
C300 C100 1.268(12) 2_655 ? 
C300 H300 0.9500 . ? 
 
loop_ 
 _geom_angle_atom_site_label_1 
 _geom_angle_atom_site_label_2 
 _geom_angle_atom_site_label_3 
 _geom_angle 
 _geom_angle_site_symmetry_1 
 _geom_angle_site_symmetry_3 
 _geom_angle_publ_flag 
N1 C1 C2 121.9(5) . . ? 
N1 C1 H1 119.0 . . ? 
C2 C1 H1 119.0 . . ? 
N2 C2 C1 121.9(5) . . ? 
N2 C2 H2 119.1 . . ? 
C1 C2 H2 119.1 . . ? 
C12 C11 C16 120.3(4) . . ? 
C12 C11 N1 119.8(4) . . ? 
C16 C11 N1 119.9(5) . . ? 
C13 C12 C11 118.8(5) . . ? 
C13 C12 C121 120.9(5) . . ? 
C11 C12 C121 120.3(4) . . ? 
C14 C13 C12 121.2(6) . . ? 
C14 C13 H13 119.4 . . ? 
C12 C13 H13 119.4 . . ? 
C15 C14 C13 120.0(5) . . ? 
C15 C14 H14 120.0 . . ? 
C13 C14 H14 120.0 . . ? 
C14 C15 C16 121.1(5) . . ? 
C14 C15 H15 119.5 . . ? 
C16 C15 H15 119.5 . . ? 
C15 C16 C11 118.5(5) . . ? 
C15 C16 C161 119.4(5) . . ? 
C11 C16 C161 122.0(4) . . ? 
C26 C21 N2 118.9(4) . . ? 
C26 C21 C22 120.2(5) . . ? 
N2 C21 C22 120.6(5) . . ? 
C23 C22 C21 118.5(6) . . ? 
C23 C22 C221 119.1(5) . . ? 
C21 C22 C221 122.4(5) . . ? 
C24 C23 C22 120.7(5) . . ? 
C24 C23 H23 119.6 . . ? 
C22 C23 H23 119.6 . . ? 
C25 C24 C23 120.5(6) . . ? 
C25 C24 H24 119.7 . . ? 
C23 C24 H24 119.7 . . ? 
C24 C25 C26 121.2(6) . . ? 
C24 C25 H25 119.4 . . ? 
C26 C25 H25 119.4 . . ? 
C25 C26 C21 118.9(5) . . ? 
C25 C26 C261 122.0(5) . . ? 
C21 C26 C261 119.0(5) . . ? 
O1 C101 C102 107.6(6) . . ? 
O1 C101 H10A 110.2 . . ? 
C102 C101 H10A 110.2 . . ? 
O1 C101 H10B 110.2 . . ? 
C102 C101 H10B 110.2 . . ? 
H10A C101 H10B 108.5 . . ? 
C101 C102 C103 103.6(6) . . ? 
C101 C102 H10C 111.0 . . ? 
C103 C102 H10C 111.0 . . ? 
C101 C102 H10D 111.0 . . ? 
C103 C102 H10D 111.0 . . ? 
H10C C102 H10D 109.0 . . ? 
C104 C103 C102 105.6(6) . . ? 
C104 C103 H10E 110.6 . . ? 
C102 C103 H10E 110.6 . . ? 
C104 C103 H10F 110.6 . . ? 
C102 C103 H10F 110.6 . . ? 
H10E C103 H10F 108.7 . . ? 
O1 C104 C103 108.1(7) . . ? 
O1 C104 H10G 110.1 . . ? 
C103 C104 H10G 110.1 . . ? 
O1 C104 H10H 110.1 . . ? 
C103 C104 H10H 110.1 . . ? 
H10G C104 H10H 108.4 . . ? 
C122 C121 C12 114.2(5) . . ? 
C122 C121 C123 112.0(5) . . ? 
C12 C121 C123 109.5(5) . . ? 
C122 C121 H121 106.9 . . ? 
C12 C121 H121 106.9 . . ? 
C123 C121 H121 106.9 . . ? 
C121 C122 H12A 109.5 . . ? 
C121 C122 H12B 109.5 . . ? 
H12A C122 H12B 109.5 . . ? 
C121 C122 H12C 109.5 . . ? 
H12A C122 H12C 109.5 . . ? 
H12B C122 H12C 109.5 . . ? 
C121 C123 H12D 109.5 . . ? 
C121 C123 H12E 109.5 . . ? 
H12D C123 H12E 109.5 . . ? 
C121 C123 H12F 109.5 . . ? 
H12D C123 H12F 109.5 . . ? 
H12E C123 H12F 109.5 . . ? 
C16 C161 C163 111.4(5) . . ? 
C16 C161 C162 112.5(5) . . ? 
C163 C161 C162 109.7(5) . . ? 
C16 C161 H161 107.7 . . ? 
C163 C161 H161 107.7 . . ? 
C162 C161 H161 107.7 . . ? 
C161 C162 H16A 109.5 . . ? 
C161 C162 H16B 109.5 . . ? 
H16A C162 H16B 109.5 . . ? 
C161 C162 H16C 109.5 . . ? 
H16A C162 H16C 109.5 . . ? 
H16B C162 H16C 109.5 . . ? 
C161 C163 H16D 109.5 . . ? 
C161 C163 H16E 109.5 . . ? 
H16D C163 H16E 109.5 . . ? 
C161 C163 H16F 109.5 . . ? 
H16D C163 H16F 109.5 . . ? 
H16E C163 H16F 109.5 . . ? 
O2 C201 C202 105.8(5) . . ? 
O2 C201 H20A 110.6 . . ? 
C202 C201 H20A 110.6 . . ? 
O2 C201 H20B 110.6 . . ? 
C202 C201 H20B 110.6 . . ? 
H20A C201 H20B 108.7 . . ? 
C203 C202 C201 104.6(5) . . ? 
C203 C202 H20C 110.8 . . ? 
C201 C202 H20C 110.8 . . ? 
C203 C202 H20D 110.8 . . ? 
C201 C202 H20D 110.8 . . ? 
H20C C202 H20D 108.9 . . ? 
C204 C203 C202 105.8(6) . . ? 
C204 C203 H20E 110.6 . . ? 
C202 C203 H20E 110.6 . . ? 
C204 C203 H20F 110.6 . . ? 
C202 C203 H20F 110.6 . . ? 
H20E C203 H20F 108.7 . . ? 
O2 C204 C203 107.8(6) . . ? 
O2 C204 H20G 110.1 . . ? 
C203 C204 H20G 110.1 . . ? 
O2 C204 H20H 110.1 . . ? 
C203 C204 H20H 110.1 . . ? 
H20G C204 H20H 108.5 . . ? 
C22 C221 C222 111.8(7) . . ? 
C22 C221 C223 110.7(6) . . ? 
C222 C221 C223 111.5(6) . . ? 
C22 C221 H221 107.5 . . ? 
C222 C221 H221 107.5 . . ? 
C223 C221 H221 107.5 . . ? 
C221 C222 H22A 109.5 . . ? 
C221 C222 H22B 109.5 . . ? 
H22A C222 H22B 109.5 . . ? 
C221 C222 H22C 109.5 . . ? 
H22A C222 H22C 109.5 . . ? 
H22B C222 H22C 109.5 . . ? 
C221 C223 H22D 109.5 . . ? 
C221 C223 H22E 109.5 . . ? 
H22D C223 H22E 109.5 . . ? 
C221 C223 H22F 109.5 . . ? 
H22D C223 H22F 109.5 . . ? 
H22E C223 H22F 109.5 . . ? 
C262 C261 C263 111.4(5) . . ? 
C262 C261 C26 113.5(5) . . ? 
C263 C261 C26 110.0(5) . . ? 
C262 C261 H261 107.2 . . ? 
C263 C261 H261 107.2 . . ? 
C26 C261 H261 107.2 . . ? 
C261 C262 H26A 109.5 . . ? 
C261 C262 H26B 109.5 . . ? 
H26A C262 H26B 109.5 . . ? 
C261 C262 H26C 109.5 . . ? 
H26A C262 H26C 109.5 . . ? 
H26B C262 H26C 109.5 . . ? 
C261 C263 H26D 109.5 . . ? 
C261 C263 H26E 109.5 . . ? 
H26D C263 H26E 109.5 . . ? 
C261 C263 H26F 109.5 . . ? 
H26D C263 H26F 109.5 . . ? 
H26E C263 H26F 109.5 . . ? 
C1 N1 C11 115.6(4) . . ? 
C1 N1 Ba 116.0(3) . . ? 
C11 N1 Ba 127.6(3) . . ? 
C2 N2 C21 120.1(5) . . ? 
C2 N2 Ba 117.4(3) . . ? 
C21 N2 Ba 122.4(3) . . ? 
C104 O1 C101 105.1(5) . . ? 
C104 O1 Ba 125.4(4) . . ? 
C101 O1 Ba 121.9(4) . . ? 
C204 O2 C201 106.4(4) . . ? 
C204 O2 Ba 123.5(3) . . ? 
C201 O2 Ba 130.0(4) . . ? 
N2 Ba  N1 62.29(13) . . ? 
N2 Ba  O1 90.58(16) . . ? 
N1 Ba  O1 103.79(15) . . ? 
N2 Ba  O2 92.29(13) . . ? 
N1 Ba  O2 154.58(13) . . ? 
O1 Ba  O2 75.05(15) . . ? 
N2 Ba  I 110.84(9) . . ? 
N1 Ba  I 100.41(8) . . ? 
O1 Ba  I 153.26(13) . . ? 
O2 Ba  I 87.85(8) . . ? 
N2 Ba  I 158.46(9) . 2_766 ? 
N1 Ba  I 101.84(9) . 2_766 ? 
O1 Ba  I 78.77(13) . 2_766 ? 
O2 Ba  I 102.77(10) . 2_766 ? 
I Ba  I 85.336(13) . 2_766 ? 
Ba  I Ba 94.664(13) . 2_766 ? 
C300 C200 C100 130.5(10) . . ? 
C300 C200 C100 40.7(6) . 2_655 ? 
C100 C200 C100 91.2(9) . 2_655 ? 
C300 C200 H200 114.7 . . ? 
C100 C200 H200 114.7 . . ? 
C100 C200 H200 151.9 2_655 . ? 
C300 C100 C200 131.6(12) 2_655 . ? 
C300 C100 C200 44.2(7) 2_655 2_655 ? 
C200 C100 C200 88.8(9) . 2_655 ? 
C300 C100 H100 114.2 2_655 . ? 
C200 C100 H100 114.2 . . ? 
C200 C100 H100 154.1 2_655 . ? 
C100 C300 C200 95.1(10) 2_655 . ? 
C100 C300 H300 132.5 2_655 . ? 
C200 C300 H300 132.5 . . ? 
 
_diffrn_measured_fraction_theta_max    0.999 
_diffrn_reflns_theta_full              25.68 
_diffrn_measured_fraction_theta_full   0.999 
_refine_diff_density_max    1.583 
_refine_diff_density_min   -1.880 
_refine_diff_density_rms    0.131 

data_complex-4
 
_audit_creation_method            SHELXL-97
_chemical_name_systematic
;
 ?
;
_chemical_name_common             complex-4
_chemical_melting_point           ?
_chemical_formula_moiety          'C83 H135 N4 O8 Sr2'
_chemical_formula_sum
 'C83 H135 N4 O8 Sr2'
_chemical_formula_weight          1492.20
 
loop_
 _atom_type_symbol
 _atom_type_description
 _atom_type_scat_dispersion_real
 _atom_type_scat_dispersion_imag
 _atom_type_scat_source
 'Sr'  'Sr'  -1.5310   3.2500
 'International Tables Vol C Tables 4.2.6.8 and 6.1.1.4'
 'I'  'I'  -0.4740   1.8120
 'International Tables Vol C Tables 4.2.6.8 and 6.1.1.4'
 'K'  'K'   0.2010   0.2490
 'International Tables Vol C Tables 4.2.6.8 and 6.1.1.4'
 'O'  'O'   0.0110   0.0060
 'International Tables Vol C Tables 4.2.6.8 and 6.1.1.4'
 'N'  'N'   0.0060   0.0030
 'International Tables Vol C Tables 4.2.6.8 and 6.1.1.4'
 'C'  'C'   0.0030   0.0020
 'International Tables Vol C Tables 4.2.6.8 and 6.1.1.4'
 'H'  'H'   0.0000   0.0000
 'International Tables Vol C Tables 4.2.6.8 and 6.1.1.4'
 
_symmetry_cell_setting            Monoclinic
_symmetry_space_group_name_H-M    P21/c
 
loop_
 _symmetry_equiv_pos_as_xyz
 'x, y, z'
 '-x, y+1/2, -z+1/2'
 '-x, -y, -z'
 'x, -y-1/2, z-1/2'
 
_cell_length_a                    13.662(5)
_cell_length_b                    17.422(5)
_cell_length_c                    19.213(4)
_cell_angle_alpha                 90
_cell_angle_beta                  115.621(17)
_cell_angle_gamma                 90
_cell_volume                      4123(2)
_cell_formula_units_Z             2
_cell_measurement_temperature     100
_cell_measurement_reflns_used     ?
_cell_measurement_theta_min       ?
_cell_measurement_theta_max       ?
 
_exptl_crystal_description        Block
_exptl_crystal_colour             Red
_exptl_crystal_size_max           0.2
_exptl_crystal_size_mid           0.18
_exptl_crystal_size_min           0.15
_exptl_crystal_density_meas       ?
_exptl_crystal_density_diffrn     1.202
_exptl_crystal_density_method     'not measured'
_exptl_crystal_F_000              1602
_exptl_absorpt_coefficient_mu     1.347
_exptl_absorpt_correction_type    Empirical
_exptl_absorpt_correction_T_min   0.766
_exptl_absorpt_correction_T_max   0.827
_exptl_absorpt_process_details    ?
 
_exptl_special_details
;
 ?
;
 
_diffrn_ambient_temperature      100(2)
_diffrn_radiation_probe          x-ray
_diffrn_radiation_type           MoK\a
_diffrn_radiation_wavelength     0.71073
_diffrn_source                   'fine-focus sealed tube'
_diffrn_radiation_monochromator  graphite
_diffrn_measurement_device_type  ?
_diffrn_measurement_method       /w-scans
_diffrn_detector_area_resol_mean  ?
_diffrn_standards_number          ?
_diffrn_standards_interval_count  ?
_diffrn_standards_interval_time   ?
_diffrn_standards_decay_%         ?
_diffrn_reflns_number             77264
_diffrn_reflns_av_R_equivalents   0.1363
_diffrn_reflns_av_sigmaI/netI     0.1163
_diffrn_reflns_limit_h_min        -19
_diffrn_reflns_limit_h_max        19
_diffrn_reflns_limit_k_min        -23
_diffrn_reflns_limit_k_max        24
_diffrn_reflns_limit_l_min        -27
_diffrn_reflns_limit_l_max        27
_diffrn_reflns_theta_min          3.12
_diffrn_reflns_theta_max          30.51
_reflns_number_total              12526
_reflns_number_gt                 5937
_reflns_threshold_expression      >2sigma(I)
 
_computing_data_collection       'RAPID-AUTO (Rigaku, 1998)'
_computing_cell_refinement       'RAPID-AUTO (Rigaku, 1998'
_computing_data_reduction        'teXan (Rigaku/MSC, 2004))'
_computing_structure_solution    'SIR-97'
_computing_structure_refinement  'SHELXL-97 (Sheldrick, 1997)'
_computing_molecular_graphics    'ORTEP32'
_computing_publication_material  ?
 
_refine_special_details
;
 Refinement of F^2^ against ALL reflections.  The weighted R-factor wR and
 goodness of fit S are based on F^2^, conventional R-factors R are based
 on F, with F set to zero for negative F^2^. The threshold expression of
 F^2^ > 2sigma(F^2^) is used only for calculating R-factors(gt) etc. and is
 not relevant to the choice of reflections for refinement.  R-factors based
 on F^2^ are statistically about twice as large as those based on F, and R-
 factors based on ALL data will be even larger.
;
 
_refine_ls_structure_factor_coef  Fsqd
_refine_ls_matrix_type            full
_refine_ls_weighting_scheme       calc
_refine_ls_weighting_details
 'calc w=1/[\s^2^(Fo^2^)+(0.1298P)^2^+3.4207P] where P=(Fo^2^+2Fc^2^)/3'
_atom_sites_solution_primary      direct
_atom_sites_solution_secondary    difmap
_atom_sites_solution_hydrogens    geom
_refine_ls_hydrogen_treatment     constr
_refine_ls_extinction_method      none
_refine_ls_extinction_coef        ?
_refine_ls_number_reflns          12526
_refine_ls_number_parameters      622
_refine_ls_number_restraints      3
_refine_ls_R_factor_all           0.2126
_refine_ls_R_factor_gt            0.0956
_refine_ls_wR_factor_ref          0.2494
_refine_ls_wR_factor_gt           0.2312
_refine_ls_goodness_of_fit_ref    1.035
_refine_ls_restrained_S_all       1.035
_refine_ls_shift/su_max           0.006
_refine_ls_shift/su_mean          0.000
 
loop_
 _atom_site_label
 _atom_site_type_symbol
 _atom_site_fract_x
 _atom_site_fract_y
 _atom_site_fract_z
 _atom_site_U_iso_or_equiv
 _atom_site_adp_type
 _atom_site_occupancy
 _atom_site_symmetry_multiplicity
 _atom_site_calc_flag
 _atom_site_refinement_flags
 _atom_site_disorder_assembly
 _atom_site_disorder_group
Sr1 Sr 0.22420(4) 0.74303(3) 0.73731(3) 0.0425(2) Uani 1 1 d . . .
O1 O 0.1910(6) 0.8284(3) 0.8349(3) 0.106(2) Uani 1 1 d . . .
O3 O 0.4129(4) 0.7151(3) 0.8493(2) 0.0706(13) Uani 1 1 d . E .
O4 O 0.3062(3) 0.87619(19) 0.7286(2) 0.0508(10) Uani 1 1 d . . .
N1 N 0.2477(3) 0.6335(2) 0.6638(2) 0.0362(9) Uani 1 1 d . A .
N2 N 0.1264(5) 0.6352(3) 0.7608(3) 0.0598(14) Uani 1 1 d . . .
C1 C 0.1388(4) 0.6110(3) 0.6402(3) 0.0410(12) Uani 1 1 d . . .
H1 H 0.1025 0.5918 0.5903 0.049 Uiso 1 1 calc R A .
C2 C 0.0825(5) 0.6144(3) 0.6825(4) 0.0506(15) Uani 1 1 d . A .
H2 H 0.0091 0.6021 0.6583 0.061 Uiso 1 1 calc R . .
C3 C 0.3058(4) 0.5961(3) 0.6313(3) 0.0406(12) Uani 1 1 d . . .
C5 C 0.4447(10) 0.6051(5) 0.5847(8) 0.154(4) Uani 1 1 d . . .
H5 H 0.4999 0.6326 0.5799 0.185 Uiso 1 1 calc R A .
C6 C 0.4179(10) 0.5340(5) 0.5512(8) 0.154(4) Uani 1 1 d . A .
H6 H 0.4510 0.5153 0.5212 0.185 Uiso 1 1 calc R . .
C7 C 0.3425(8) 0.4909(4) 0.5620(6) 0.097(3) Uani 1 1 d . . .
H7 H 0.3265 0.4419 0.5408 0.116 Uiso 1 1 calc R A .
C8 C 0.2886(5) 0.5185(3) 0.6042(3) 0.0467(13) Uani 1 1 d . A .
C9 C 0.2221(4) 0.4610(2) 0.6243(3) 0.0352(10) Uani 1 1 d . . .
H9 H 0.1887 0.4879 0.6534 0.042 Uiso 1 1 calc R A .
C10 C 0.2926(5) 0.3965(3) 0.6750(4) 0.0622(17) Uani 1 1 d . A .
H10A H 0.3278 0.3702 0.6481 0.093 Uiso 1 1 calc R . .
H10B H 0.2479 0.3610 0.6865 0.093 Uiso 1 1 calc R . .
H10C H 0.3464 0.4177 0.7221 0.093 Uiso 1 1 calc R . .
C11 C 0.1312(6) 0.4263(4) 0.5523(5) 0.084(2) Uani 1 1 d . A .
H11A H 0.0870 0.4667 0.5200 0.125 Uiso 1 1 calc R . .
H11B H 0.0873 0.3934 0.5674 0.125 Uiso 1 1 calc R . .
H11C H 0.1621 0.3970 0.5245 0.125 Uiso 1 1 calc R . .
C12 C 0.4230(7) 0.7170(5) 0.6588(6) 0.0352(10) Uani 0.50 1 d P . .
H12 H 0.4035 0.7215 0.7022 0.042 Uiso 0.50 1 calc PR A .
C13 C 0.3558(6) 0.7763(4) 0.5975(4) 0.073(2) Uani 1 1 d . A .
H13A H 0.3722 0.7723 0.5539 0.109 Uiso 1 1 calc R . .
H13B H 0.3733 0.8270 0.6190 0.109 Uiso 1 1 calc R . .
H13C H 0.2799 0.7667 0.5814 0.109 Uiso 1 1 calc R . .
C14 C 0.5450(6) 0.7340(5) 0.6894(8) 0.113(4) Uani 1 1 d . A .
H14A H 0.5855 0.6968 0.7280 0.170 Uiso 1 1 calc R . .
H14B H 0.5599 0.7845 0.7117 0.170 Uiso 1 1 calc R . .
H14C H 0.5656 0.7314 0.6477 0.170 Uiso 1 1 calc R . .
C15A C 0.0922(14) 0.6109(9) 0.8159(11) 0.036(3) Uani 0.50 1 d P A 1
C15B C 0.0457(16) 0.6193(10) 0.7900(11) 0.050(5) Uani 0.50 1 d P A 2
C16A C 0.1630(17) 0.5725(7) 0.8871(8) 0.038(3) Uani 0.50 1 d P A 1
C16B C 0.1011(14) 0.5844(9) 0.8620(11) 0.042(3) Uani 0.50 1 d P A 2
C17A C 0.1200(12) 0.5444(6) 0.9370(7) 0.049(3) Uani 0.50 1 d P A 1
H17A H 0.1664 0.5214 0.9833 0.058 Uiso 0.50 1 calc PR A 1
C17B C 0.0441(18) 0.5708(10) 0.9070(11) 0.054(5) Uani 0.50 1 d P A 2
H17B H 0.0822 0.5499 0.9559 0.065 Uiso 0.50 1 calc PR A 2
C18A C 0.0136(18) 0.5500(8) 0.9196(12) 0.055(4) Uani 0.50 1 d P A 1
H18A H -0.0143 0.5270 0.9510 0.066 Uiso 0.50 1 calc PR A 1
C18B C -0.0575(16) 0.5856(12) 0.8844(10) 0.051(5) Uani 0.50 1 d P A 2
H18B H -0.0928 0.5723 0.9146 0.062 Uiso 0.50 1 calc PR A 2
C19A C -0.0557(14) 0.5916(10) 0.8525(10) 0.044(4) Uani 0.50 1 d P A 1
H19A H -0.1281 0.5983 0.8425 0.053 Uiso 0.50 1 calc PR A 1
C19B C -0.1145(11) 0.6231(8) 0.8117(8) 0.052(3) Uani 0.50 1 d P A 2
H19B H -0.1873 0.6356 0.7953 0.063 Uiso 0.50 1 calc PR A 2
C20A C -0.0190(13) 0.6227(7) 0.8015(9) 0.040(3) Uani 0.50 1 d P A 1
C20B C -0.0634(14) 0.6413(8) 0.7645(10) 0.038(3) Uani 0.50 1 d P A 2
C21A C 0.2832(12) 0.5598(9) 0.9066(9) 0.053(4) Uani 0.50 1 d P A 1
H21A H 0.3082 0.6066 0.8910 0.063 Uiso 0.50 1 calc PR A 1
C21B C 0.2222(17) 0.5595(7) 0.8895(8) 0.044(3) Uani 0.50 1 d P A 2
H21B H 0.2601 0.6017 0.8778 0.053 Uiso 0.50 1 calc PR A 2
C22A C 0.2933(11) 0.4950(8) 0.8565(9) 0.058(4) Uani 0.50 1 d P A 1
H22A H 0.3671 0.4916 0.8634 0.086 Uiso 0.50 1 calc PR A 1
H22B H 0.2466 0.5053 0.8033 0.086 Uiso 0.50 1 calc PR A 1
H22C H 0.2725 0.4473 0.8714 0.086 Uiso 0.50 1 calc PR A 1
C22B C 0.2261(13) 0.4885(8) 0.8411(9) 0.057(3) Uani 0.50 1 d P A 2
H22D H 0.3000 0.4723 0.8580 0.085 Uiso 0.50 1 calc PR A 2
H22E H 0.1962 0.5022 0.7875 0.085 Uiso 0.50 1 calc PR A 2
H22F H 0.1845 0.4473 0.8481 0.085 Uiso 0.50 1 calc PR A 2
C23A C 0.3580(13) 0.5473(9) 0.9906(8) 0.065(4) Uani 0.50 1 d P A 1
H23A H 0.3365 0.5018 1.0085 0.097 Uiso 0.50 1 calc PR A 1
H23B H 0.3541 0.5906 1.0201 0.097 Uiso 0.50 1 calc PR A 1
H23C H 0.4311 0.5414 0.9966 0.097 Uiso 0.50 1 calc PR A 1
C23B C 0.2844(14) 0.5418(9) 0.9762(8) 0.068(4) Uani 0.50 1 d P A 2
H23D H 0.2386 0.5129 0.9930 0.101 Uiso 0.50 1 calc PR A 2
H23E H 0.3051 0.5890 1.0047 0.101 Uiso 0.50 1 calc PR A 2
H23F H 0.3482 0.5124 0.9852 0.101 Uiso 0.50 1 calc PR A 2
C24A C -0.0930(11) 0.6730(8) 0.7364(10) 0.035(3) Uani 0.50 1 d P A 1
H24A H -0.0497 0.6962 0.7125 0.041 Uiso 0.50 1 calc PR A 1
C24B C -0.1249(11) 0.6872(7) 0.6906(9) 0.045(3) Uani 0.50 1 d P A 2
H24B H -0.0734 0.7012 0.6697 0.054 Uiso 0.50 1 calc PR A 2
C25A C -0.1871(11) 0.6288(8) 0.6732(8) 0.048(3) Uani 0.50 1 d P A 1
H25A H -0.1584 0.5878 0.6542 0.073 Uiso 0.50 1 calc PR A 1
H25B H -0.2280 0.6631 0.6316 0.073 Uiso 0.50 1 calc PR A 1
H25C H -0.2335 0.6081 0.6943 0.073 Uiso 0.50 1 calc PR A 1
C25B C -0.2171(12) 0.6408(8) 0.6288(9) 0.055(4) Uani 0.50 1 d P A 2
H25D H -0.2657 0.6230 0.6494 0.082 Uiso 0.50 1 calc PR A 2
H25E H -0.1872 0.5976 0.6136 0.082 Uiso 0.50 1 calc PR A 2
H25F H -0.2561 0.6728 0.5847 0.082 Uiso 0.50 1 calc PR A 2
C26A C -0.1381(10) 0.7390(7) 0.7684(8) 0.050(3) Uani 0.50 1 d P A 1
H26A H -0.1826 0.7180 0.7909 0.075 Uiso 0.50 1 calc PR A 1
H26B H -0.1807 0.7731 0.7270 0.075 Uiso 0.50 1 calc PR A 1
H26C H -0.0787 0.7669 0.8069 0.075 Uiso 0.50 1 calc PR A 1
C26B C -0.1686(9) 0.7620(6) 0.7097(8) 0.049(3) Uani 0.50 1 d P A 2
H26D H -0.2237 0.7499 0.7263 0.074 Uiso 0.50 1 calc PR A 2
H26E H -0.1989 0.7938 0.6645 0.074 Uiso 0.50 1 calc PR A 2
H26F H -0.1103 0.7889 0.7501 0.074 Uiso 0.50 1 calc PR A 2
C27 C 0.1782(7) 0.7938(4) 0.8967(4) 0.080(2) Uani 1 1 d . B .
H27A H 0.2489 0.7804 0.9371 0.096 Uiso 1 1 calc R . .
H27B H 0.1364 0.7469 0.8791 0.096 Uiso 1 1 calc R . .
C28 C 0.1235(5) 0.8452(3) 0.9273(3) 0.116(4) Uani 1 1 d . . .
H28A H 0.1748 0.8656 0.9767 0.139 Uiso 0.50 1 calc PR B 1
H28B H 0.0672 0.8179 0.9351 0.139 Uiso 0.50 1 calc PR B 1
H28C H 0.1572 0.8466 0.9833 0.139 Uiso 0.50 1 d PR B 2
H28D H 0.0474 0.8320 0.9087 0.139 Uiso 0.50 1 d PR B 2
C29A C 0.0720(5) 0.9127(3) 0.8679(3) 0.059(4) Uani 0.50 1 d PR B 1
H29A H -0.0031 0.9026 0.8329 0.070 Uiso 0.50 1 d PR B 1
H29B H 0.0771 0.9615 0.8937 0.070 Uiso 0.50 1 d PR B 1
C30A C 0.1427(5) 0.9099(3) 0.8288(3) 0.053(3) Uani 0.50 1 d PR B 1
H30A H 0.2010 0.9468 0.8521 0.063 Uiso 0.50 1 calc PR B 1
H30B H 0.1016 0.9235 0.7749 0.063 Uiso 0.50 1 calc PR B 1
C31A C -0.0174(5) 0.8539(3) 0.6562(3) 0.049(3) Uani 0.50 1 d PR B 2
H31A H -0.0052 0.9089 0.6605 0.058 Uiso 0.50 1 calc PR B 2
H31B H -0.0217 0.8357 0.7026 0.058 Uiso 0.50 1 calc PR B 2
C32B C -0.1162(10) 0.8450(8) 0.5343(8) 0.054(3) Uani 0.50 1 d P C 1
H32A H -0.1821 0.8384 0.5412 0.065 Uiso 0.50 1 calc PR C 1
H32B H -0.1265 0.8872 0.4989 0.065 Uiso 0.50 1 calc PR C 1
C33B C -0.0886(13) 0.7724(10) 0.5044(9) 0.056(4) Uani 0.50 1 d PD C 1
H33A H -0.1108 0.7274 0.5237 0.067 Uiso 0.50 1 calc PR C 1
H33B H -0.1225 0.7713 0.4484 0.067 Uiso 0.50 1 calc PR C 1
C35 C 0.4694(7) 0.7495(4) 0.9233(4) 0.080(2) Uani 1 1 d . . .
H35A H 0.4445 0.7265 0.9588 0.095 Uiso 0.50 1 calc PR D 1
H35B H 0.4518 0.8037 0.9194 0.095 Uiso 0.50 1 calc PR D 1
H35C H 0.4207 0.7597 0.9469 0.095 Uiso 0.50 1 d PR D 2
H35D H 0.5035 0.7971 0.9195 0.095 Uiso 0.50 1 d PR D 2
C36A C 0.593(3) 0.7405(13) 0.9566(18) 0.124(10) Uani 0.50 1 d P E 1
H36A H 0.6240 0.7219 1.0094 0.149 Uiso 0.50 1 calc PR E 1
H36B H 0.6283 0.7883 0.9545 0.149 Uiso 0.50 1 calc PR E 1
C27A C 0.6025(18) 0.6807(12) 0.9015(11) 0.118(7) Uani 0.50 1 d P E 1
H27C H 0.6512 0.6396 0.9301 0.142 Uiso 0.50 1 calc PR E 1
H27D H 0.6294 0.7039 0.8673 0.142 Uiso 0.50 1 calc PR E 1
C38 C 0.4737(4) 0.6467(3) 0.8505(3) 0.119(4) Uani 1 1 d . . .
H38A H 0.4609 0.6307 0.7989 0.142 Uiso 0.50 1 calc PR E 1
H38B H 0.4576 0.6045 0.8769 0.142 Uiso 0.50 1 calc PR E 1
H38C H 0.4237 0.6045 0.8275 0.142 Uiso 0.50 1 d PR E 2
H38D H 0.5132 0.6553 0.8196 0.142 Uiso 0.50 1 d PR E 2
C39 C 0.2523(4) 0.9369(3) 0.6731(3) 0.0527(14) Uani 1 1 d R F .
H39A H 0.1889 0.9552 0.6785 0.063 Uiso 1 1 d R . .
H39B H 0.2299 0.9187 0.6207 0.063 Uiso 1 1 d R . .
C40 C 0.3368(5) 1.0003(3) 0.6922(4) 0.071(2) Uani 1 1 d . . .
H40A H 0.3240 1.0296 0.6462 0.085 Uiso 0.50 1 calc PR F 1
H40B H 0.3324 1.0348 0.7303 0.085 Uiso 0.50 1 calc PR F 1
H40C H 0.3028 1.0504 0.6792 0.085 Uiso 0.50 1 d PR F 2
H40D H 0.3819 0.9927 0.6652 0.085 Uiso 0.50 1 d PR F 2
C41A C 0.4356(5) 0.9672(3) 0.7201(4) 0.051(3) Uani 0.50 1 d PR F 1
H41A H 0.4915 1.0018 0.7541 0.061 Uiso 0.50 1 d PR F 1
H41B H 0.4536 0.9508 0.6788 0.061 Uiso 0.50 1 d PR F 1
C41B C 0.4039(10) 0.9913(7) 0.7813(7) 0.057(3) Uani 0.50 1 d P F 2
H41C H 0.4788 1.0060 0.7966 0.069 Uiso 0.50 1 calc PR F 2
H41D H 0.3740 1.0238 0.8084 0.069 Uiso 0.50 1 calc PR F 2
C42A C 0.4206(9) 0.8989(7) 0.7642(8) 0.049(3) Uani 0.50 1 d P F 1
H42A H 0.4655 0.8564 0.7627 0.059 Uiso 0.50 1 calc PR F 1
H42B H 0.4424 0.9127 0.8178 0.059 Uiso 0.50 1 calc PR F 1
C42B C 0.3975(10) 0.9086(7) 0.8005(7) 0.047(3) Uani 0.50 1 d P F 2
H42C H 0.3812 0.9038 0.8447 0.056 Uiso 0.50 1 calc PR F 2
H42D H 0.4653 0.8823 0.8116 0.056 Uiso 0.50 1 calc PR F 2
C31B C -0.0194(9) 0.8601(7) 0.6115(7) 0.044(3) Uani 0.50 1 d P C 1
H31C H 0.0036 0.9132 0.6152 0.053 Uiso 0.50 1 calc PR C 1
H31D H -0.0377 0.8490 0.6540 0.053 Uiso 0.50 1 calc PR C 1
C32A C -0.1227(9) 0.8343(8) 0.5837(9) 0.063(4) Uani 0.50 1 d P B 2
H32C H -0.1773 0.8139 0.5982 0.076 Uiso 0.50 1 calc PR B 2
H32D H -0.1516 0.8796 0.5520 0.076 Uiso 0.50 1 calc PR B 2
C33A C -0.0901(14) 0.7759(11) 0.5417(10) 0.059(4) Uani 0.50 1 d P B 2
H33C H -0.1328 0.7806 0.4864 0.071 Uiso 0.50 1 calc PR B 2
H33D H -0.0985 0.7244 0.5576 0.071 Uiso 0.50 1 calc PR B 2
C34A C 0.0312(14) 0.7770(11) 0.5355(10) 0.066(5) Uani 0.50 1 d PD C 1
H34A H 0.0626 0.7265 0.5379 0.079 Uiso 0.50 1 calc PR C 1
H34B H 0.0526 0.8102 0.5040 0.079 Uiso 0.50 1 calc PR C 1
O2B O 0.0651(14) 0.8090(10) 0.6130(8) 0.049(4) Uani 0.50 1 d PD C 1
O2A O 0.0679(13) 0.8153(10) 0.6456(7) 0.045(3) Uani 0.50 1 d PD B 2
C34B C 0.0300(13) 0.7943(10) 0.5647(10) 0.044(4) Uani 0.50 1 d PD B 2
H34C H 0.0685 0.7499 0.5587 0.053 Uiso 0.50 1 calc PR B 2
H34D H 0.0378 0.8366 0.5346 0.053 Uiso 0.50 1 calc PR B 2
C36B C 0.556(2) 0.6945(12) 0.9672(17) 0.124(10) Uani 0.50 1 d P E 2
H36C H 0.6260 0.7181 0.9812 0.149 Uiso 0.50 1 calc PR E 2
H36D H 0.5504 0.6803 1.0142 0.149 Uiso 0.50 1 calc PR E 2
C37B C 0.5458(19) 0.6284(12) 0.9222(10) 0.118(7) Uani 0.50 1 d P E 2
H37A H 0.6152 0.6151 0.9230 0.142 Uiso 0.50 1 calc PR E 2
H37B H 0.5202 0.5853 0.9417 0.142 Uiso 0.50 1 calc PR E 2
C30B C 0.2164(15) 0.9109(8) 0.8550(11) 0.077(5) Uani 0.50 1 d P B 2
H30C H 0.1984 0.9428 0.8097 0.092 Uiso 0.50 1 calc PR B 2
H30D H 0.2917 0.9188 0.8911 0.092 Uiso 0.50 1 calc PR B 2
C29B C 0.1399(14) 0.9233(8) 0.8918(9) 0.070(5) Uani 0.50 1 d P B 2
H29C H 0.0705 0.9417 0.8534 0.084 Uiso 0.50 1 calc PR B 2
H29D H 0.1696 0.9618 0.9320 0.084 Uiso 0.50 1 calc PR B 2
C4 C 0.3927(5) 0.6377(3) 0.6256(4) 0.0627(18) Uani 1 1 d . A .
 
loop_
 _atom_site_aniso_label
 _atom_site_aniso_U_11
 _atom_site_aniso_U_22
 _atom_site_aniso_U_33
 _atom_site_aniso_U_23
 _atom_site_aniso_U_13
 _atom_site_aniso_U_12
Sr1 0.0456(3) 0.0339(3) 0.0493(3) -0.0008(2) 0.0216(2) 0.0005(2)
O1 0.217(7) 0.047(3) 0.109(4) -0.014(3) 0.122(5) -0.003(3)
O3 0.075(3) 0.075(3) 0.044(2) 0.003(2) 0.009(2) 0.038(3)
O4 0.034(2) 0.0352(18) 0.067(3) -0.0028(18) 0.0065(19) -0.0053(15)
N1 0.029(2) 0.035(2) 0.040(2) -0.0002(18) 0.0112(18) 0.0005(17)
N2 0.075(4) 0.036(2) 0.090(4) 0.000(3) 0.056(3) -0.006(2)
C1 0.034(3) 0.033(2) 0.053(3) 0.002(2) 0.016(2) 0.002(2)
C2 0.042(3) 0.035(3) 0.081(4) 0.001(3) 0.032(3) 0.001(2)
C3 0.035(3) 0.037(3) 0.047(3) -0.004(2) 0.014(2) 0.002(2)
C5 0.212(9) 0.057(3) 0.317(12) -0.042(5) 0.231(9) -0.028(4)
C6 0.212(9) 0.057(3) 0.317(12) -0.042(5) 0.231(9) -0.028(4)
C7 0.151(8) 0.045(4) 0.156(8) -0.031(5) 0.124(8) -0.021(4)
C8 0.046(3) 0.036(3) 0.056(3) -0.002(2) 0.020(3) 0.002(2)
C9 0.022(2) 0.0274(19) 0.053(3) -0.0043(19) 0.0131(19) -0.0017(16)
C10 0.056(4) 0.052(3) 0.072(4) 0.014(3) 0.021(3) 0.012(3)
C11 0.057(4) 0.051(4) 0.102(6) -0.006(4) -0.004(4) -0.018(3)
C12 0.022(2) 0.0274(19) 0.053(3) -0.0043(19) 0.0131(19) -0.0017(16)
C13 0.087(6) 0.049(3) 0.087(5) -0.014(4) 0.042(4) -0.010(4)
C14 0.045(4) 0.075(5) 0.217(12) -0.025(6) 0.054(6) -0.019(4)
C15A 0.029(8) 0.038(7) 0.042(10) -0.009(7) 0.016(7) -0.008(7)
C15B 0.037(10) 0.041(7) 0.053(11) -0.006(7) 0.003(8) -0.002(8)
C16A 0.038(8) 0.030(6) 0.036(8) -0.002(5) 0.007(8) -0.005(7)
C16B 0.045(9) 0.040(7) 0.037(9) -0.016(6) 0.014(7) -0.008(7)
C17A 0.062(8) 0.032(5) 0.045(7) -0.001(5) 0.017(6) 0.001(6)
C17B 0.074(15) 0.039(9) 0.047(9) -0.003(7) 0.024(9) -0.017(8)
C18A 0.069(13) 0.029(8) 0.064(11) 0.006(7) 0.025(9) 0.007(8)
C18B 0.062(10) 0.053(9) 0.045(11) -0.017(9) 0.030(9) -0.036(8)
C19A 0.046(8) 0.042(7) 0.044(10) 0.009(8) 0.020(8) 0.003(6)
C19B 0.045(7) 0.059(7) 0.053(7) -0.012(6) 0.022(6) -0.014(6)
C20A 0.032(8) 0.036(6) 0.046(8) 0.003(6) 0.011(7) 0.005(5)
C20B 0.042(9) 0.029(7) 0.033(8) 0.001(6) 0.008(7) 0.000(6)
C21A 0.033(7) 0.054(7) 0.061(10) 0.009(6) 0.011(7) 0.018(7)
C21B 0.053(10) 0.040(7) 0.032(7) 0.008(5) 0.011(9) 0.015(9)
C22A 0.046(8) 0.055(8) 0.063(9) -0.003(6) 0.015(8) 0.006(7)
C22B 0.064(9) 0.051(7) 0.056(9) -0.002(6) 0.027(8) 0.002(8)
C23A 0.063(9) 0.066(9) 0.057(9) -0.007(7) 0.019(8) 0.002(8)
C23B 0.076(11) 0.066(9) 0.044(8) 0.005(7) 0.010(8) -0.010(9)
C24A 0.024(7) 0.039(8) 0.039(8) -0.006(7) 0.013(6) -0.001(5)
C24B 0.039(7) 0.040(6) 0.051(8) -0.009(7) 0.014(6) -0.003(5)
C25A 0.037(8) 0.051(7) 0.058(9) -0.007(7) 0.020(7) -0.010(6)
C25B 0.046(8) 0.048(7) 0.063(9) -0.005(8) 0.017(8) -0.001(6)
C26A 0.035(6) 0.056(7) 0.059(8) 0.005(6) 0.021(6) 0.015(5)
C26B 0.033(6) 0.042(6) 0.071(9) -0.005(6) 0.021(6) -0.003(5)
C27 0.123(7) 0.054(4) 0.074(5) 0.005(4) 0.054(5) 0.012(4)
C28 0.208(11) 0.075(5) 0.106(7) 0.036(5) 0.107(8) 0.070(6)
C29A 0.067(10) 0.051(8) 0.048(8) 0.002(6) 0.016(8) 0.016(7)
C30A 0.064(9) 0.040(6) 0.060(8) -0.013(6) 0.032(8) 0.002(7)
C31A 0.029(6) 0.044(6) 0.052(8) -0.007(6) -0.001(6) -0.002(5)
C32B 0.040(7) 0.061(8) 0.052(8) 0.012(7) 0.011(6) -0.001(6)
C33B 0.054(9) 0.051(8) 0.043(9) -0.002(8) 0.002(8) -0.002(6)
C35 0.075(5) 0.092(6) 0.049(4) 0.003(4) 0.005(4) 0.025(4)
C36A 0.118(19) 0.111(17) 0.087(10) -0.020(16) -0.008(11) 0.058(16)
C27A 0.131(16) 0.117(14) 0.066(9) 0.009(9) 0.005(8) 0.083(12)
C38 0.161(10) 0.114(7) 0.066(5) 0.015(5) 0.035(6) 0.095(7)
C39 0.044(3) 0.048(3) 0.063(4) 0.003(3) 0.020(3) -0.006(3)
C40 0.076(5) 0.068(4) 0.063(4) 0.000(3) 0.024(4) -0.033(4)
C41A 0.031(6) 0.037(5) 0.079(8) 0.003(6) 0.020(6) -0.007(5)
C41B 0.053(7) 0.052(7) 0.065(8) -0.020(6) 0.024(6) -0.017(6)
C42A 0.027(6) 0.052(7) 0.050(8) 0.005(6) 0.000(5) -0.011(5)
C42B 0.042(7) 0.050(6) 0.042(7) -0.010(6) 0.013(6) -0.002(5)
C31B 0.033(6) 0.040(6) 0.049(7) 0.001(6) 0.007(6) 0.006(4)
C32A 0.025(6) 0.053(7) 0.082(10) -0.007(8) -0.004(7) 0.003(5)
C33A 0.054(9) 0.057(9) 0.050(10) -0.007(9) 0.007(8) 0.009(6)
C34A 0.093(13) 0.048(9) 0.055(13) 0.000(8) 0.031(11) 0.022(8)
O2B 0.043(6) 0.049(7) 0.047(10) 0.000(9) 0.010(8) 0.009(5)
O2A 0.032(5) 0.035(5) 0.051(8) 0.000(7) 0.002(7) 0.008(3)
C34B 0.046(8) 0.040(9) 0.037(11) -0.002(8) 0.009(7) -0.001(6)
C36B 0.118(19) 0.111(17) 0.087(10) -0.020(16) -0.008(11) 0.058(16)
C37B 0.131(16) 0.117(14) 0.066(9) 0.009(9) 0.005(8) 0.083(12)
C30B 0.110(14) 0.039(7) 0.116(15) -0.012(8) 0.082(13) -0.003(8)
C29B 0.102(14) 0.054(8) 0.050(9) 0.004(7) 0.028(9) 0.019(9)
C4 0.049(4) 0.045(3) 0.109(5) -0.012(3) 0.047(4) -0.005(3)
 
_geom_special_details
;
 All esds (except the esd in the dihedral angle between two l.s. planes)
 are estimated using the full covariance matrix.  The cell esds are taken
 into account individually in the estimation of esds in distances, angles
 and torsion angles; correlations between esds in cell parameters are only
 used when they are defined by crystal symmetry.  An approximate (isotropic)
 treatment of cell esds is used for estimating esds involving l.s. planes.
;
 
loop_
 _geom_bond_atom_site_label_1
 _geom_bond_atom_site_label_2
 _geom_bond_distance
 _geom_bond_site_symmetry_2
 _geom_bond_publ_flag
Sr1 O2A 2.448(16) . ?
Sr1 N2 2.458(5) . ?
Sr1 N1 2.475(4) . ?
Sr1 O1 2.582(4) . ?
Sr1 O3 2.592(4) . ?
Sr1 O4 2.613(4) . ?
Sr1 O2B 2.694(16) . ?
O1 C27 1.409(8) . ?
O1 C30B 1.491(14) . ?
O1 C30A 1.550(7) . ?
O3 C35 1.423(8) . ?
O3 C38 1.448(6) . ?
O4 C39 1.455(6) . ?
O4 C42A 1.463(11) . ?
O4 C42B 1.514(12) . ?
N1 C3 1.370(6) . ?
N1 C1 1.410(6) . ?
N2 C15A 1.394(19) . ?
N2 C2 1.405(8) . ?
N2 C15B 1.46(2) . ?
C1 C2 1.340(7) . ?
C1 H1 0.9300 . ?
C2 H2 0.9300 . ?
C3 C8 1.431(7) . ?
C3 C4 1.435(8) . ?
C5 C6 1.372(12) . ?
C5 C4 1.388(10) . ?
C5 H5 0.9300 . ?
C6 C7 1.362(10) . ?
C6 H6 0.9300 . ?
C7 C8 1.395(8) . ?
C7 H7 0.9300 . ?
C8 C9 1.510(7) . ?
C9 C10 1.525(7) . ?
C9 C11 1.528(8) . ?
C9 H9 0.9800 . ?
C10 H10A 0.9600 . ?
C10 H10B 0.9600 . ?
C10 H10C 0.9600 . ?
C11 H11A 0.9600 . ?
C11 H11B 0.9600 . ?
C11 H11C 0.9600 . ?
C12 C4 1.504(10) . ?
C12 C13 1.537(12) . ?
C12 C14 1.538(11) . ?
C12 H12 0.9800 . ?
C13 H13A 0.9600 . ?
C13 H13B 0.9600 . ?
C13 H13C 0.9600 . ?
C14 H14A 0.9600 . ?
C14 H14B 0.9600 . ?
C14 H14C 0.9600 . ?
C15A C20A 1.437(18) . ?
C15A C16A 1.45(2) . ?
C15B C16B 1.40(2) . ?
C15B C20B 1.41(2) . ?
C16A C17A 1.412(19) . ?
C16A C21A 1.53(2) . ?
C16B C17B 1.41(2) . ?
C16B C21B 1.56(2) . ?
C17A C18A 1.35(3) . ?
C17A H17A 0.9300 . ?
C17B C18B 1.29(3) . ?
C17B H17B 0.9300 . ?
C18A C19A 1.42(3) . ?
C18A H18A 0.9300 . ?
C18B C19B 1.43(2) . ?
C18B H18B 0.9300 . ?
C19A C20A 1.39(2) . ?
C19A H19A 0.9300 . ?
C19B C20B 1.399(18) . ?
C19B H19B 0.9300 . ?
C20A C24A 1.503(18) . ?
C20B C24B 1.526(19) . ?
C21A C23A 1.51(2) . ?
C21A C22A 1.53(2) . ?
C21A H21A 0.9800 . ?
C21B C23B 1.539(18) . ?
C21B C22B 1.562(19) . ?
C21B H21B 0.9800 . ?
C22A H22A 0.9600 . ?
C22A H22B 0.9600 . ?
C22A H22C 0.9600 . ?
C22B H22D 0.9600 . ?
C22B H22E 0.9600 . ?
C22B H22F 0.9600 . ?
C23A H23A 0.9600 . ?
C23A H23B 0.9600 . ?
C23A H23C 0.9600 . ?
C23B H23D 0.9600 . ?
C23B H23E 0.9600 . ?
C23B H23F 0.9600 . ?
C24A C25A 1.539(18) . ?
C24A C26A 1.551(16) . ?
C24A H24A 0.9800 . ?
C24B C25B 1.536(19) . ?
C24B C26B 1.542(16) . ?
C24B H24B 0.9800 . ?
C25A H25A 0.9600 . ?
C25A H25B 0.9600 . ?
C25A H25C 0.9600 . ?
C25B H25D 0.9600 . ?
C25B H25E 0.9600 . ?
C25B H25F 0.9600 . ?
C26A H26A 0.9600 . ?
C26A H26B 0.9600 . ?
C26A H26C 0.9600 . ?
C26B H26D 0.9600 . ?
C26B H26E 0.9600 . ?
C26B H26F 0.9600 . ?
C27 C28 1.445(9) . ?
C27 H27A 0.9700 . ?
C27 H27B 0.9700 . ?
C28 C29A 1.5770 . ?
C28 C29B 1.582(17) . ?
C28 H28A 0.9700 . ?
C28 H28B 0.9700 . ?
C28 H28C 0.9700 . ?
C28 H28D 0.9700 . ?
C29A C30A 1.4585 . ?
C29A H29A 0.9700 . ?
C29A H29B 0.9700 . ?
C30A H30A 0.9700 . ?
C30A H30B 0.9700 . ?
C31A O2A 1.435(16) . ?
C31A C32A 1.547(14) . ?
C31A H31A 0.9700 . ?
C31A H31B 0.9700 . ?
C32B C33B 1.50(2) . ?
C32B C31B 1.524(17) . ?
C32B H32A 0.9700 . ?
C32B H32B 0.9700 . ?
C33B C34A 1.483(17) . ?
C33B H33A 0.9700 . ?
C33B H33B 0.9700 . ?
C35 C36B 1.47(3) . ?
C35 C36A 1.54(3) . ?
C35 H35A 0.9700 . ?
C35 H35B 0.9700 . ?
C35 H35C 0.9700 . ?
C35 H35D 0.9700 . ?
C36A C27A 1.53(3) . ?
C36A H35D 1.4944 . ?
C36A H36A 0.9700 . ?
C36A H36B 0.9700 . ?
C27A C38 1.71(2) . ?
C27A H27C 0.9700 . ?
C27A H27D 0.9700 . ?
C38 C37B 1.341(17) . ?
C38 H38A 0.9700 . ?
C38 H38B 0.9700 . ?
C38 H38C 0.9700 . ?
C38 H38D 0.9700 . ?
C39 C40 1.523(7) . ?
C39 H39A 0.9700 . ?
C39 H39B 0.9700 . ?
C40 C41A 1.3465 . ?
C40 C41B 1.562(14) . ?
C40 H40A 0.9700 . ?
C40 H40B 0.9700 . ?
C40 H40C 0.9700 . ?
C40 H40D 0.9700 . ?
C41A C42A 1.526(13) . ?
C41A H40D 1.0859 . ?
C41A H41A 0.9700 . ?
C41A H41B 0.9699 . ?
C41B C42B 1.499(17) . ?
C41B H41C 0.9700 . ?
C41B H41D 0.9700 . ?
C42A H42A 0.9700 . ?
C42A H42B 0.9700 . ?
C42B H42C 0.9700 . ?
C42B H42D 0.9700 . ?
C31B O2B 1.449(19) . ?
C31B H31C 0.9700 . ?
C31B H31D 0.9700 . ?
C32A C33A 1.48(2) . ?
C32A H32C 0.9700 . ?
C32A H32D 0.9700 . ?
C33A C34B 1.54(2) . ?
C33A H33C 0.9700 . ?
C33A H33D 0.9700 . ?
C34A O2B 1.465(13) . ?
C34A H34A 0.9700 . ?
C34A H34B 0.9700 . ?
O2A C34B 1.458(13) . ?
C34B H34C 0.9700 . ?
C34B H34D 0.9700 . ?
C36B C37B 1.41(3) . ?
C36B H36C 0.9700 . ?
C36B H36D 0.9700 . ?
C37B H37A 0.9700 . ?
C37B H37B 0.9700 . ?
C30B C29B 1.51(2) . ?
C30B H30C 0.9700 . ?
C30B H30D 0.9700 . ?
C29B H29B 1.0984 . ?
C29B H29C 0.9700 . ?
C29B H29D 0.9700 . ?
 
loop_
 _geom_angle_atom_site_label_1
 _geom_angle_atom_site_label_2
 _geom_angle_atom_site_label_3
 _geom_angle
 _geom_angle_site_symmetry_1
 _geom_angle_site_symmetry_3
 _geom_angle_publ_flag
O2A Sr1 N2 98.7(4) . . ?
O2A Sr1 N1 105.9(3) . . ?
N2 Sr1 N1 74.36(15) . . ?
O2A Sr1 O1 81.6(3) . . ?
N2 Sr1 O1 91.52(17) . . ?
N1 Sr1 O1 164.73(15) . . ?
O2A Sr1 O3 159.9(4) . . ?
N2 Sr1 O3 97.36(19) . . ?
N1 Sr1 O3 90.08(13) . . ?
O1 Sr1 O3 85.94(19) . . ?
O2A Sr1 O4 76.2(4) . . ?
N2 Sr1 O4 166.60(14) . . ?
N1 Sr1 O4 118.85(13) . . ?
O1 Sr1 O4 75.56(14) . . ?
O3 Sr1 O4 85.41(15) . . ?
O2A Sr1 O2B 12.8(4) . . ?
N2 Sr1 O2B 101.2(4) . . ?
N1 Sr1 O2B 94.4(3) . . ?
O1 Sr1 O2B 94.0(3) . . ?
O3 Sr1 O2B 161.4(4) . . ?
O4 Sr1 O2B 76.6(4) . . ?
C27 O1 C30B 107.1(8) . . ?
C27 O1 C30A 104.6(5) . . ?
C30B O1 C30A 34.8(7) . . ?
C27 O1 Sr1 119.4(4) . . ?
C30B O1 Sr1 130.5(7) . . ?
C30A O1 Sr1 132.6(4) . . ?
C35 O3 C38 105.7(4) . . ?
C35 O3 Sr1 131.7(4) . . ?
C38 O3 Sr1 121.7(3) . . ?
C39 O4 C42A 104.3(6) . . ?
C39 O4 C42B 110.7(6) . . ?
C42A O4 C42B 35.0(6) . . ?
C39 O4 Sr1 126.7(3) . . ?
C42A O4 Sr1 127.6(5) . . ?
C42B O4 Sr1 118.6(5) . . ?
C3 N1 C1 117.3(4) . . ?
C3 N1 Sr1 150.6(3) . . ?
C1 N1 Sr1 91.1(3) . . ?
C15A N2 C2 127.3(8) . . ?
C15A N2 C15B 25.4(6) . . ?
C2 N2 C15B 108.6(8) . . ?
C15A N2 Sr1 139.4(7) . . ?
C2 N2 Sr1 90.8(3) . . ?
C15B N2 Sr1 140.8(7) . . ?
C2 C1 N1 126.5(5) . . ?
C2 C1 H1 116.8 . . ?
N1 C1 H1 116.8 . . ?
C1 C2 N2 124.8(6) . . ?
C1 C2 H2 117.6 . . ?
N2 C2 H2 117.6 . . ?
N1 C3 C8 125.4(5) . . ?
N1 C3 C4 117.1(5) . . ?
C8 C3 C4 117.4(5) . . ?
C6 C5 C4 122.5(7) . . ?
C6 C5 H5 118.8 . . ?
C4 C5 H5 118.8 . . ?
C7 C6 C5 119.4(7) . . ?
C7 C6 H6 120.3 . . ?
C5 C6 H6 120.3 . . ?
C6 C7 C8 121.6(6) . . ?
C6 C7 H7 119.2 . . ?
C8 C7 H7 119.2 . . ?
C7 C8 C3 119.4(5) . . ?
C7 C8 C9 116.5(5) . . ?
C3 C8 C9 123.8(5) . . ?
C8 C9 C10 111.6(4) . . ?
C8 C9 C11 112.0(5) . . ?
C10 C9 C11 109.1(5) . . ?
C8 C9 H9 108.0 . . ?
C10 C9 H9 108.0 . . ?
C11 C9 H9 108.0 . . ?
C9 C10 H10A 109.5 . . ?
C9 C10 H10B 109.5 . . ?
H10A C10 H10B 109.5 . . ?
C9 C10 H10C 109.5 . . ?
H10A C10 H10C 109.5 . . ?
H10B C10 H10C 109.5 . . ?
C9 C11 H11A 109.5 . . ?
C9 C11 H11B 109.5 . . ?
H11A C11 H11B 109.5 . . ?
C9 C11 H11C 109.5 . . ?
H11A C11 H11C 109.5 . . ?
H11B C11 H11C 109.5 . . ?
C4 C12 C13 109.2(8) . . ?
C4 C12 C14 113.1(7) . . ?
C13 C12 C14 110.7(8) . . ?
C4 C12 H12 107.9 . . ?
C13 C12 H12 107.9 . . ?
C14 C12 H12 107.9 . . ?
C12 C13 H13A 109.5 . . ?
C12 C13 H13B 109.5 . . ?
H13A C13 H13B 109.5 . . ?
C12 C13 H13C 109.5 . . ?
H13A C13 H13C 109.5 . . ?
H13B C13 H13C 109.5 . . ?
C12 C14 H14A 109.5 . . ?
C12 C14 H14B 109.5 . . ?
H14A C14 H14B 109.5 . . ?
C12 C14 H14C 109.5 . . ?
H14A C14 H14C 109.5 . . ?
H14B C14 H14C 109.5 . . ?
N2 C15A C20A 118.9(15) . . ?
N2 C15A C16A 123.3(12) . . ?
C20A C15A C16A 117.8(16) . . ?
C16B C15B C20B 120.1(18) . . ?
C16B C15B N2 106.7(14) . . ?
C20B C15B N2 132.5(15) . . ?
C17A C16A C15A 119.8(17) . . ?
C17A C16A C21A 120.0(15) . . ?
C15A C16A C21A 120.2(14) . . ?
C15B C16B C17B 118.3(17) . . ?
C15B C16B C21B 119.7(15) . . ?
C17B C16B C21B 122.0(18) . . ?
C18A C17A C16A 121.9(16) . . ?
C18A C17A H17A 119.1 . . ?
C16A C17A H17A 119.1 . . ?
C18B C17B C16B 124(2) . . ?
C18B C17B H17B 118.0 . . ?
C16B C17B H17B 118.0 . . ?
C17A C18A C19A 119.0(17) . . ?
C17A C18A H18A 120.5 . . ?
C19A C18A H18A 120.5 . . ?
C17B C18B C19B 118.3(16) . . ?
C17B C18B H18B 120.9 . . ?
C19B C18B H18B 120.9 . . ?
C20A C19A C18A 122.4(17) . . ?
C20A C19A H19A 118.8 . . ?
C18A C19A H19A 118.8 . . ?
C20B C19B C18B 121.5(14) . . ?
C20B C19B H19B 119.2 . . ?
C18B C19B H19B 119.2 . . ?
C19A C20A C15A 118.8(15) . . ?
C19A C20A C24A 119.7(15) . . ?
C15A C20A C24A 121.3(14) . . ?
C19B C20B C15B 117.6(17) . . ?
C19B C20B C24B 119.6(15) . . ?
C15B C20B C24B 122.8(14) . . ?
C23A C21A C22A 111.3(12) . . ?
C23A C21A C16A 116.2(14) . . ?
C22A C21A C16A 109.3(12) . . ?
C23A C21A H21A 106.5 . . ?
C22A C21A H21A 106.5 . . ?
C16A C21A H21A 106.5 . . ?
C23B C21B C22B 109.9(12) . . ?
C23B C21B C16B 115.4(15) . . ?
C22B C21B C16B 108.8(13) . . ?
C23B C21B H21B 107.5 . . ?
C22B C21B H21B 107.5 . . ?
C16B C21B H21B 107.5 . . ?
C21B C22B H22D 109.5 . . ?
C21B C22B H22E 109.5 . . ?
H22D C22B H22E 109.5 . . ?
C21B C22B H22F 109.5 . . ?
H22D C22B H22F 109.5 . . ?
H22E C22B H22F 109.5 . . ?
C21B C23B H23D 109.5 . . ?
C21B C23B H23E 109.5 . . ?
H23D C23B H23E 109.5 . . ?
C21B C23B H23F 109.5 . . ?
H23D C23B H23F 109.5 . . ?
H23E C23B H23F 109.5 . . ?
C20A C24A C25A 113.4(12) . . ?
C20A C24A C26A 110.0(13) . . ?
C25A C24A C26A 110.2(11) . . ?
C20A C24A H24A 107.7 . . ?
C25A C24A H24A 107.7 . . ?
C26A C24A H24A 107.7 . . ?
C20B C24B C25B 112.4(11) . . ?
C20B C24B C26B 109.6(11) . . ?
C25B C24B C26B 110.9(11) . . ?
C20B C24B H24B 107.9 . . ?
C25B C24B H24B 107.9 . . ?
C26B C24B H24B 107.9 . . ?
C24B C25B H25D 109.5 . . ?
C24B C25B H25E 109.5 . . ?
H25D C25B H25E 109.5 . . ?
C24B C25B H25F 109.5 . . ?
H25D C25B H25F 109.5 . . ?
H25E C25B H25F 109.5 . . ?
C24B C26B H26D 109.5 . . ?
C24B C26B H26E 109.5 . . ?
H26D C26B H26E 109.5 . . ?
C24B C26B H26F 109.5 . . ?
H26D C26B H26F 109.5 . . ?
H26E C26B H26F 109.5 . . ?
O1 C27 C28 110.6(6) . . ?
O1 C27 H27A 109.5 . . ?
C28 C27 H27A 109.5 . . ?
O1 C27 H27B 109.5 . . ?
C28 C27 H27B 109.5 . . ?
H27A C27 H27B 108.1 . . ?
C27 C28 C29A 108.4(4) . . ?
C27 C28 C29B 99.4(7) . . ?
C29A C28 C29B 31.6(6) . . ?
C27 C28 H28A 110.0 . . ?
C29A C28 H28A 110.0 . . ?
C29B C28 H28A 86.0 . . ?
C27 C28 H28B 110.0 . . ?
C29A C28 H28B 110.0 . . ?
C29B C28 H28B 139.4 . . ?
H28A C28 H28B 108.4 . . ?
C27 C28 H28C 112.7 . . ?
C29A C28 H28C 129.3 . . ?
C29B C28 H28C 111.7 . . ?
H28A C28 H28C 27.3 . . ?
H28B C28 H28C 82.5 . . ?
C27 C28 H28D 111.3 . . ?
C29A C28 H28D 80.6 . . ?
C29B C28 H28D 112.0 . . ?
H28A C28 H28D 130.8 . . ?
H28B C28 H28D 31.2 . . ?
H28C C28 H28D 109.5 . . ?
C30A C29A C28 99.2 . . ?
C30A C29A H29A 111.9 . . ?
C28 C29A H29A 111.9 . . ?
C30A C29A H29B 111.9 . . ?
C28 C29A H29B 111.9 . . ?
H29A C29A H29B 109.6 . . ?
C29A C30A O1 110.3(3) . . ?
C29A C30A H30A 109.6 . . ?
O1 C30A H30A 109.6 . . ?
C29A C30A H30B 109.6 . . ?
O1 C30A H30B 109.6 . . ?
H30A C30A H30B 108.1 . . ?
O2A C31A C32A 105.4(9) . . ?
O2A C31A H31A 110.7 . . ?
C32A C31A H31A 110.7 . . ?
O2A C31A H31B 110.7 . . ?
C32A C31A H31B 110.7 . . ?
H31A C31A H31B 108.8 . . ?
C33B C32B C31B 105.2(11) . . ?
C33B C32B H32A 110.7 . . ?
C31B C32B H32A 110.7 . . ?
C33B C32B H32B 110.7 . . ?
C31B C32B H32B 110.7 . . ?
H32A C32B H32B 108.8 . . ?
C34A C33B C32B 102.5(12) . . ?
C34A C33B H33A 111.3 . . ?
C32B C33B H33A 111.3 . . ?
C34A C33B H33B 111.3 . . ?
C32B C33B H33B 111.3 . . ?
H33A C33B H33B 109.2 . . ?
O3 C35 C36B 104.7(12) . . ?
O3 C35 C36A 113.4(13) . . ?
C36B C35 C36A 39.5(15) . . ?
O3 C35 H35A 108.9 . . ?
C36B C35 H35A 76.5 . . ?
C36A C35 H35A 108.9 . . ?
O3 C35 H35B 108.9 . . ?
C36B C35 H35B 142.2 . . ?
C36A C35 H35B 108.9 . . ?
H35A C35 H35B 107.7 . . ?
O3 C35 H35C 110.9 . . ?
C36B C35 H35C 113.2 . . ?
C36A C35 H35C 132.8 . . ?
H35A C35 H35C 39.5 . . ?
H35B C35 H35C 70.0 . . ?
O3 C35 H35D 110.9 . . ?
C36B C35 H35D 108.0 . . ?
C36A C35 H35D 69.0 . . ?
H35A C35 H35D 137.0 . . ?
H35B C35 H35D 43.2 . . ?
H35C C35 H35D 109.0 . . ?
C35 C36A C27A 100.7(19) . . ?
C35 C36A H35D 37.3 . . ?
C27A C36A H35D 114.6 . . ?
C35 C36A H36A 111.6 . . ?
C27A C36A H36A 111.6 . . ?
H35D C36A H36A 127.8 . . ?
C35 C36A H36B 111.6 . . ?
C27A C36A H36B 111.6 . . ?
H35D C36A H36B 74.4 . . ?
H36A C36A H36B 109.4 . . ?
C36A C27A C38 105.2(18) . . ?
C36A C27A H27C 110.7 . . ?
C38 C27A H27C 110.7 . . ?
C36A C27A H27D 110.7 . . ?
C38 C27A H27D 110.7 . . ?
H27C C27A H27D 108.8 . . ?
C37B C38 O3 111.9(9) . . ?
C37B C38 C27A 51.3(12) . . ?
O3 C38 C27A 99.5(7) . . ?
C37B C38 H38A 135.3 . . ?
O3 C38 H38A 111.9 . . ?
C27A C38 H38A 111.9 . . ?
C37B C38 H38B 61.0 . . ?
O3 C38 H38B 111.9 . . ?
C27A C38 H38B 111.9 . . ?
H38A C38 H38B 109.6 . . ?
C37B C38 H38C 110.4 . . ?
O3 C38 H38C 109.3 . . ?
C27A C38 H38C 150.8 . . ?
H38A C38 H38C 62.4 . . ?
H38B C38 H38C 52.5 . . ?
C37B C38 H38D 108.0 . . ?
O3 C38 H38D 109.3 . . ?
C27A C38 H38D 65.8 . . ?
H38A C38 H38D 47.4 . . ?
H38B C38 H38D 138.5 . . ?
H38C C38 H38D 107.9 . . ?
O4 C39 C40 105.0(4) . . ?
O4 C39 H39A 110.7 . . ?
C40 C39 H39A 110.7 . . ?
O4 C39 H39B 110.8 . . ?
C40 C39 H39B 110.7 . . ?
H39A C39 H39B 108.8 . . ?
C41A C40 C39 108.1(3) . . ?
C41A C40 C41B 60.6(5) . . ?
C39 C40 C41B 102.4(6) . . ?
C41A C40 H40A 110.1 . . ?
C39 C40 H40A 110.1 . . ?
C41B C40 H40A 147.3 . . ?
C41A C40 H40B 110.1 . . ?
C39 C40 H40B 110.1 . . ?
C41B C40 H40B 55.5 . . ?
H40A C40 H40B 108.4 . . ?
C41A C40 H40C 140.7 . . ?
C39 C40 H40C 111.2 . . ?
C41B C40 H40C 111.2 . . ?
H40A C40 H40C 54.0 . . ?
H40B C40 H40C 57.1 . . ?
C41A C40 H40D 52.9 . . ?
C39 C40 H40D 111.3 . . ?
C41B C40 H40D 111.4 . . ?
H40A C40 H40D 59.3 . . ?
H40B C40 H40D 138.5 . . ?
H40C C40 H40D 109.2 . . ?
C40 C41A C42A 101.7(5) . . ?
C40 C41A H40D 45.5 . . ?
C42A C41A H40D 131.5 . . ?
C40 C41A H41A 111.4 . . ?
C42A C41A H41A 111.5 . . ?
H40D C41A H41A 113.9 . . ?
C40 C41A H41B 111.4 . . ?
C42A C41A H41B 111.4 . . ?
H40D C41A H41B 68.3 . . ?
H41A C41A H41B 109.3 . . ?
C42B C41B C40 107.2(8) . . ?
C42B C41B H41C 110.3 . . ?
C40 C41B H41C 110.3 . . ?
C42B C41B H41D 110.3 . . ?
C40 C41B H41D 110.3 . . ?
H41C C41B H41D 108.5 . . ?
O4 C42A C41A 108.9(8) . . ?
O4 C42A H42A 109.9 . . ?
C41A C42A H42A 109.9 . . ?
O4 C42A H42B 109.9 . . ?
C41A C42A H42B 109.9 . . ?
H42A C42A H42B 108.3 . . ?
C41B C42B O4 104.3(9) . . ?
C41B C42B H42C 110.9 . . ?
O4 C42B H42C 110.9 . . ?
C41B C42B H42D 110.9 . . ?
O4 C42B H42D 110.9 . . ?
H42C C42B H42D 108.9 . . ?
O2B C31B C32B 105.2(11) . . ?
O2B C31B H31C 110.7 . . ?
C32B C31B H31C 110.7 . . ?
O2B C31B H31D 110.7 . . ?
C32B C31B H31D 110.7 . . ?
H31C C31B H31D 108.8 . . ?
C33A C32A C31A 105.1(10) . . ?
C33A C32A H32C 110.7 . . ?
C31A C32A H32C 110.7 . . ?
C33A C32A H32D 110.7 . . ?
C31A C32A H32D 110.7 . . ?
H32C C32A H32D 108.8 . . ?
C32A C33A C34B 103.6(13) . . ?
C32A C33A H33C 111.0 . . ?
C34B C33A H33C 111.0 . . ?
C32A C33A H33D 111.0 . . ?
C34B C33A H33D 111.0 . . ?
H33C C33A H33D 109.0 . . ?
O2B C34A C33B 103.8(14) . . ?
O2B C34A H34A 111.0 . . ?
C33B C34A H34A 111.0 . . ?
O2B C34A H34B 111.0 . . ?
C33B C34A H34B 111.0 . . ?
H34A C34A H34B 109.0 . . ?
C31B O2B C34A 108.4(12) . . ?
C31B O2B Sr1 127.6(9) . . ?
C34A O2B Sr1 121.2(11) . . ?
C31A O2A C34B 109.5(13) . . ?
C31A O2A Sr1 130.4(8) . . ?
C34B O2A Sr1 115.8(11) . . ?
O2A C34B C33A 101.7(15) . . ?
O2A C34B H34C 111.4 . . ?
C33A C34B H34C 111.4 . . ?
O2A C34B H34D 111.4 . . ?
C33A C34B H34D 111.4 . . ?
H34C C34B H34D 109.3 . . ?
C37B C36B C35 110(2) . . ?
C37B C36B H36C 109.7 . . ?
C35 C36B H36C 109.7 . . ?
C37B C36B H36D 109.7 . . ?
C35 C36B H36D 109.7 . . ?
H36C C36B H36D 108.2 . . ?
C38 C37B C36B 105.6(15) . . ?
C38 C37B H37A 110.6 . . ?
C36B C37B H37A 110.6 . . ?
C38 C37B H37B 110.6 . . ?
C36B C37B H37B 110.6 . . ?
H37A C37B H37B 108.7 . . ?
O1 C30B C29B 97.4(11) . . ?
O1 C30B H30C 112.3 . . ?
C29B C30B H30C 112.3 . . ?
O1 C30B H30D 112.3 . . ?
C29B C30B H30D 112.3 . . ?
H30C C30B H30D 109.9 . . ?
C30B C29B C28 109.6(11) . . ?
C30B C29B H29B 144.2 . . ?
C28 C29B H29B 104.4 . . ?
C30B C29B H29C 109.8 . . ?
C28 C29B H29C 109.8 . . ?
H29B C29B H29C 46.0 . . ?
C30B C29B H29D 109.8 . . ?
C28 C29B H29D 109.8 . . ?
H29B C29B H29D 67.5 . . ?
H29C C29B H29D 108.2 . . ?
C5 C4 C3 118.7(6) . . ?
C5 C4 C12 120.1(7) . . ?
C3 C4 C12 121.1(6) . . ?
 
_diffrn_measured_fraction_theta_max    0.994
_diffrn_reflns_theta_full              30.51
_diffrn_measured_fraction_theta_full   0.994
_refine_diff_density_max    1.819
_refine_diff_density_min   -1.643
_refine_diff_density_rms    0.100

 
data_complex-5 
 
_audit_creation_method            SHELXL-97 
_chemical_name_systematic 
; 
 ? 
; 
_chemical_name_common             complex-5 
_chemical_melting_point           ? 
_chemical_formula_moiety          ? 
_chemical_formula_sum 
 'C50 H84 Ca N2 O6' 
_chemical_formula_weight          849.27 
 
loop_ 
 _atom_type_symbol 
 _atom_type_description 
 _atom_type_scat_dispersion_real 
 _atom_type_scat_dispersion_imag 
 _atom_type_scat_source 
 'C'  'C'   0.0033   0.0016 
 'International Tables Vol C Tables 4.2.6.8 and 6.1.1.4' 
 'H'  'H'   0.0000   0.0000 
 'International Tables Vol C Tables 4.2.6.8 and 6.1.1.4' 
 'N'  'N'   0.0061   0.0033 
 'International Tables Vol C Tables 4.2.6.8 and 6.1.1.4' 
 'O'  'O'   0.0106   0.0060 
 'International Tables Vol C Tables 4.2.6.8 and 6.1.1.4' 
 'Ca'  'Ca'   0.2262   0.3064 
 'International Tables Vol C Tables 4.2.6.8 and 6.1.1.4' 
 
_symmetry_cell_setting            Monoclinic
_symmetry_space_group_name_H-M    P2(1)/n
_symmetry_space_group_name_Hall   '-P 2yn'
 
loop_ 
 _symmetry_equiv_pos_as_xyz 
 'x, y, z' 
 '-x+1/2, y+1/2, -z+1/2' 
 '-x, -y, -z' 
 'x-1/2, -y-1/2, z-1/2' 
 
_cell_length_a                    9.9117(6) 
_cell_length_b                    30.9715(19) 
_cell_length_c                    16.2712(10) 
_cell_angle_alpha                 90.00 
_cell_angle_beta                  99.9010(10) 
_cell_angle_gamma                 90.00 
_cell_volume                      4920.5(5) 
_cell_formula_units_Z             4 
_cell_measurement_temperature     123(2) 
_cell_measurement_reflns_used     9868
_cell_measurement_theta_min       2.34
_cell_measurement_theta_max       24.63
 
_exptl_crystal_description        lath
_exptl_crystal_colour             orange
_exptl_crystal_size_max           0.75 
_exptl_crystal_size_mid           0.20 
_exptl_crystal_size_min           0.05 
_exptl_crystal_density_meas       ? 
_exptl_crystal_density_diffrn     1.146 
_exptl_crystal_density_method     'not measured' 
_exptl_crystal_F_000              1864 
_exptl_absorpt_coefficient_mu     0.175 
_exptl_absorpt_correction_type    numerical
_exptl_absorpt_correction_T_min   0.8800 
_exptl_absorpt_correction_T_max   0.9913 
_exptl_absorpt_process_details    ? 
 
_exptl_special_details 
; 
 ? 
; 
 
_diffrn_ambient_temperature       123(2) 
_diffrn_radiation_wavelength      0.71073 
_diffrn_radiation_type            MoK\a 
_diffrn_radiation_source          'fine-focus sealed tube' 
_diffrn_radiation_monochromator   graphite 
_diffrn_measurement_device_type   'TXS Rotating Anode'
_diffrn_measurement_method        ? 
_diffrn_detector_area_resol_mean  ? 
_diffrn_standards_number          ? 
_diffrn_standards_interval_count  ? 
_diffrn_standards_interval_time   ? 
_diffrn_standards_decay_%         ? 
_diffrn_reflns_number             55303 
_diffrn_reflns_av_R_equivalents   0.0592 
_diffrn_reflns_av_sigmaI/netI     0.0379 
_diffrn_reflns_limit_h_min        -11 
_diffrn_reflns_limit_h_max        11 
_diffrn_reflns_limit_k_min        -36 
_diffrn_reflns_limit_k_max        36 
_diffrn_reflns_limit_l_min        -19 
_diffrn_reflns_limit_l_max        19 
_diffrn_reflns_theta_min          2.19 
_diffrn_reflns_theta_max          25.04 
_reflns_number_total              8703 
_reflns_number_gt                 6786 
_reflns_threshold_expression      >2sigma(I) 
 
_computing_data_collection         
;
Bruker (2008). APEX2, version 2008.5-0, Bruker AXS Inc., Madison,
Wisconsin, USA.
;
_computing_cell_refinement
;
Bruker (2008). SAINT, version 7.56A, Bruker AXS Inc., Madison,
Wisconsin, USA.
;
_computing_data_reduction
;
Bruker (2008). SAINT, version 7.56A, Bruker AXS Inc., Madison,
Wisconsin, USA.
;
_computing_structure_solution
;
Sheldrick, G. M. (2008). Acta Crystallographica, A64, 112-122.
;
_computing_structure_refinement
;
Sheldrick, G. M. (2008). Acta Crystallographica, A64, 112-122.
;
_computing_molecular_graphics
;
Brandenburg, K. (2009). DIAMOND. Version 3.2c. Crystal Impact GbR, Bonn,
Germany.
;
_computing_publication_material
;
Bruker AXS (2008). SHELXTL. Version 2008/1. Bruker AXS Inc., Madison,
Wisconsin, USA.
;
 
_refine_special_details 
; 
 Refinement of F^2^ against ALL reflections.  The weighted R-factor wR and 
 goodness of fit S are based on F^2^, conventional R-factors R are based 
 on F, with F set to zero for negative F^2^. The threshold expression of 
 F^2^ > 2sigma(F^2^) is used only for calculating R-factors(gt) etc. and is 
 not relevant to the choice of reflections for refinement.  R-factors based 
 on F^2^ are statistically about twice as large as those based on F, and R- 
 factors based on ALL data will be even larger. 
; 
 
_refine_ls_structure_factor_coef  Fsqd  
_refine_ls_matrix_type            full 
_refine_ls_weighting_scheme       calc  
_refine_ls_weighting_details 
 'calc w=1/[\s^2^(Fo^2^)+(0.0681P)^2^+6.0304P] where P=(Fo^2^+2Fc^2^)/3' 
_atom_sites_solution_primary      direct 
_atom_sites_solution_secondary    difmap 
_atom_sites_solution_hydrogens    geom 
_refine_ls_hydrogen_treatment     constr 
_refine_ls_extinction_method      none 
_refine_ls_extinction_coef        ? 
_refine_ls_number_reflns          8703 
_refine_ls_number_parameters      536 
_refine_ls_number_restraints      10 
_refine_ls_R_factor_all           0.0811 
_refine_ls_R_factor_gt            0.0622 
_refine_ls_wR_factor_ref          0.1688 
_refine_ls_wR_factor_gt           0.1588 
_refine_ls_goodness_of_fit_ref    1.083 
_refine_ls_restrained_S_all       1.085 
_refine_ls_shift/su_max           0.000 
_refine_ls_shift/su_mean          0.000 
 
loop_ 
 _atom_site_label 
 _atom_site_type_symbol 
 _atom_site_fract_x 
 _atom_site_fract_y 
 _atom_site_fract_z 
 _atom_site_U_iso_or_equiv 
 _atom_site_adp_type 
 _atom_site_occupancy 
 _atom_site_symmetry_multiplicity 
 _atom_site_calc_flag 
 _atom_site_refinement_flags 
 _atom_site_disorder_assembly 
 _atom_site_disorder_group 
Ca1 Ca 0.37220(5) 0.149046(18) 0.25158(3) 0.02418(16) Uani 1 1 d . . . 
O1 O 0.3718(2) 0.19109(7) 0.37541(13) 0.0366(5) Uani 1 1 d . . . 
O2 O 0.5068(2) 0.10218(7) 0.36114(14) 0.0431(6) Uani 1 1 d . . . 
O3 O 0.59358(19) 0.18260(7) 0.24934(13) 0.0347(5) Uani 1 1 d . . . 
O4 O 0.4610(2) 0.09815(7) 0.16338(13) 0.0363(5) Uani 1 1 d . . . 
N1 N 0.2556(2) 0.19987(7) 0.15688(14) 0.0254(5) Uani 1 1 d . . . 
N2 N 0.1500(2) 0.12116(7) 0.22882(14) 0.0257(5) Uani 1 1 d . . . 
C1 C 0.1246(3) 0.19590(9) 0.17674(16) 0.0247(6) Uani 1 1 d . . . 
H1 H 0.0661 0.2204 0.1692 0.030 Uiso 1 1 calc R . . 
C2 C 0.0761(3) 0.15912(9) 0.20622(17) 0.0250(6) Uani 1 1 d . . . 
H2 H -0.0176 0.1591 0.2121 0.030 Uiso 1 1 calc R . . 
C3 C 0.2836(3) 0.23773(9) 0.11698(17) 0.0253(6) Uani 1 1 d . . . 
C4 C 0.3397(3) 0.23368(9) 0.04175(17) 0.0280(6) Uani 1 1 d . . . 
C5 C 0.3760(3) 0.27026(10) 0.00202(18) 0.0327(7) Uani 1 1 d . . . 
H5 H 0.4172 0.2670 -0.0462 0.039 Uiso 1 1 calc R . . 
C6 C 0.3543(3) 0.31159(10) 0.03037(19) 0.0340(7) Uani 1 1 d . . . 
H6 H 0.3769 0.3363 0.0010 0.041 Uiso 1 1 calc R . . 
C7 C 0.2990(3) 0.31579(10) 0.10225(19) 0.0325(7) Uani 1 1 d . . . 
H7 H 0.2824 0.3439 0.1216 0.039 Uiso 1 1 calc R . . 
C8 C 0.2669(3) 0.28016(9) 0.14736(17) 0.0272(6) Uani 1 1 d . . . 
C9 C 0.3490(3) 0.18895(10) 0.00484(18) 0.0322(7) Uani 1 1 d . . . 
H9 H 0.3710 0.1682 0.0523 0.039 Uiso 1 1 calc R . . 
C10 C 0.2092(3) 0.17635(10) -0.0448(2) 0.0388(7) Uani 1 1 d . . . 
H10A H 0.1404 0.1773 -0.0082 0.058 Uiso 1 1 calc R . . 
H10B H 0.2140 0.1471 -0.0670 0.058 Uiso 1 1 calc R . . 
H10C H 0.1837 0.1966 -0.0911 0.058 Uiso 1 1 calc R . . 
C11 C 0.4596(3) 0.18409(11) -0.0495(2) 0.0413(8) Uani 1 1 d . . . 
H11A H 0.5486 0.1926 -0.0174 0.062 Uiso 1 1 calc R . . 
H11B H 0.4375 0.2027 -0.0988 0.062 Uiso 1 1 calc R . . 
H11C H 0.4636 0.1539 -0.0673 0.062 Uiso 1 1 calc R . . 
C12 C 0.2258(3) 0.28819(9) 0.23219(18) 0.0316(6) Uani 1 1 d . . . 
H12 H 0.2240 0.2597 0.2608 0.038 Uiso 1 1 calc R . . 
C13 C 0.3289(4) 0.31692(11) 0.2872(2) 0.0444(8) Uani 1 1 d . . . 
H13A H 0.3053 0.3186 0.3432 0.067 Uiso 1 1 calc R . . 
H13B H 0.3269 0.3459 0.2629 0.067 Uiso 1 1 calc R . . 
H13C H 0.4210 0.3047 0.2909 0.067 Uiso 1 1 calc R . . 
C14 C 0.0833(3) 0.30826(10) 0.2246(2) 0.0407(8) Uani 1 1 d . . . 
H14A H 0.0614 0.3128 0.2805 0.061 Uiso 1 1 calc R . . 
H14B H 0.0155 0.2888 0.1930 0.061 Uiso 1 1 calc R . . 
H14C H 0.0817 0.3360 0.1956 0.061 Uiso 1 1 calc R . . 
C15 C 0.0684(3) 0.08398(9) 0.21831(18) 0.0270(6) Uani 1 1 d . . . 
C16 C -0.0059(3) 0.07170(9) 0.13926(19) 0.0308(6) Uani 1 1 d . . . 
C17 C -0.0900(3) 0.03535(10) 0.1324(2) 0.0388(7) Uani 1 1 d . . . 
H17 H -0.1407 0.0278 0.0794 0.047 Uiso 1 1 calc R . . 
C18 C -0.1012(3) 0.01004(10) 0.2010(2) 0.0442(8) Uani 1 1 d . . . 
H18 H -0.1596 -0.0145 0.1954 0.053 Uiso 1 1 calc R . . 
C19 C -0.0266(3) 0.02094(10) 0.2775(2) 0.0414(8) Uani 1 1 d . . . 
H19 H -0.0331 0.0034 0.3246 0.050 Uiso 1 1 calc R . . 
C20 C 0.0582(3) 0.05716(9) 0.28762(19) 0.0309(6) Uani 1 1 d . . . 
C21 C 0.0074(3) 0.09651(10) 0.06048(19) 0.0363(7) Uani 1 1 d . . . 
H21 H 0.0862 0.1169 0.0744 0.044 Uiso 1 1 calc R . . 
C22 C 0.0384(4) 0.06622(12) -0.0083(2) 0.0516(9) Uani 1 1 d . . . 
H22A H 0.1210 0.0494 0.0126 0.077 Uiso 1 1 calc R . . 
H22B H 0.0531 0.0833 -0.0567 0.077 Uiso 1 1 calc R . . 
H22C H -0.0391 0.0466 -0.0247 0.077 Uiso 1 1 calc R . . 
C23 C -0.1206(4) 0.12315(11) 0.0272(2) 0.0458(8) Uani 1 1 d . . . 
H23A H -0.1405 0.1427 0.0710 0.069 Uiso 1 1 calc R . . 
H23B H -0.1986 0.1037 0.0105 0.069 Uiso 1 1 calc R . . 
H23C H -0.1047 0.1401 -0.0211 0.069 Uiso 1 1 calc R . . 
C24 C 0.1272(3) 0.07096(10) 0.37447(19) 0.0343(7) Uani 1 1 d . . . 
H24 H 0.2089 0.0888 0.3680 0.041 Uiso 1 1 calc R . . 
C25 C 0.1774(5) 0.03376(12) 0.4330(2) 0.0586(10) Uani 1 1 d . . . 
H25A H 0.2346 0.0144 0.4059 0.088 Uiso 1 1 calc R . . 
H25B H 0.0986 0.0177 0.4462 0.088 Uiso 1 1 calc R . . 
H25C H 0.2313 0.0452 0.4846 0.088 Uiso 1 1 calc R . . 
C26 C 0.0306(4) 0.09972(12) 0.4131(2) 0.0470(8) Uani 1 1 d . . . 
H26A H 0.0019 0.1242 0.3759 0.071 Uiso 1 1 calc R . . 
H26B H 0.0777 0.1105 0.4671 0.071 Uiso 1 1 calc R . . 
H26C H -0.0501 0.0830 0.4212 0.071 Uiso 1 1 calc R . . 
C27 C 0.2504(3) 0.19239(12) 0.4124(2) 0.0417(8) Uani 1 1 d . . . 
H27A H 0.2489 0.1680 0.4514 0.050 Uiso 1 1 calc R . . 
H27B H 0.1673 0.1910 0.3689 0.050 Uiso 1 1 calc R . . 
C28 C 0.2573(4) 0.23472(11) 0.4581(2) 0.0441(8) Uani 1 1 d . . . 
H28A H 0.2071 0.2334 0.5056 0.053 Uiso 1 1 calc R . . 
H28B H 0.2197 0.2585 0.4204 0.053 Uiso 1 1 calc R . . 
C29 C 0.4093(4) 0.24005(12) 0.4876(2) 0.0464(8) Uani 1 1 d . . . 
H29A H 0.4336 0.2708 0.4979 0.056 Uiso 1 1 calc R . . 
H29B H 0.4402 0.2234 0.5393 0.056 Uiso 1 1 calc R . . 
C30 C 0.4706(3) 0.22260(11) 0.4167(2) 0.0418(8) Uani 1 1 d . . . 
H30A H 0.4850 0.2460 0.3777 0.050 Uiso 1 1 calc R . . 
H30B H 0.5598 0.2086 0.4375 0.050 Uiso 1 1 calc R . . 
C31 C 0.5881(6) 0.06622(15) 0.3431(3) 0.0831(16) Uani 1 1 d . . . 
H31A H 0.6744 0.0764 0.3268 0.100 Uiso 1 1 calc R . . 
H31B H 0.5374 0.0488 0.2969 0.100 Uiso 1 1 calc R . . 
C32 C 0.6174(6) 0.04013(15) 0.4209(3) 0.0906(17) Uani 1 1 d . . . 
H32A H 0.5439 0.0187 0.4233 0.109 Uiso 1 1 calc R . . 
H32B H 0.7060 0.0248 0.4251 0.109 Uiso 1 1 calc R . . 
C33 C 0.6221(6) 0.07263(16) 0.4868(3) 0.0829(15) Uani 1 1 d . . . 
H33A H 0.7144 0.0857 0.5003 0.099 Uiso 1 1 calc R . . 
H33B H 0.5981 0.0597 0.5380 0.099 Uiso 1 1 calc R . . 
C34 C 0.5174(4) 0.10575(14) 0.4505(2) 0.0590(10) Uani 1 1 d . . . 
H34A H 0.4280 0.0997 0.4675 0.071 Uiso 1 1 calc R . . 
H34B H 0.5475 0.1351 0.4696 0.071 Uiso 1 1 calc R . . 
C35 C 0.6021(3) 0.21569(11) 0.1865(2) 0.0388(7) Uani 1 1 d . . . 
H35A H 0.5494 0.2417 0.1971 0.047 Uiso 1 1 calc R . . 
H35B H 0.5654 0.2047 0.1299 0.047 Uiso 1 1 calc R . . 
C36 C 0.7518(3) 0.22619(10) 0.1942(2) 0.0355(7) Uani 1 1 d . . . 
H36A H 0.7658 0.2567 0.1797 0.043 Uiso 1 1 calc R . . 
H36B H 0.7970 0.2072 0.1581 0.043 Uiso 1 1 calc R . . 
C37 C 0.8048(3) 0.21770(11) 0.2851(2) 0.0388(7) Uani 1 1 d . . . 
H37A H 0.7821 0.2416 0.3207 0.047 Uiso 1 1 calc R . . 
H37B H 0.9050 0.2129 0.2958 0.047 Uiso 1 1 calc R . . 
C38 C 0.7276(3) 0.17712(11) 0.2984(2) 0.0376(7) Uani 1 1 d . . . 
H38A H 0.7735 0.1515 0.2794 0.045 Uiso 1 1 calc R . . 
H38B H 0.7216 0.1735 0.3581 0.045 Uiso 1 1 calc R . . 
C39 C 0.3679(4) 0.06423(14) 0.1292(3) 0.0662(12) Uani 1 1 d . . . 
H39A H 0.2716 0.0742 0.1220 0.079 Uiso 1 1 calc R . . 
H39B H 0.3788 0.0385 0.1658 0.079 Uiso 1 1 calc R . . 
C40 C 0.4089(4) 0.05412(17) 0.0446(3) 0.0739(13) Uani 1 1 d . . . 
H40A H 0.3827 0.0244 0.0261 0.089 Uiso 1 1 calc R . . 
H40B H 0.3672 0.0748 0.0011 0.089 Uiso 1 1 calc R . . 
C41 C 0.5552(4) 0.05905(16) 0.0636(3) 0.0743(14) Uani 1 1 d . . . 
H41A H 0.5928 0.0655 0.0124 0.089 Uiso 1 1 calc R . . 
H41B H 0.5987 0.0323 0.0890 0.089 Uiso 1 1 calc R . . 
C42 C 0.5807(3) 0.09602(11) 0.1240(2) 0.0417(8) Uani 1 1 d . . . 
H42A H 0.6640 0.0908 0.1660 0.050 Uiso 1 1 calc R . . 
H42B H 0.5926 0.1233 0.0944 0.050 Uiso 1 1 calc R . . 
O5 O 0.2482(3) 0.10818(8) 0.61401(16) 0.0586(7) Uani 1 1 d . . . 
C1S C 0.2253(4) 0.15197(12) 0.6333(2) 0.0494(9) Uani 1 1 d . . . 
H1SA H 0.1471 0.1638 0.5937 0.059 Uiso 1 1 calc R . . 
H1SB H 0.3076 0.1695 0.6299 0.059 Uiso 1 1 calc R . . 
C2S C 0.1951(5) 0.15272(14) 0.7194(3) 0.0703(12) Uani 1 1 d . . . 
H2SA H 0.2788 0.1591 0.7603 0.084 Uiso 1 1 calc R . . 
H2SB H 0.1247 0.1747 0.7249 0.084 Uiso 1 1 calc R . . 
C3S C 0.1440(6) 0.10882(16) 0.7326(4) 0.0912(17) Uani 1 1 d . . . 
H3SA H 0.0470 0.1098 0.7401 0.109 Uiso 1 1 calc R . . 
H3SB H 0.1990 0.0953 0.7826 0.109 Uiso 1 1 calc R . . 
C4S C 0.1586(6) 0.08376(16) 0.6547(3) 0.0816(15) Uani 1 1 d . . . 
H4SA H 0.1973 0.0547 0.6695 0.098 Uiso 1 1 calc R . . 
H4SB H 0.0685 0.0803 0.6182 0.098 Uiso 1 1 calc R . . 
O6 O 0.6674(5) 0.04339(18) 0.8700(3) 0.0708(18) Uiso 0.579(8) 1 d PD A 1 
C5S C 0.7657(8) 0.0423(3) 0.8164(5) 0.064(2) Uiso 0.579(8) 1 d PD A 1 
H5S1 H 0.8163 0.0146 0.8232 0.077 Uiso 0.579(8) 1 calc PR A 1 
H5S2 H 0.8323 0.0661 0.8306 0.077 Uiso 0.579(8) 1 calc PR A 1 
C6S C 0.6955(12) 0.0469(5) 0.7298(7) 0.083(4) Uiso 0.579(8) 1 d PD A 1 
H6S1 H 0.7022 0.0199 0.6982 0.100 Uiso 0.579(8) 1 calc PR A 1 
H6S2 H 0.7362 0.0708 0.7017 0.100 Uiso 0.579(8) 1 calc PR A 1 
C7S C 0.5430(10) 0.0571(3) 0.7354(6) 0.077(3) Uiso 0.579(8) 1 d PD A 1 
H7S1 H 0.5071 0.0817 0.6995 0.092 Uiso 0.579(8) 1 calc PR A 1 
H7S2 H 0.4831 0.0316 0.7213 0.092 Uiso 0.579(8) 1 calc PR A 1 
C8S C 0.5606(10) 0.0684(3) 0.8280(6) 0.075(3) Uiso 0.579(8) 1 d PD A 1 
H8S1 H 0.5822 0.0995 0.8363 0.091 Uiso 0.579(8) 1 calc PR A 1 
H8S2 H 0.4750 0.0622 0.8494 0.091 Uiso 0.579(8) 1 calc PR A 1 
O6A O 0.6096(8) 0.0271(2) 0.7025(5) 0.073(3) Uiso 0.421(8) 1 d PD A 2 
C5SA C 0.6786(11) 0.0657(4) 0.8259(7) 0.071(3) Uiso 0.421(8) 1 d PD A 2 
H5S3 H 0.7185 0.0945 0.8412 0.085 Uiso 0.421(8) 1 calc PR A 2 
H5S4 H 0.7028 0.0459 0.8739 0.085 Uiso 0.421(8) 1 calc PR A 2 
C6SA C 0.7267(17) 0.0481(7) 0.7489(11) 0.092(7) Uiso 0.421(8) 1 d PD A 2 
H6S3 H 0.7582 0.0719 0.7160 0.110 Uiso 0.421(8) 1 calc PR A 2 
H6S4 H 0.8029 0.0274 0.7646 0.110 Uiso 0.421(8) 1 calc PR A 2 
C7SA C 0.4948(19) 0.0530(7) 0.7122(11) 0.129(7) Uiso 0.421(8) 1 d PD A 2 
H7S3 H 0.4096 0.0356 0.7018 0.155 Uiso 0.421(8) 1 calc PR A 2 
H7S4 H 0.4850 0.0775 0.6727 0.155 Uiso 0.421(8) 1 calc PR A 2 
C8SA C 0.5214(12) 0.0684(4) 0.7978(9) 0.074(4) Uiso 0.421(8) 1 d PD A 2 
H8S3 H 0.4738 0.0502 0.8337 0.089 Uiso 0.421(8) 1 calc PR A 2 
H8S4 H 0.4894 0.0986 0.8008 0.089 Uiso 0.421(8) 1 calc PR A 2 
 
loop_ 
 _atom_site_aniso_label 
 _atom_site_aniso_U_11 
 _atom_site_aniso_U_22 
 _atom_site_aniso_U_33 
 _atom_site_aniso_U_23 
 _atom_site_aniso_U_13 
 _atom_site_aniso_U_12 
Ca1 0.0192(3) 0.0271(3) 0.0269(3) 0.0000(2) 0.0059(2) 0.0007(2) 
O1 0.0297(11) 0.0468(13) 0.0343(11) -0.0103(10) 0.0081(9) -0.0023(9) 
O2 0.0426(13) 0.0441(13) 0.0404(13) 0.0088(10) 0.0006(10) 0.0050(10) 
O3 0.0199(10) 0.0407(12) 0.0424(12) 0.0059(10) 0.0026(9) -0.0018(9) 
O4 0.0301(11) 0.0358(12) 0.0455(13) -0.0089(10) 0.0133(9) 0.0027(9) 
N1 0.0221(11) 0.0257(12) 0.0302(12) 0.0016(10) 0.0094(9) 0.0010(9) 
N2 0.0218(11) 0.0266(12) 0.0296(12) 0.0002(10) 0.0067(9) -0.0007(9) 
C1 0.0201(13) 0.0267(14) 0.0276(14) -0.0009(11) 0.0052(11) 0.0030(11) 
C2 0.0178(13) 0.0287(15) 0.0295(14) -0.0005(11) 0.0069(11) 0.0010(11) 
C3 0.0165(12) 0.0309(15) 0.0286(14) 0.0036(12) 0.0037(11) -0.0011(11) 
C4 0.0193(13) 0.0344(16) 0.0308(15) 0.0027(12) 0.0059(11) 0.0003(12) 
C5 0.0251(14) 0.0434(18) 0.0312(15) 0.0059(13) 0.0089(12) -0.0037(13) 
C6 0.0318(16) 0.0342(16) 0.0368(16) 0.0078(13) 0.0081(13) -0.0062(13) 
C7 0.0306(15) 0.0286(15) 0.0376(17) 0.0003(13) 0.0041(13) -0.0006(12) 
C8 0.0204(13) 0.0296(15) 0.0315(15) 0.0024(12) 0.0044(11) -0.0002(11) 
C9 0.0329(16) 0.0338(16) 0.0324(16) 0.0020(13) 0.0122(13) 0.0016(13) 
C10 0.0412(18) 0.0385(18) 0.0376(17) -0.0031(14) 0.0097(14) 0.0000(14) 
C11 0.0412(18) 0.0432(18) 0.0448(19) -0.0007(15) 0.0219(15) 0.0046(15) 
C12 0.0343(16) 0.0284(15) 0.0331(16) -0.0006(12) 0.0089(13) 0.0001(12) 
C13 0.056(2) 0.0399(18) 0.0371(18) -0.0042(15) 0.0064(16) -0.0103(16) 
C14 0.0416(18) 0.0378(18) 0.0473(19) -0.0017(15) 0.0211(15) 0.0042(14) 
C15 0.0194(13) 0.0265(14) 0.0367(16) -0.0016(12) 0.0092(12) 0.0026(11) 
C16 0.0281(15) 0.0275(15) 0.0375(16) -0.0028(12) 0.0078(13) -0.0008(12) 
C17 0.0339(16) 0.0336(17) 0.0474(19) -0.0039(14) 0.0029(14) -0.0038(13) 
C18 0.0401(18) 0.0287(16) 0.063(2) 0.0023(15) 0.0082(16) -0.0098(14) 
C19 0.0455(19) 0.0317(17) 0.0484(19) 0.0069(15) 0.0123(16) -0.0036(14) 
C20 0.0266(14) 0.0282(15) 0.0398(17) 0.0028(13) 0.0107(13) 0.0023(12) 
C21 0.0389(17) 0.0382(17) 0.0313(16) -0.0031(13) 0.0046(13) -0.0114(14) 
C22 0.060(2) 0.055(2) 0.0411(19) -0.0131(17) 0.0114(17) -0.0145(18) 
C23 0.049(2) 0.046(2) 0.0387(18) 0.0069(15) -0.0025(15) -0.0098(16) 
C24 0.0351(16) 0.0340(16) 0.0351(16) 0.0071(13) 0.0098(13) 0.0011(13) 
C25 0.080(3) 0.047(2) 0.046(2) 0.0127(17) 0.003(2) 0.011(2) 
C26 0.046(2) 0.050(2) 0.047(2) -0.0057(16) 0.0128(16) 0.0015(16) 
C27 0.0328(16) 0.060(2) 0.0344(17) -0.0064(15) 0.0107(14) -0.0039(15) 
C28 0.0471(19) 0.049(2) 0.0409(18) 0.0018(15) 0.0204(16) 0.0089(16) 
C29 0.052(2) 0.048(2) 0.0410(19) -0.0115(16) 0.0127(16) -0.0101(16) 
C30 0.0337(17) 0.0452(19) 0.0456(19) -0.0076(15) 0.0045(14) -0.0052(14) 
C31 0.122(4) 0.058(3) 0.065(3) 0.013(2) 0.004(3) 0.042(3) 
C32 0.128(5) 0.057(3) 0.072(3) 0.016(2) -0.023(3) 0.021(3) 
C33 0.108(4) 0.072(3) 0.060(3) 0.017(2) -0.012(3) 0.025(3) 
C34 0.068(3) 0.063(3) 0.042(2) 0.0128(18) -0.0027(18) 0.005(2) 
C35 0.0314(16) 0.0409(18) 0.0432(18) 0.0057(14) 0.0038(14) 0.0006(14) 
C36 0.0292(15) 0.0356(17) 0.0431(18) 0.0026(14) 0.0096(13) 0.0009(13) 
C37 0.0259(15) 0.0445(19) 0.0465(19) -0.0099(15) 0.0075(14) -0.0001(13) 
C38 0.0238(15) 0.0474(19) 0.0407(18) 0.0025(14) 0.0027(13) 0.0022(13) 
C39 0.052(2) 0.065(3) 0.087(3) -0.042(2) 0.027(2) -0.013(2) 
C40 0.058(3) 0.091(3) 0.076(3) -0.044(3) 0.020(2) -0.002(2) 
C41 0.063(3) 0.090(3) 0.078(3) -0.043(3) 0.034(2) -0.019(2) 
C42 0.0359(17) 0.0433(19) 0.050(2) -0.0061(15) 0.0195(15) 0.0016(14) 
O5 0.0786(19) 0.0464(15) 0.0541(15) -0.0018(12) 0.0209(14) -0.0111(13) 
C1S 0.047(2) 0.047(2) 0.055(2) -0.0028(17) 0.0098(17) -0.0108(16) 
C2S 0.092(3) 0.062(3) 0.064(3) 0.006(2) 0.034(2) 0.002(2) 
C3S 0.122(5) 0.066(3) 0.103(4) 0.012(3) 0.068(4) 0.002(3) 
C4S 0.112(4) 0.073(3) 0.059(3) 0.010(2) 0.013(3) -0.042(3) 
 
_geom_special_details 
; 
 All esds (except the esd in the dihedral angle between two l.s. planes) 
 are estimated using the full covariance matrix.  The cell esds are taken 
 into account individually in the estimation of esds in distances, angles 
 and torsion angles; correlations between esds in cell parameters are only 
 used when they are defined by crystal symmetry.  An approximate (isotropic) 
 treatment of cell esds is used for estimating esds involving l.s. planes. 
; 
 
loop_ 
 _geom_bond_atom_site_label_1 
 _geom_bond_atom_site_label_2 
 _geom_bond_distance 
 _geom_bond_site_symmetry_2 
 _geom_bond_publ_flag 
Ca1 N2 2.335(2) . ? 
Ca1 N1 2.361(2) . ? 
Ca1 O4 2.399(2) . ? 
Ca1 O1 2.399(2) . ? 
Ca1 O3 2.434(2) . ? 
Ca1 O2 2.499(2) . ? 
Ca1 C2 2.917(3) . ? 
Ca1 C1 2.929(3) . ? 
O1 C27 1.436(4) . ? 
O1 C30 1.462(4) . ? 
O2 C31 1.434(5) . ? 
O2 C34 1.445(4) . ? 
O3 C38 1.437(3) . ? 
O3 C35 1.461(4) . ? 
O4 C42 1.444(4) . ? 
O4 C39 1.446(4) . ? 
N1 C3 1.391(3) . ? 
N1 C1 1.396(3) . ? 
N2 C2 1.401(3) . ? 
N2 C15 1.401(3) . ? 
C1 C2 1.356(4) . ? 
C1 H1 0.9500 . ? 
C2 H2 0.9500 . ? 
C3 C8 1.424(4) . ? 
C3 C4 1.434(4) . ? 
C4 C5 1.382(4) . ? 
C4 C9 1.519(4) . ? 
C5 C6 1.390(4) . ? 
C5 H5 0.9500 . ? 
C6 C7 1.380(4) . ? 
C6 H6 0.9500 . ? 
C7 C8 1.392(4) . ? 
C7 H7 0.9500 . ? 
C8 C12 1.525(4) . ? 
C9 C11 1.530(4) . ? 
C9 C10 1.530(4) . ? 
C9 H9 1.0000 . ? 
C10 H10A 0.9800 . ? 
C10 H10B 0.9800 . ? 
C10 H10C 0.9800 . ? 
C11 H11A 0.9800 . ? 
C11 H11B 0.9800 . ? 
C11 H11C 0.9800 . ? 
C12 C13 1.524(4) . ? 
C12 C14 1.528(4) . ? 
C12 H12 1.0000 . ? 
C13 H13A 0.9800 . ? 
C13 H13B 0.9800 . ? 
C13 H13C 0.9800 . ? 
C14 H14A 0.9800 . ? 
C14 H14B 0.9800 . ? 
C14 H14C 0.9800 . ? 
C15 C20 1.418(4) . ? 
C15 C16 1.420(4) . ? 
C16 C17 1.394(4) . ? 
C16 C21 1.520(4) . ? 
C17 C18 1.384(5) . ? 
C17 H17 0.9500 . ? 
C18 C19 1.376(5) . ? 
C18 H18 0.9500 . ? 
C19 C20 1.395(4) . ? 
C19 H19 0.9500 . ? 
C20 C24 1.521(4) . ? 
C21 C22 1.531(5) . ? 
C21 C23 1.532(5) . ? 
C21 H21 1.0000 . ? 
C22 H22A 0.9800 . ? 
C22 H22B 0.9800 . ? 
C22 H22C 0.9800 . ? 
C23 H23A 0.9800 . ? 
C23 H23B 0.9800 . ? 
C23 H23C 0.9800 . ? 
C24 C26 1.521(4) . ? 
C24 C25 1.523(4) . ? 
C24 H24 1.0000 . ? 
C25 H25A 0.9800 . ? 
C25 H25B 0.9800 . ? 
C25 H25C 0.9800 . ? 
C26 H26A 0.9800 . ? 
C26 H26B 0.9800 . ? 
C26 H26C 0.9800 . ? 
C27 C28 1.503(5) . ? 
C27 H27A 0.9900 . ? 
C27 H27B 0.9900 . ? 
C28 C29 1.509(5) . ? 
C28 H28A 0.9900 . ? 
C28 H28B 0.9900 . ? 
C29 C30 1.494(5) . ? 
C29 H29A 0.9900 . ? 
C29 H29B 0.9900 . ? 
C30 H30A 0.9900 . ? 
C30 H30B 0.9900 . ? 
C31 C32 1.487(6) . ? 
C31 H31A 0.9900 . ? 
C31 H31B 0.9900 . ? 
C32 C33 1.466(7) . ? 
C32 H32A 0.9900 . ? 
C32 H32B 0.9900 . ? 
C33 C34 1.505(6) . ? 
C33 H33A 0.9900 . ? 
C33 H33B 0.9900 . ? 
C34 H34A 0.9900 . ? 
C34 H34B 0.9900 . ? 
C35 C36 1.504(4) . ? 
C35 H35A 0.9900 . ? 
C35 H35B 0.9900 . ? 
C36 C37 1.505(4) . ? 
C36 H36A 0.9900 . ? 
C36 H36B 0.9900 . ? 
C37 C38 1.506(4) . ? 
C37 H37A 0.9900 . ? 
C37 H37B 0.9900 . ? 
C38 H38A 0.9900 . ? 
C38 H38B 0.9900 . ? 
C39 C40 1.533(6) . ? 
C39 H39A 0.9900 . ? 
C39 H39B 0.9900 . ? 
C40 C41 1.439(6) . ? 
C40 H40A 0.9900 . ? 
C40 H40B 0.9900 . ? 
C41 C42 1.502(5) . ? 
C41 H41A 0.9900 . ? 
C41 H41B 0.9900 . ? 
C42 H42A 0.9900 . ? 
C42 H42B 0.9900 . ? 
O5 C4S 1.415(5) . ? 
O5 C1S 1.419(4) . ? 
C1S C2S 1.482(5) . ? 
C1S H1SA 0.9900 . ? 
C1S H1SB 0.9900 . ? 
C2S C3S 1.479(6) . ? 
C2S H2SA 0.9900 . ? 
C2S H2SB 0.9900 . ? 
C3S C4S 1.515(7) . ? 
C3S H3SA 0.9900 . ? 
C3S H3SB 0.9900 . ? 
C4S H4SA 0.9900 . ? 
C4S H4SB 0.9900 . ? 
O6 C8S 1.392(10) . ? 
O6 C5S 1.417(8) . ? 
C5S C6S 1.467(12) . ? 
C5S H5S1 0.9900 . ? 
C5S H5S2 0.9900 . ? 
C6S C7S 1.562(12) . ? 
C6S H6S1 0.9900 . ? 
C6S H6S2 0.9900 . ? 
C7S C8S 1.526(12) . ? 
C7S H7S1 0.9900 . ? 
C7S H7S2 0.9900 . ? 
C8S H8S1 0.9900 . ? 
C8S H8S2 0.9900 . ? 
O6A C7SA 1.423(15) . ? 
O6A C6SA 1.428(15) . ? 
C5SA C6SA 1.515(15) . ? 
C5SA C8SA 1.550(13) . ? 
C5SA H5S3 0.9900 . ? 
C5SA H5S4 0.9900 . ? 
C6SA H6S3 0.9900 . ? 
C6SA H6S4 0.9900 . ? 
C7SA C8SA 1.454(16) . ? 
C7SA H7S3 0.9900 . ? 
C7SA H7S4 0.9900 . ? 
C8SA H8S3 0.9900 . ? 
C8SA H8S4 0.9900 . ? 
 
loop_ 
 _geom_angle_atom_site_label_1 
 _geom_angle_atom_site_label_2 
 _geom_angle_atom_site_label_3 
 _geom_angle 
 _geom_angle_site_symmetry_1 
 _geom_angle_site_symmetry_3 
 _geom_angle_publ_flag 
N2 Ca1 N1 78.50(8) . . ? 
N2 Ca1 O4 95.46(8) . . ? 
N1 Ca1 O4 103.68(8) . . ? 
N2 Ca1 O1 101.33(8) . . ? 
N1 Ca1 O1 96.60(8) . . ? 
O4 Ca1 O1 155.88(8) . . ? 
N2 Ca1 O3 169.63(8) . . ? 
N1 Ca1 O3 92.69(7) . . ? 
O4 Ca1 O3 81.21(7) . . ? 
O1 Ca1 O3 84.97(7) . . ? 
N2 Ca1 O2 105.76(8) . . ? 
N1 Ca1 O2 173.69(8) . . ? 
O4 Ca1 O2 80.75(8) . . ? 
O1 Ca1 O2 78.11(8) . . ? 
O3 Ca1 O2 83.49(7) . . ? 
N2 Ca1 C2 28.25(8) . . ? 
N1 Ca1 C2 53.51(7) . . ? 
O4 Ca1 C2 112.06(7) . . ? 
O1 Ca1 C2 90.44(7) . . ? 
O3 Ca1 C2 145.18(7) . . ? 
O2 Ca1 C2 129.27(8) . . ? 
N2 Ca1 C1 54.38(8) . . ? 
N1 Ca1 C1 28.05(7) . . ? 
O4 Ca1 C1 116.36(8) . . ? 
O1 Ca1 C1 87.61(7) . . ? 
O3 Ca1 C1 118.37(7) . . ? 
O2 Ca1 C1 152.93(8) . . ? 
C2 Ca1 C1 26.82(7) . . ? 
C27 O1 C30 109.4(2) . . ? 
C27 O1 Ca1 119.30(17) . . ? 
C30 O1 Ca1 130.60(18) . . ? 
C31 O2 C34 108.6(3) . . ? 
C31 O2 Ca1 123.7(2) . . ? 
C34 O2 Ca1 127.7(2) . . ? 
C38 O3 C35 108.2(2) . . ? 
C38 O3 Ca1 133.71(18) . . ? 
C35 O3 Ca1 118.09(16) . . ? 
C42 O4 C39 108.4(2) . . ? 
C42 O4 Ca1 135.20(18) . . ? 
C39 O4 Ca1 115.63(18) . . ? 
C3 N1 C1 116.8(2) . . ? 
C3 N1 Ca1 138.74(17) . . ? 
C1 N1 Ca1 99.23(16) . . ? 
C2 N2 C15 113.1(2) . . ? 
C2 N2 Ca1 99.66(16) . . ? 
C15 N2 Ca1 146.37(17) . . ? 
C2 C1 N1 123.8(2) . . ? 
C2 C1 Ca1 76.10(16) . . ? 
N1 C1 Ca1 52.71(13) . . ? 
C2 C1 H1 118.1 . . ? 
N1 C1 H1 118.1 . . ? 
Ca1 C1 H1 154.0 . . ? 
C1 C2 N2 126.6(2) . . ? 
C1 C2 Ca1 77.09(16) . . ? 
N2 C2 Ca1 52.09(12) . . ? 
C1 C2 H2 116.7 . . ? 
N2 C2 H2 116.7 . . ? 
Ca1 C2 H2 158.9 . . ? 
N1 C3 C8 124.8(2) . . ? 
N1 C3 C4 117.5(2) . . ? 
C8 C3 C4 117.5(2) . . ? 
C5 C4 C3 119.8(3) . . ? 
C5 C4 C9 121.6(3) . . ? 
C3 C4 C9 118.4(2) . . ? 
C4 C5 C6 122.1(3) . . ? 
C4 C5 H5 118.9 . . ? 
C6 C5 H5 118.9 . . ? 
C7 C6 C5 118.3(3) . . ? 
C7 C6 H6 120.8 . . ? 
C5 C6 H6 120.8 . . ? 
C6 C7 C8 122.1(3) . . ? 
C6 C7 H7 118.9 . . ? 
C8 C7 H7 118.9 . . ? 
C7 C8 C3 119.9(3) . . ? 
C7 C8 C12 117.9(3) . . ? 
C3 C8 C12 122.0(2) . . ? 
C4 C9 C11 114.6(2) . . ? 
C4 C9 C10 109.3(2) . . ? 
C11 C9 C10 110.1(3) . . ? 
C4 C9 H9 107.5 . . ? 
C11 C9 H9 107.5 . . ? 
C10 C9 H9 107.5 . . ? 
C9 C10 H10A 109.5 . . ? 
C9 C10 H10B 109.5 . . ? 
H10A C10 H10B 109.5 . . ? 
C9 C10 H10C 109.5 . . ? 
H10A C10 H10C 109.5 . . ? 
H10B C10 H10C 109.5 . . ? 
C9 C11 H11A 109.5 . . ? 
C9 C11 H11B 109.5 . . ? 
H11A C11 H11B 109.5 . . ? 
C9 C11 H11C 109.5 . . ? 
H11A C11 H11C 109.5 . . ? 
H11B C11 H11C 109.5 . . ? 
C13 C12 C8 111.7(2) . . ? 
C13 C12 C14 109.1(3) . . ? 
C8 C12 C14 112.4(2) . . ? 
C13 C12 H12 107.8 . . ? 
C8 C12 H12 107.8 . . ? 
C14 C12 H12 107.8 . . ? 
C12 C13 H13A 109.5 . . ? 
C12 C13 H13B 109.5 . . ? 
H13A C13 H13B 109.5 . . ? 
C12 C13 H13C 109.5 . . ? 
H13A C13 H13C 109.5 . . ? 
H13B C13 H13C 109.5 . . ? 
C12 C14 H14A 109.5 . . ? 
C12 C14 H14B 109.5 . . ? 
H14A C14 H14B 109.5 . . ? 
C12 C14 H14C 109.5 . . ? 
H14A C14 H14C 109.5 . . ? 
H14B C14 H14C 109.5 . . ? 
N2 C15 C20 120.2(3) . . ? 
N2 C15 C16 122.0(3) . . ? 
C20 C15 C16 117.8(3) . . ? 
C17 C16 C15 119.9(3) . . ? 
C17 C16 C21 118.6(3) . . ? 
C15 C16 C21 121.5(3) . . ? 
C18 C17 C16 121.5(3) . . ? 
C18 C17 H17 119.2 . . ? 
C16 C17 H17 119.2 . . ? 
C19 C18 C17 119.0(3) . . ? 
C19 C18 H18 120.5 . . ? 
C17 C18 H18 120.5 . . ? 
C18 C19 C20 121.5(3) . . ? 
C18 C19 H19 119.2 . . ? 
C20 C19 H19 119.2 . . ? 
C19 C20 C15 120.1(3) . . ? 
C19 C20 C24 120.0(3) . . ? 
C15 C20 C24 119.5(3) . . ? 
C16 C21 C22 111.3(3) . . ? 
C16 C21 C23 112.5(3) . . ? 
C22 C21 C23 109.3(3) . . ? 
C16 C21 H21 107.8 . . ? 
C22 C21 H21 107.8 . . ? 
C23 C21 H21 107.8 . . ? 
C21 C22 H22A 109.5 . . ? 
C21 C22 H22B 109.5 . . ? 
H22A C22 H22B 109.5 . . ? 
C21 C22 H22C 109.5 . . ? 
H22A C22 H22C 109.5 . . ? 
H22B C22 H22C 109.5 . . ? 
C21 C23 H23A 109.5 . . ? 
C21 C23 H23B 109.5 . . ? 
H23A C23 H23B 109.5 . . ? 
C21 C23 H23C 109.5 . . ? 
H23A C23 H23C 109.5 . . ? 
H23B C23 H23C 109.5 . . ? 
C26 C24 C20 109.5(3) . . ? 
C26 C24 C25 110.2(3) . . ? 
C20 C24 C25 114.5(3) . . ? 
C26 C24 H24 107.4 . . ? 
C20 C24 H24 107.4 . . ? 
C25 C24 H24 107.4 . . ? 
C24 C25 H25A 109.5 . . ? 
C24 C25 H25B 109.5 . . ? 
H25A C25 H25B 109.5 . . ? 
C24 C25 H25C 109.5 . . ? 
H25A C25 H25C 109.5 . . ? 
H25B C25 H25C 109.5 . . ? 
C24 C26 H26A 109.5 . . ? 
C24 C26 H26B 109.5 . . ? 
H26A C26 H26B 109.5 . . ? 
C24 C26 H26C 109.5 . . ? 
H26A C26 H26C 109.5 . . ? 
H26B C26 H26C 109.5 . . ? 
O1 C27 C28 105.2(3) . . ? 
O1 C27 H27A 110.7 . . ? 
C28 C27 H27A 110.7 . . ? 
O1 C27 H27B 110.7 . . ? 
C28 C27 H27B 110.7 . . ? 
H27A C27 H27B 108.8 . . ? 
C27 C28 C29 102.2(3) . . ? 
C27 C28 H28A 111.3 . . ? 
C29 C28 H28A 111.3 . . ? 
C27 C28 H28B 111.3 . . ? 
C29 C28 H28B 111.3 . . ? 
H28A C28 H28B 109.2 . . ? 
C30 C29 C28 103.4(3) . . ? 
C30 C29 H29A 111.1 . . ? 
C28 C29 H29A 111.1 . . ? 
C30 C29 H29B 111.1 . . ? 
C28 C29 H29B 111.1 . . ? 
H29A C29 H29B 109.0 . . ? 
O1 C30 C29 105.5(3) . . ? 
O1 C30 H30A 110.6 . . ? 
C29 C30 H30A 110.6 . . ? 
O1 C30 H30B 110.6 . . ? 
C29 C30 H30B 110.6 . . ? 
H30A C30 H30B 108.8 . . ? 
O2 C31 C32 106.4(4) . . ? 
O2 C31 H31A 110.5 . . ? 
C32 C31 H31A 110.5 . . ? 
O2 C31 H31B 110.5 . . ? 
C32 C31 H31B 110.5 . . ? 
H31A C31 H31B 108.6 . . ? 
C33 C32 C31 103.1(4) . . ? 
C33 C32 H32A 111.1 . . ? 
C31 C32 H32A 111.1 . . ? 
C33 C32 H32B 111.1 . . ? 
C31 C32 H32B 111.1 . . ? 
H32A C32 H32B 109.1 . . ? 
C32 C33 C34 104.4(4) . . ? 
C32 C33 H33A 110.9 . . ? 
C34 C33 H33A 110.9 . . ? 
C32 C33 H33B 110.9 . . ? 
C34 C33 H33B 110.9 . . ? 
H33A C33 H33B 108.9 . . ? 
O2 C34 C33 105.5(3) . . ? 
O2 C34 H34A 110.6 . . ? 
C33 C34 H34A 110.6 . . ? 
O2 C34 H34B 110.6 . . ? 
C33 C34 H34B 110.6 . . ? 
H34A C34 H34B 108.8 . . ? 
O3 C35 C36 105.5(2) . . ? 
O3 C35 H35A 110.6 . . ? 
C36 C35 H35A 110.6 . . ? 
O3 C35 H35B 110.6 . . ? 
C36 C35 H35B 110.6 . . ? 
H35A C35 H35B 108.8 . . ? 
C35 C36 C37 102.5(2) . . ? 
C35 C36 H36A 111.3 . . ? 
C37 C36 H36A 111.3 . . ? 
C35 C36 H36B 111.3 . . ? 
C37 C36 H36B 111.3 . . ? 
H36A C36 H36B 109.2 . . ? 
C36 C37 C38 100.7(2) . . ? 
C36 C37 H37A 111.6 . . ? 
C38 C37 H37A 111.6 . . ? 
C36 C37 H37B 111.6 . . ? 
C38 C37 H37B 111.6 . . ? 
H37A C37 H37B 109.4 . . ? 
O3 C38 C37 105.4(2) . . ? 
O3 C38 H38A 110.7 . . ? 
C37 C38 H38A 110.7 . . ? 
O3 C38 H38B 110.7 . . ? 
C37 C38 H38B 110.7 . . ? 
H38A C38 H38B 108.8 . . ? 
O4 C39 C40 104.1(3) . . ? 
O4 C39 H39A 110.9 . . ? 
C40 C39 H39A 110.9 . . ? 
O4 C39 H39B 110.9 . . ? 
C40 C39 H39B 110.9 . . ? 
H39A C39 H39B 109.0 . . ? 
C41 C40 C39 101.4(4) . . ? 
C41 C40 H40A 111.5 . . ? 
C39 C40 H40A 111.5 . . ? 
C41 C40 H40B 111.5 . . ? 
C39 C40 H40B 111.5 . . ? 
H40A C40 H40B 109.3 . . ? 
C40 C41 C42 105.8(3) . . ? 
C40 C41 H41A 110.6 . . ? 
C42 C41 H41A 110.6 . . ? 
C40 C41 H41B 110.6 . . ? 
C42 C41 H41B 110.6 . . ? 
H41A C41 H41B 108.7 . . ? 
O4 C42 C41 105.5(3) . . ? 
O4 C42 H42A 110.7 . . ? 
C41 C42 H42A 110.7 . . ? 
O4 C42 H42B 110.7 . . ? 
C41 C42 H42B 110.7 . . ? 
H42A C42 H42B 108.8 . . ? 
C4S O5 C1S 105.6(3) . . ? 
O5 C1S C2S 106.9(3) . . ? 
O5 C1S H1SA 110.3 . . ? 
C2S C1S H1SA 110.3 . . ? 
O5 C1S H1SB 110.3 . . ? 
C2S C1S H1SB 110.3 . . ? 
H1SA C1S H1SB 108.6 . . ? 
C3S C2S C1S 104.6(4) . . ? 
C3S C2S H2SA 110.8 . . ? 
C1S C2S H2SA 110.8 . . ? 
C3S C2S H2SB 110.8 . . ? 
C1S C2S H2SB 110.8 . . ? 
H2SA C2S H2SB 108.9 . . ? 
C2S C3S C4S 105.4(4) . . ? 
C2S C3S H3SA 110.7 . . ? 
C4S C3S H3SA 110.7 . . ? 
C2S C3S H3SB 110.7 . . ? 
C4S C3S H3SB 110.7 . . ? 
H3SA C3S H3SB 108.8 . . ? 
O5 C4S C3S 106.0(4) . . ? 
O5 C4S H4SA 110.5 . . ? 
C3S C4S H4SA 110.5 . . ? 
O5 C4S H4SB 110.5 . . ? 
C3S C4S H4SB 110.5 . . ? 
H4SA C4S H4SB 108.7 . . ? 
C8S O6 C5S 104.8(6) . . ? 
O6 C5S C6S 109.0(7) . . ? 
O6 C5S H5S1 109.9 . . ? 
C6S C5S H5S1 109.9 . . ? 
O6 C5S H5S2 109.9 . . ? 
C6S C5S H5S2 109.9 . . ? 
H5S1 C5S H5S2 108.3 . . ? 
C5S C6S C7S 105.5(8) . . ? 
C5S C6S H6S1 110.6 . . ? 
C7S C6S H6S1 110.6 . . ? 
C5S C6S H6S2 110.6 . . ? 
C7S C6S H6S2 110.6 . . ? 
H6S1 C6S H6S2 108.8 . . ? 
C8S C7S C6S 99.0(8) . . ? 
C8S C7S H7S1 112.0 . . ? 
C6S C7S H7S1 112.0 . . ? 
C8S C7S H7S2 112.0 . . ? 
C6S C7S H7S2 112.0 . . ? 
H7S1 C7S H7S2 109.6 . . ? 
O6 C8S C7S 107.8(7) . . ? 
O6 C8S H8S1 110.2 . . ? 
C7S C8S H8S1 110.2 . . ? 
O6 C8S H8S2 110.2 . . ? 
C7S C8S H8S2 110.2 . . ? 
H8S1 C8S H8S2 108.5 . . ? 
C7SA O6A C6SA 106.1(12) . . ? 
C6SA C5SA C8SA 102.7(10) . . ? 
C6SA C5SA H5S3 111.2 . . ? 
C8SA C5SA H5S3 111.2 . . ? 
C6SA C5SA H5S4 111.2 . . ? 
C8SA C5SA H5S4 111.2 . . ? 
H5S3 C5SA H5S4 109.1 . . ? 
O6A C6SA C5SA 105.0(11) . . ? 
O6A C6SA H6S3 110.8 . . ? 
C5SA C6SA H6S3 110.8 . . ? 
O6A C6SA H6S4 110.8 . . ? 
C5SA C6SA H6S4 110.8 . . ? 
H6S3 C6SA H6S4 108.8 . . ? 
O6A C7SA C8SA 106.0(13) . . ? 
O6A C7SA H7S3 110.5 . . ? 
C8SA C7SA H7S3 110.5 . . ? 
O6A C7SA H7S4 110.5 . . ? 
C8SA C7SA H7S4 110.5 . . ? 
H7S3 C7SA H7S4 108.7 . . ? 
C7SA C8SA C5SA 105.8(12) . . ? 
C7SA C8SA H8S3 110.6 . . ? 
C5SA C8SA H8S3 110.6 . . ? 
C7SA C8SA H8S4 110.6 . . ? 
C5SA C8SA H8S4 110.6 . . ? 
H8S3 C8SA H8S4 108.7 . . ? 
 
loop_ 
 _geom_torsion_atom_site_label_1 
 _geom_torsion_atom_site_label_2 
 _geom_torsion_atom_site_label_3 
 _geom_torsion_atom_site_label_4 
 _geom_torsion 
 _geom_torsion_site_symmetry_1 
 _geom_torsion_site_symmetry_2 
 _geom_torsion_site_symmetry_3 
 _geom_torsion_site_symmetry_4 
 _geom_torsion_publ_flag 
N2 Ca1 O1 C27 0.3(2) . . . . ? 
N1 Ca1 O1 C27 79.8(2) . . . . ? 
O4 Ca1 O1 C27 -132.9(2) . . . . ? 
O3 Ca1 O1 C27 171.9(2) . . . . ? 
O2 Ca1 O1 C27 -103.7(2) . . . . ? 
C2 Ca1 O1 C27 26.5(2) . . . . ? 
C1 Ca1 O1 C27 53.2(2) . . . . ? 
N2 Ca1 O1 C30 -169.1(2) . . . . ? 
N1 Ca1 O1 C30 -89.6(2) . . . . ? 
O4 Ca1 O1 C30 57.7(3) . . . . ? 
O3 Ca1 O1 C30 2.6(2) . . . . ? 
O2 Ca1 O1 C30 87.0(2) . . . . ? 
C2 Ca1 O1 C30 -142.8(2) . . . . ? 
C1 Ca1 O1 C30 -116.2(3) . . . . ? 
N2 Ca1 O2 C31 95.5(3) . . . . ? 
N1 Ca1 O2 C31 -132.6(7) . . . . ? 
O4 Ca1 O2 C31 2.4(3) . . . . ? 
O1 Ca1 O2 C31 -165.9(3) . . . . ? 
O3 Ca1 O2 C31 -79.7(3) . . . . ? 
C2 Ca1 O2 C31 113.4(3) . . . . ? 
C1 Ca1 O2 C31 134.5(3) . . . . ? 
N2 Ca1 O2 C34 -84.4(3) . . . . ? 
N1 Ca1 O2 C34 47.5(8) . . . . ? 
O4 Ca1 O2 C34 -177.5(3) . . . . ? 
O1 Ca1 O2 C34 14.2(3) . . . . ? 
O3 Ca1 O2 C34 100.4(3) . . . . ? 
C2 Ca1 O2 C34 -66.5(3) . . . . ? 
C1 Ca1 O2 C34 -45.4(4) . . . . ? 
N2 Ca1 O3 C38 -158.7(4) . . . . ? 
N1 Ca1 O3 C38 169.7(3) . . . . ? 
O4 Ca1 O3 C38 -86.9(3) . . . . ? 
O1 Ca1 O3 C38 73.3(3) . . . . ? 
O2 Ca1 O3 C38 -5.2(3) . . . . ? 
C2 Ca1 O3 C38 156.8(2) . . . . ? 
C1 Ca1 O3 C38 157.9(2) . . . . ? 
N2 Ca1 O3 C35 20.9(5) . . . . ? 
N1 Ca1 O3 C35 -10.6(2) . . . . ? 
O4 Ca1 O3 C35 92.8(2) . . . . ? 
O1 Ca1 O3 C35 -107.0(2) . . . . ? 
O2 Ca1 O3 C35 174.4(2) . . . . ? 
C2 Ca1 O3 C35 -23.5(3) . . . . ? 
C1 Ca1 O3 C35 -22.5(2) . . . . ? 
N2 Ca1 O4 C42 162.8(3) . . . . ? 
N1 Ca1 O4 C42 83.4(3) . . . . ? 
O1 Ca1 O4 C42 -63.1(4) . . . . ? 
O3 Ca1 O4 C42 -7.3(3) . . . . ? 
O2 Ca1 O4 C42 -92.1(3) . . . . ? 
C2 Ca1 O4 C42 139.2(3) . . . . ? 
C1 Ca1 O4 C42 110.1(3) . . . . ? 
N2 Ca1 O4 C39 -5.5(3) . . . . ? 
N1 Ca1 O4 C39 -84.9(3) . . . . ? 
O1 Ca1 O4 C39 128.7(3) . . . . ? 
O3 Ca1 O4 C39 -175.6(3) . . . . ? 
O2 Ca1 O4 C39 99.7(3) . . . . ? 
C2 Ca1 O4 C39 -29.1(3) . . . . ? 
C1 Ca1 O4 C39 -58.2(3) . . . . ? 
N2 Ca1 N1 C3 179.5(3) . . . . ? 
O4 Ca1 N1 C3 -87.6(3) . . . . ? 
O1 Ca1 N1 C3 79.2(3) . . . . ? 
O3 Ca1 N1 C3 -6.0(3) . . . . ? 
O2 Ca1 N1 C3 46.5(9) . . . . ? 
C2 Ca1 N1 C3 164.9(3) . . . . ? 
C1 Ca1 N1 C3 151.4(4) . . . . ? 
N2 Ca1 N1 C1 28.12(16) . . . . ? 
O4 Ca1 N1 C1 121.00(16) . . . . ? 
O1 Ca1 N1 C1 -72.15(16) . . . . ? 
O3 Ca1 N1 C1 -157.39(16) . . . . ? 
O2 Ca1 N1 C1 -104.9(7) . . . . ? 
C2 Ca1 N1 C1 13.50(14) . . . . ? 
N1 Ca1 N2 C2 -25.39(15) . . . . ? 
O4 Ca1 N2 C2 -128.27(16) . . . . ? 
O1 Ca1 N2 C2 69.14(16) . . . . ? 
O3 Ca1 N2 C2 -57.6(5) . . . . ? 
O2 Ca1 N2 C2 149.82(15) . . . . ? 
C1 Ca1 N2 C2 -9.56(14) . . . . ? 
N1 Ca1 N2 C15 141.8(3) . . . . ? 
O4 Ca1 N2 C15 39.0(3) . . . . ? 
O1 Ca1 N2 C15 -123.6(3) . . . . ? 
O3 Ca1 N2 C15 109.6(5) . . . . ? 
O2 Ca1 N2 C15 -42.9(3) . . . . ? 
C2 Ca1 N2 C15 167.2(4) . . . . ? 
C1 Ca1 N2 C15 157.7(4) . . . . ? 
C3 N1 C1 C2 171.6(3) . . . . ? 
Ca1 N1 C1 C2 -29.1(3) . . . . ? 
C3 N1 C1 Ca1 -159.3(3) . . . . ? 
N2 Ca1 C1 C2 10.04(15) . . . . ? 
N1 Ca1 C1 C2 155.4(3) . . . . ? 
O4 Ca1 C1 C2 87.06(17) . . . . ? 
O1 Ca1 C1 C2 -95.74(16) . . . . ? 
O3 Ca1 C1 C2 -178.71(15) . . . . ? 
O2 Ca1 C1 C2 -38.1(3) . . . . ? 
N2 Ca1 C1 N1 -145.38(19) . . . . ? 
O4 Ca1 C1 N1 -68.36(17) . . . . ? 
O1 Ca1 C1 N1 108.85(16) . . . . ? 
O3 Ca1 C1 N1 25.87(18) . . . . ? 
O2 Ca1 C1 N1 166.51(17) . . . . ? 
C2 Ca1 C1 N1 -155.4(3) . . . . ? 
N1 C1 C2 N2 6.4(4) . . . . ? 
Ca1 C1 C2 N2 -17.1(2) . . . . ? 
N1 C1 C2 Ca1 23.5(2) . . . . ? 
C15 N2 C2 C1 -151.0(3) . . . . ? 
Ca1 N2 C2 C1 21.3(3) . . . . ? 
C15 N2 C2 Ca1 -172.3(3) . . . . ? 
N2 Ca1 C2 C1 -162.6(3) . . . . ? 
N1 Ca1 C2 C1 -14.09(15) . . . . ? 
O4 Ca1 C2 C1 -105.10(16) . . . . ? 
O1 Ca1 C2 C1 83.80(16) . . . . ? 
O3 Ca1 C2 C1 2.0(2) . . . . ? 
O2 Ca1 C2 C1 158.74(15) . . . . ? 
N1 Ca1 C2 N2 148.50(19) . . . . ? 
O4 Ca1 C2 N2 57.49(17) . . . . ? 
O1 Ca1 C2 N2 -113.61(16) . . . . ? 
O3 Ca1 C2 N2 164.57(16) . . . . ? 
O2 Ca1 C2 N2 -38.68(19) . . . . ? 
C1 Ca1 C2 N2 162.6(3) . . . . ? 
C1 N1 C3 C8 54.6(4) . . . . ? 
Ca1 N1 C3 C8 -93.4(3) . . . . ? 
C1 N1 C3 C4 -128.6(3) . . . . ? 
Ca1 N1 C3 C4 83.4(3) . . . . ? 
N1 C3 C4 C5 -176.7(2) . . . . ? 
C8 C3 C4 C5 0.4(4) . . . . ? 
N1 C3 C4 C9 7.2(4) . . . . ? 
C8 C3 C4 C9 -175.7(2) . . . . ? 
C3 C4 C5 C6 -3.0(4) . . . . ? 
C9 C4 C5 C6 173.0(3) . . . . ? 
C4 C5 C6 C7 2.3(4) . . . . ? 
C5 C6 C7 C8 1.1(4) . . . . ? 
C6 C7 C8 C3 -3.6(4) . . . . ? 
C6 C7 C8 C12 171.4(3) . . . . ? 
N1 C3 C8 C7 179.6(3) . . . . ? 
C4 C3 C8 C7 2.8(4) . . . . ? 
N1 C3 C8 C12 4.9(4) . . . . ? 
C4 C3 C8 C12 -172.0(2) . . . . ? 
C5 C4 C9 C11 28.8(4) . . . . ? 
C3 C4 C9 C11 -155.1(3) . . . . ? 
C5 C4 C9 C10 -95.3(3) . . . . ? 
C3 C4 C9 C10 80.8(3) . . . . ? 
C7 C8 C12 C13 -50.9(4) . . . . ? 
C3 C8 C12 C13 124.0(3) . . . . ? 
C7 C8 C12 C14 72.1(3) . . . . ? 
C3 C8 C12 C14 -113.1(3) . . . . ? 
C2 N2 C15 C20 -120.0(3) . . . . ? 
Ca1 N2 C15 C20 73.7(4) . . . . ? 
C2 N2 C15 C16 60.2(3) . . . . ? 
Ca1 N2 C15 C16 -106.1(3) . . . . ? 
N2 C15 C16 C17 -177.5(3) . . . . ? 
C20 C15 C16 C17 2.7(4) . . . . ? 
N2 C15 C16 C21 4.5(4) . . . . ? 
C20 C15 C16 C21 -175.2(3) . . . . ? 
C15 C16 C17 C18 -1.3(5) . . . . ? 
C21 C16 C17 C18 176.7(3) . . . . ? 
C16 C17 C18 C19 -0.5(5) . . . . ? 
C17 C18 C19 C20 0.9(5) . . . . ? 
C18 C19 C20 C15 0.5(5) . . . . ? 
C18 C19 C20 C24 173.4(3) . . . . ? 
N2 C15 C20 C19 177.9(3) . . . . ? 
C16 C15 C20 C19 -2.3(4) . . . . ? 
N2 C15 C20 C24 4.9(4) . . . . ? 
C16 C15 C20 C24 -175.3(2) . . . . ? 
C17 C16 C21 C22 -49.1(4) . . . . ? 
C15 C16 C21 C22 128.8(3) . . . . ? 
C17 C16 C21 C23 73.9(4) . . . . ? 
C15 C16 C21 C23 -108.1(3) . . . . ? 
C19 C20 C24 C26 -85.9(3) . . . . ? 
C15 C20 C24 C26 87.0(3) . . . . ? 
C19 C20 C24 C25 38.4(4) . . . . ? 
C15 C20 C24 C25 -148.6(3) . . . . ? 
C30 O1 C27 C28 17.8(3) . . . . ? 
Ca1 O1 C27 C28 -153.6(2) . . . . ? 
O1 C27 C28 C29 -34.1(3) . . . . ? 
C27 C28 C29 C30 37.3(3) . . . . ? 
C27 O1 C30 C29 6.0(4) . . . . ? 
Ca1 O1 C30 C29 176.2(2) . . . . ? 
C28 C29 C30 O1 -27.2(4) . . . . ? 
C34 O2 C31 C32 15.7(5) . . . . ? 
Ca1 O2 C31 C32 -164.2(3) . . . . ? 
O2 C31 C32 C33 -31.3(6) . . . . ? 
C31 C32 C33 C34 34.2(6) . . . . ? 
C31 O2 C34 C33 5.8(5) . . . . ? 
Ca1 O2 C34 C33 -174.3(3) . . . . ? 
C32 C33 C34 O2 -25.3(5) . . . . ? 
C38 O3 C35 C36 6.2(3) . . . . ? 
Ca1 O3 C35 C36 -173.51(18) . . . . ? 
O3 C35 C36 C37 -29.7(3) . . . . ? 
C35 C36 C37 C38 40.7(3) . . . . ? 
C35 O3 C38 C37 20.0(3) . . . . ? 
Ca1 O3 C38 C37 -160.34(19) . . . . ? 
C36 C37 C38 O3 -37.8(3) . . . . ? 
C42 O4 C39 C40 -22.6(4) . . . . ? 
Ca1 O4 C39 C40 148.7(3) . . . . ? 
O4 C39 C40 C41 36.7(5) . . . . ? 
C39 C40 C41 C42 -36.7(5) . . . . ? 
C39 O4 C42 C41 0.3(4) . . . . ? 
Ca1 O4 C42 C41 -168.6(3) . . . . ? 
C40 C41 C42 O4 24.0(5) . . . . ? 
C4S O5 C1S C2S 34.7(4) . . . . ? 
O5 C1S C2S C3S -23.7(5) . . . . ? 
C1S C2S C3S C4S 4.5(6) . . . . ? 
C1S O5 C4S C3S -31.2(5) . . . . ? 
C2S C3S C4S O5 16.1(6) . . . . ? 
C8S O6 C5S C6S -28.3(10) . . . . ? 
O6 C5S C6S C7S 7.2(12) . . . . ? 
C5S C6S C7S C8S 14.5(11) . . . . ? 
C5S O6 C8S C7S 38.8(9) . . . . ? 
C6S C7S C8S O6 -32.6(10) . . . . ? 
C7SA O6A C6SA C5SA 37.5(18) . . . . ? 
C8SA C5SA C6SA O6A -22.3(16) . . . . ? 
C6SA O6A C7SA C8SA -37.7(18) . . . . ? 
O6A C7SA C8SA C5SA 22.2(18) . . . . ? 
C6SA C5SA C8SA C7SA 0.2(16) . . . . ? 
 
_diffrn_measured_fraction_theta_max    0.998 
_diffrn_reflns_theta_full              25.04 
_diffrn_measured_fraction_theta_full   0.998 
_refine_diff_density_max    0.746 
_refine_diff_density_min   -0.364 
_refine_diff_density_rms    0.056 

#=== END
